# Supplementary material for: Analysis of the finasteride treatment and its withdrawal in the rat hypothalamus and hippocampus at whole-transcriptome level
Source: J Endocrinol Invest. 2024 Mar 17;47(10):2565–74. doi: 10.1007/s40618-024-02345-y (PMC11393021; doi:10.1007/s40618-024-02345-y)
Supplement: Supplementary file 4 — Supplementary file4 (XLSX 3952 KB) [file 40618_2024_2345_MOESM4_ESM.xlsx]

## Sheet: Results
Gene	baseMean	log2FoldChange	lfcSE	stat	pvalue	padj	padj_NoNA	Control_T1_5	Control_T1_6	Control_T1_7	Control_T1_8	Finasteride_T1_5	Finasteride_T1_6	Finasteride_T1_7	Finasteride_T1_8
0610030E20Rik	251.578	0.0944204	0.130437	0.723875	0.469142	0.999739	0.999739	231.642	243.969	225.326	270.834	250.694	223.383	278.222	288.552
0610040J01Rik	226.807	-0.075374	0.142017	-0.53074	0.595599	0.999739	0.999739	232.529	261.777	242.659	193.078	200.159	207.154	225.782	251.32
1110002E22Rik	9.3952	0.0829627	0.574787	0.144337	0.885235	0.999739	0.999739	4.43758	11.5752	6.93312	13.1049	7.92709	3.81852	14.5666	12.7987
1110032F04Rik	8.67574	0.412764	0.552564	0.746997	0.455065	0.999739	0.999739	7.10013	6.23278	11.2663	5.24194	4.95443	13.3648	7.2833	13.9622
1110038F14Rik	302.913	-0.147733	0.158789	-0.930373	0.352178	0.999739	0.999739	339.031	324.105	362.255	249.866	333.929	313.118	257.829	243.175
1110065P20Rik	1050.72	-0.0794609	0.137985	-0.575865	0.564706	0.999739	0.999739	1207.02	999.025	1262.69	850.942	1099.88	1003.32	914.782	1068.11
1500009L16Rik	228.623	0.116932	0.240755	0.485688	0.627188	0.999739	0.999739	153.54	184.312	312.857	228.024	263.576	300.708	166.059	219.905
1600012H06Rik	277.895	-0.0693756	0.113632	-0.610526	0.541513	0.999739	0.999739	295.543	273.352	259.992	308.401	253.667	275.888	289.875	266.446
1600014C10Rik	629.337	0.167575	0.113912	1.47109	0.141266	0.999739	0.999739	589.311	552.937	545.116	683.2	581.65	699.743	684.63	698.111
1700001P01Rik	0.948611	0.864306	1.89185	0.456857	0.647774	0.999739	0.999739	1.77503	0	0.86664	0	0	0	1.45666	3.49055
1700017N19Rik	1.7408	-0.0571758	1.25852	-0.0454311	0.963764	0.999739	0.999739	1.77503	3.56159	1.73328	0	0	1.90926	1.45666	3.49055
1700019D03Rik	127.618	0.373611	0.15598	2.39526	0.0166087	0.999739	0.999739	102.064	121.094	110.063	110.954	118.906	149.877	148.579	159.402
1700024G13Rik	20.7597	-0.815828	0.587181	-1.3894	0.164711	0.999739	0.999739	29.288	43.6295	30.3324	2.62097	14.8633	16.2287	17.4799	11.6352
1700028K03Rik	1.40195	0.612144	1.74187	0.35143	0.725266	0.999739	0.999739	2.66255	1.78079	0	0	0	0.954629	0	5.81759
1700030J22Rik	45.1976	-0.249514	0.227259	-1.09793	0.272236	0.999739	0.999739	44.3758	47.191	50.2651	54.1667	44.5899	36.2759	45.1564	39.5596
1700056E22Rik	1.19309	0.72318	1.44042	0.502062	0.615624	0.999739	0.999739	1.77503	0	0	1.74731	0.990886	0.954629	2.91332	1.16352
1700067K01Rik	0.571476	-0.309351	2.82705	-0.109425	0.912865	0.999739	0.999739	2.66255	0	0	0	0	1.90926	0	0
1700092M07Rik	4.43041	0.618252	0.83933	0.736602	0.461364	0.999739	0.999739	0.887516	7.12318	1.73328	4.36829	10.8997	2.86389	2.91332	4.65407
1700102P08Rik	22.2296	0.0895476	0.344241	0.260131	0.794763	0.999739	0.999739	25.738	24.0407	18.1994	18.3468	32.6992	17.1833	21.8499	19.7798
1700109H08Rik	7.67407	-0.220388	0.614175	-0.358836	0.719717	0.999739	0.999739	5.3251	8.90397	7.79976	10.4839	1.98177	4.77315	11.6533	10.4717
1700122O11Rik	1.71118	0.708824	1.47256	0.481355	0.630264	0.999739	0.999739	0.887516	0.890397	3.46656	0	4.95443	0	0	3.49055
1810010H24Rik	318.651	0.0122493	0.109493	0.111872	0.910925	0.999739	0.999739	345.244	324.105	308.524	291.801	326.002	306.436	301.529	345.565
1810037I17Rik	1407.25	-0.0662252	0.126347	-0.524155	0.600171	0.999739	0.999739	1506.12	1592.03	1504.49	1157.6	1566.59	1396.62	1222.14	1312.45
2010003K11Rik	12.4037	0.0536326	0.45998	0.116598	0.907179	0.999739	0.999739	11.5377	7.12318	17.3328	13.1049	15.8542	16.2287	8.73996	9.30814
2310039H08Rik	73.0888	0.473997	0.244569	1.93809	0.0526122	0.999739	0.999739	66.5637	61.4374	77.9976	39.3146	93.1433	82.0981	64.093	100.063
2610008E11Rik	378.886	0.0779352	0.173248	0.449847	0.652821	0.999739	0.999739	346.131	467.458	405.587	255.982	405.272	405.717	371.448	373.489
2700049A03Rik	263.719	-0.0930556	0.173513	-0.536302	0.59175	0.999739	0.999739	245.842	253.763	248.726	339.853	217.004	229.111	246.175	329.275
2810021J22Rik	179.747	0.106506	0.125722	0.847156	0.396908	0.999739	0.999739	172.178	166.504	162.062	191.331	185.296	180.425	189.366	190.817
2810459M11Rik	67.7456	0.110117	0.199723	0.55135	0.581394	0.999739	0.999739	55.9135	68.5606	62.3981	74.2608	63.4167	78.2796	61.1797	77.9557
3110082J24Rik	1.9247	-1.01716	1.21702	-0.835779	0.403279	0.999739	0.999739	2.66255	1.78079	0.86664	5.24194	1.98177	2.86389	0	0
4833439L19Rik	3340.6	0.0106032	0.0699351	0.151615	0.87949	0.999739	0.999739	3367.24	3374.6	3478.69	3092.75	3473.06	3331.66	3412.95	3193.86
4930444P10Rik	16.1275	0.0384019	0.390317	0.0983865	0.921625	0.999739	0.999739	14.2003	17.8079	10.3997	20.9678	16.8451	12.4102	18.9366	17.4528
4930455H04Rik	0.354129	1.02423	2.65748	0.385413	0.699932	0.999739	0.999739	0.887516	0	0	0	0.990886	0.954629	0	0
4930503L19Rik	280.288	0.188164	0.129647	1.45136	0.146681	0.999739	0.999739	256.492	284.037	233.126	273.455	263.576	281.616	304.442	345.565
4930523C07Rik	45.2168	-0.125288	0.267956	-0.467569	0.640093	0.999739	0.999739	49.7009	40.9583	35.5322	62.0296	31.7084	44.8676	48.0698	48.8677
4930544D05Rik	1.03338	-1.4577	1.51236	-0.963854	0.335119	0.999739	0.999739	0.887516	1.78079	1.73328	1.74731	0	0.954629	0	1.16352
4930563E22Rik	615.382	-0.146551	0.09784	-1.49787	0.134168	0.999739	0.999739	615.936	665.127	713.244	592.339	617.322	578.505	591.404	549.18
4931406B18Rik	2.27401	0.909444	1.02467	0.887547	0.374784	0.999739	0.999739	2.66255	1.78079	0.86664	0.873657	0.990886	2.86389	5.82664	2.32704
4933403O08Rik	0.599325	1.81067	2.33931	0.774018	0.43892	0.999739	0.999739	0	0.890397	0	0	0.990886	0	2.91332	0
6030468B19Rik	1.11246	-2.5348	1.72415	-1.47017	0.141515	0.999739	0.999739	0	3.56159	2.59992	1.74731	0.990886	0	0	0
6330403K07Rik	1515.22	-0.0832704	0.110228	-0.755438	0.449986	0.999739	0.999739	1745.74	1412.17	1642.28	1436.29	1622.08	1491.13	1488.71	1283.36
6330411D24Rik	8.48057	0.124723	0.520126	0.239794	0.81049	0.999739	0.999739	7.98765	7.12318	6.93312	10.4839	6.9362	8.59166	5.82664	13.9622
A130010J15Rik	136.372	-0.0861314	0.160367	-0.537088	0.591207	0.999739	0.999739	137.565	150.477	160.328	114.449	143.678	139.376	119.446	125.66
A1bg	2.91005	0.963964	0.8593	1.1218	0.261947	0.999739	0.999739	2.66255	1.78079	0.86664	2.62097	3.96354	3.81852	2.91332	4.65407
A2m	351.194	-0.0631279	0.160728	-0.392763	0.694495	0.999739	0.999739	425.12	326.776	323.257	358.199	301.229	275.888	397.668	401.414
A2ml1	3.82644	0.735902	0.748294	0.983441	0.325391	0.999739	0.999739	3.55007	2.67119	2.59992	2.62097	4.95443	2.86389	4.36998	6.98111
A3galt2	55.8187	-0.197783	0.218993	-0.903148	0.366447	0.999739	0.999739	61.2386	55.2046	64.998	55.9141	43.599	43.9129	61.1797	60.5029
A4galt	0.457072	0.286507	2.98011	0.0961397	0.92341	0.999739	0.999739	0	0	0	1.74731	0	1.90926	0	0
AA986860	0.881125	-2.16156	1.91462	-1.12897	0.25891	0.999739	0.999739	0.887516	0	4.3332	0.873657	0	0.954629	0	0
Aaas	430.323	-0.221964	0.106186	-2.09033	0.036588	0.999739	0.999739	445.533	469.239	443.719	493.616	393.382	353.213	400.581	443.3
AABR07000222.1	13.2681	-0.260264	0.437272	-0.595198	0.551711	0.999739	0.999739	12.4252	17.8079	14.7329	12.2312	9.90886	10.5009	20.3932	8.14462
AABR07000276.1	3.33544	-0.176479	0.914689	-0.192939	0.847007	0.999739	0.999739	4.43758	0.890397	4.3332	4.36829	3.96354	2.86389	5.82664	0
AABR07000398.1	45.0742	0.296319	0.498544	0.594369	0.552265	0.999739	0.999739	15.0878	17.8079	82.3308	46.3038	58.4623	23.8657	59.723	57.0124
AABR07000583.1	0.881636	1.59654	1.95778	0.815485	0.414795	0.999739	0.999739	0.887516	0.890397	0	0	0	3.81852	1.45666	0
AABR07000631.1	0.21927	-1.08482	3.53315	-0.307039	0.758813	0.999739	0.999739	0.887516	0	0.86664	0	0	0	0	0
AABR07000989.1	4.77528	-0.184937	0.727797	-0.254106	0.799414	0.999739	0.999739	2.66255	9.79437	4.3332	3.49463	5.94532	3.81852	5.82664	2.32704
AABR07001064.1	18.1275	0.269226	0.349105	0.771188	0.440596	0.999739	0.999739	17.7503	16.0271	12.9996	19.2205	21.7995	19.0926	16.0233	22.1068
AABR07001435.1	1.01138	0.34201	1.87138	0.182759	0.854987	0.999739	0.999739	0	3.56159	0	0	0	1.90926	1.45666	1.16352
AABR07001512.1	28.3538	-0.692007	1.02556	-0.674758	0.499829	0.999739	0.999739	44.3758	42.7391	49.3985	3.49463	43.599	4.77315	34.9598	3.49055
AABR07001519.1	141.113	0.117289	0.159485	0.735423	0.462082	0.999739	0.999739	126.915	129.108	123.929	162.5	143.678	170.879	136.926	134.968
AABR07001592.2	2.72599	-2.47622	1.21657	-2.0354	0.0418104	0.999739	0.999739	4.43758	6.23278	0.86664	6.98926	0	0.954629	0	2.32704
AABR07001902.1	30.1179	4.87475	2.2342	2.18188	NA	NA	1	5.3251	0.890397	1.73328	0	230.876	0.954629	0	1.16352
AABR07001910.1	16.7564	-0.814134	0.441274	-1.84497	0.0650426	0.999739	0.999739	23.9629	32.9447	14.7329	13.9785	16.8451	8.59166	10.1966	12.7987
AABR07001926.1	2.46418	-0.685716	0.999943	-0.685755	0.492868	0.999739	0.999739	1.77503	0.890397	3.46656	6.1156	1.98177	2.86389	1.45666	1.16352
AABR07001926.3	169.193	0.121152	0.184181	0.657785	0.510676	0.999739	0.999739	143.778	200.339	181.128	122.312	176.378	168.015	206.846	154.748
AABR07001942.1	11.5768	0.131274	0.447852	0.293119	0.769431	0.999739	0.999739	11.5377	10.6848	8.6664	13.1049	6.9362	14.3194	14.5666	12.7987
AABR07002025.1	0.660978	-1.66914	2.73255	-0.610835	0.541309	0.999739	0.999739	0	0	4.3332	0	0	0.954629	0	0
AABR07002065.2	306.602	0.0410759	0.152026	0.27019	0.787014	0.999739	0.999739	288.443	297.393	259.992	361.694	251.685	301.663	339.402	352.546
AABR07002066.2	0.221879	-1.09825	3.53247	-0.310901	0.755876	0.999739	0.999739	1.77503	0	0	0	0	0	0	0
AABR07002093.1	9.67834	-0.046142	0.520234	-0.0886946	0.929325	0.999739	0.999739	9.76268	12.4656	12.133	5.24194	10.8997	8.59166	4.36998	13.9622
AABR07002093.2	0.354489	1.02423	2.65674	0.385522	0.69985	0.999739	0.999739	0	0.890397	0	0	0.990886	0.954629	0	0
AABR07002546.1	0.2348	0.355471	3.53381	0.100591	0.919875	0.999739	0.999739	0.887516	0	0	0	0.990886	0	0	0
AABR07002623.1	2.58117	0.184089	0.935768	0.196725	0.844043	0.999739	0.999739	3.55007	2.67119	0.86664	2.62097	4.95443	1.90926	2.91332	1.16352
AABR07002627.1	3.55052	-0.487026	0.900404	-0.540897	0.588578	0.999739	0.999739	7.98765	1.78079	3.46656	3.49463	6.9362	0.954629	1.45666	2.32704
AABR07002683.1	1.09601	1.90668	1.93426	0.985741	0.32426	0.999739	0.999739	0.887516	0.890397	0	0	0	0	5.82664	1.16352
AABR07002689.1	0.841848	-1.95102	1.86286	-1.04732	0.294951	0.999739	0.999739	0	2.67119	1.73328	0.873657	0	0	1.45666	0
AABR07002774.1	57.2879	-0.258943	0.208105	-1.24429	0.213393	0.999739	0.999739	61.2386	64.1086	66.7313	56.7877	42.6081	51.55	58.2664	57.0124
AABR07002774.4	140.534	0.234399	0.209228	1.1203	0.262585	0.999739	0.999739	92.3017	143.354	122.196	159.879	153.587	174.697	110.706	167.547
AABR07002784.1	88.7496	0.302765	0.239575	1.26376	0.206317	0.999739	0.999739	81.6515	106.848	77.9976	52.4194	110.979	113.601	75.7463	90.7544
AABR07002788.1	3.13617	-0.124677	0.822402	-0.151601	0.879502	0.999739	0.999739	2.66255	3.56159	4.3332	2.62097	1.98177	3.81852	1.45666	4.65407
AABR07002848.1	162.823	-0.0351818	0.145075	-0.242507	0.808387	0.999739	0.999739	179.278	147.806	162.928	170.363	188.268	151.786	142.753	159.402
AABR07002868.1	134.053	0.0400899	0.194169	0.20647	0.836424	0.999739	0.999739	116.265	125.546	105.73	180.847	122.87	132.693	138.383	150.094
AABR07002870.2	77.4559	0.0351816	0.207947	0.169185	0.865651	0.999739	0.999739	58.5761	86.3685	69.3312	91.734	77.2891	71.5972	72.833	91.9179
AABR07002938.1	1.94275	0.647277	1.07169	0.603975	0.54586	0.999739	0.999739	2.66255	0.890397	0.86664	1.74731	1.98177	4.77315	1.45666	1.16352
AABR07002945.2	4.05318	-0.0432628	0.786967	-0.0549742	0.956159	0.999739	0.999739	3.55007	1.78079	6.06648	5.24194	6.9362	4.77315	2.91332	1.16352
AABR07002969.1	1041.25	0.0568551	0.0934778	0.608221	0.543041	0.999739	0.999739	1057.03	1007.93	1116.23	901.614	1120.69	1014.77	1069.19	1042.51
AABR07003049.1	4.27656	-0.791848	0.862705	-0.917867	0.358689	0.999739	0.999739	6.21261	4.45199	2.59992	8.73657	6.9362	3.81852	1.45666	0
AABR07003173.1	23.2743	-0.047682	0.423121	-0.112691	0.910275	0.999739	0.999739	31.0631	18.6983	32.0657	13.1049	38.6446	16.2287	18.9366	17.4528
AABR07003176.1	290.863	0.180012	0.17681	1.01811	0.308626	0.999739	0.999739	254.717	347.255	298.124	191.331	338.883	307.391	297.159	292.043
AABR07003187.1	1.9891	0.334966	1.06076	0.315778	0.752171	0.999739	0.999739	2.66255	0.890397	2.59992	0.873657	0.990886	3.81852	2.91332	1.16352
AABR07003537.1	179.829	0.355995	0.145869	2.44051	0.0146663	0.999739	0.999739	146.44	165.614	145.595	172.11	183.314	177.561	214.129	233.867
AABR07004112.1	5.90393	0.619049	0.714304	0.866647	0.386136	0.999739	0.999739	1.77503	8.01357	6.93312	1.74731	6.9362	6.6824	11.6533	3.49055
AABR07004269.3	10.1306	-0.0521705	0.543096	-0.0960612	0.923472	0.999739	0.999739	14.2003	8.90397	10.3997	7.86291	6.9362	8.59166	4.36998	19.7798
AABR07004733.2	0.356929	1.03516	3.15172	0.328443	0.742577	0.999739	0.999739	0	0	0	0.873657	1.98177	0	0	0
AABR07004876.1	0.293022	0.355473	3.30004	0.107718	0.914219	0.999739	0.999739	0.887516	0	0	0	0	0	1.45666	0
AABR07004881.1	394.439	0.198075	0.110079	1.79939	0.0719568	0.999739	0.999739	367.432	416.706	365.722	319.758	425.09	423.855	429.715	407.231
AABR07004992.1	4.66221	0.136778	0.784872	0.174268	0.861655	0.999739	0.999739	7.10013	4.45199	2.59992	3.49463	0.990886	3.81852	4.36998	10.4717
AABR07005004.1	9.14145	-0.0217214	0.493698	-0.0439972	0.964907	0.999739	0.999739	12.4252	8.90397	8.6664	6.98926	6.9362	11.4555	7.2833	10.4717
AABR07005004.3	8.59105	-0.0552761	0.522778	-0.105735	0.915792	0.999739	0.999739	11.5377	11.5752	5.19984	6.98926	9.90886	9.54629	5.82664	8.14462
AABR07005031.1	1.4288	-0.19866	1.34101	-0.148142	0.882231	0.999739	0.999739	1.77503	3.56159	0.86664	0	0.990886	1.90926	0	2.32704
AABR07005533.1	3.52819	-0.168917	0.851904	-0.198281	0.842825	0.999739	0.999739	6.21261	2.67119	2.59992	3.49463	0.990886	3.81852	1.45666	6.98111
AABR07005572.2	0.682606	-0.683999	1.8277	-0.374241	0.708225	0.999739	0.999739	1.77503	0	0.86664	0.873657	0.990886	0.954629	0	0
AABR07005775.1	36.8451	-0.738257	0.270644	-2.72778	0.0063763	0.999739	0.999739	53.251	33.8351	51.9984	45.4302	25.763	31.5028	26.2199	26.7609
AABR07005779.1	557.312	-0.0859495	0.0915281	-0.93905	0.347705	0.999739	0.999739	601.736	575.196	595.381	523.321	538.051	525.046	527.311	572.451
AABR07005779.3	63.4993	-0.00796232	1.12081	-0.00710407	0.994332	0.999739	0.999739	52.3635	6.23278	97.9303	97.8496	7.92709	9.54629	155.863	80.2827
AABR07005821.1	0.341398	-0.361819	2.69418	-0.134296	0.893168	0.999739	0.999739	0	0	0.86664	0.873657	0.990886	0	0	0
AABR07005838.1	1.37918	1.01984	1.33337	0.764864	0.444353	0.999739	0.999739	0.887516	0.890397	0.86664	0.873657	1.98177	0	4.36998	1.16352
AABR07005985.1	70.0667	-0.191883	0.199222	-0.963163	0.335466	0.999739	0.999739	74.5514	71.2318	77.9976	74.2608	58.4623	54.4139	67.0063	82.6098
AABR07006025.2	2.44764	0.814993	1.00953	0.807298	0.419495	0.999739	0.999739	2.66255	0.890397	0	3.49463	2.97266	2.86389	4.36998	2.32704
AABR07006030.1	10.5674	-0.212541	0.518134	-0.410204	0.681656	0.999739	0.999739	10.6502	8.90397	11.2663	14.8522	9.90886	8.59166	2.91332	17.4528
AABR07006081.1	0.336866	-0.36181	2.70402	-0.133805	0.893557	0.999739	0.999739	0	0	0.86664	0.873657	0	0.954629	0	0
AABR07006111.1	0.463336	0.307055	2.23628	0.137306	0.890789	0.999739	0.999739	0.887516	0	0	0.873657	0.990886	0.954629	0	0
AABR07006142.1	0.233068	0.355471	3.53381	0.100591	0.919875	0.999739	0.999739	0	0	0	0.873657	0.990886	0	0	0
AABR07006160.1	6.13792	-0.719839	0.629827	-1.14292	0.253074	0.999739	0.999739	4.43758	7.12318	10.3997	8.73657	6.9362	4.77315	4.36998	2.32704
AABR07006255.1	0.90661	-1.26334	2.12778	-0.593737	0.552688	0.999739	0.999739	0	2.67119	2.59992	0	1.98177	0	0	0
AABR07006275.1	0.571476	-0.309351	2.82705	-0.109425	0.912865	0.999739	0.999739	2.66255	0	0	0	0	1.90926	0	0
AABR07006278.1	0.417243	1.0888	2.55252	0.426557	0.669702	0.999739	0.999739	0	0.890397	0	0	0.990886	0	1.45666	0
AABR07006283.1	9.3671	-0.308821	0.511527	-0.603725	0.546027	0.999739	0.999739	10.6502	12.4656	9.53304	8.73657	3.96354	12.4102	10.1966	6.98111
AABR07006333.1	0.676341	-0.69576	2.00822	-0.346456	0.729	0.999739	0.999739	0.887516	0	0.86664	1.74731	0	1.90926	0	0
AABR07006451.1	0.217537	-1.08269	3.53326	-0.306427	0.759279	0.999739	0.999739	0	0	0.86664	0.873657	0	0	0	0
AABR07006474.1	0.233068	0.355471	3.53381	0.100591	0.919875	0.999739	0.999739	0	0	0	0.873657	0.990886	0	0	0
AABR07006576.1	0.336866	-0.36181	2.70402	-0.133805	0.893557	0.999739	0.999739	0	0	0.86664	0.873657	0	0.954629	0	0
AABR07006627.1	1.30273	-1.06979	1.32074	-0.809998	0.417941	0.999739	0.999739	1.77503	0.890397	1.73328	2.62097	0.990886	0.954629	1.45666	0
AABR07006673.2	0.684011	-0.672189	2.29839	-0.292461	0.769934	0.999739	0.999739	0	0.890397	2.59992	0	1.98177	0	0	0
AABR07006685.1	9.09161	0.818297	0.5246	1.55985	0.118796	0.999739	0.999739	6.21261	5.34238	10.3997	4.36829	14.8633	11.4555	13.1099	6.98111
AABR07006688.2	3.04743	-0.019395	0.810078	-0.0239422	0.980899	0.999739	0.999739	2.66255	3.56159	3.46656	2.62097	3.96354	2.86389	2.91332	2.32704
AABR07006691.1	0.843946	1.56494	1.91577	0.816875	0.414	0.999739	0.999739	0	0	1.73328	0	0.990886	2.86389	0	1.16352
AABR07006724.1	95.5465	0.327526	0.264265	1.23939	0.215202	0.999739	0.999739	63.0137	81.0261	64.998	129.301	78.28	101.191	120.903	125.66
AABR07007032.1	2361.87	-0.00721585	0.127206	-0.0567258	0.954764	0.999739	0.999739	2234.77	2243.8	2124.13	2867.34	1986.73	2389.44	2423.88	2624.9
AABR07007068.1	275.025	0.200849	0.240179	0.836248	0.403015	0.999739	0.999739	211.229	265.338	204.527	341.6	170.432	329.347	361.252	316.477
AABR07007088.1	0.326744	-1.66059	3.18931	-0.520675	0.602593	0.999739	0.999739	0	0	0.86664	1.74731	0	0	0	0
AABR07007121.1	0.587465	-1.37175	2.34648	-0.584599	0.558818	0.999739	0.999739	2.66255	0	0	0.873657	0	0	0	1.16352
AABR07007146.1	0.969146	-0.406529	1.88743	-0.215387	0.829465	0.999739	0.999739	0	3.56159	0	0.873657	0.990886	0	0	2.32704
AABR07007642.1	1288.55	0.083381	0.25615	0.325516	0.74479	0.999739	0.999739	1132.47	1047.11	851.04	1973.59	857.117	1268.7	1640.2	1538.17
AABR07007675.1	140.727	-0.0239381	0.223795	-0.106965	0.914817	0.999739	0.999739	174.841	136.231	173.328	82.9974	135.751	136.512	144.209	141.949
AABR07007730.1	0.486647	0.341743	2.49946	0.136727	0.891247	0.999739	0.999739	1.77503	0	0	0	0	0.954629	0	1.16352
AABR07008066.2	111.85	0.122166	0.204794	0.596532	0.55082	0.999739	0.999739	93.1892	106.848	106.597	122.312	150.615	115.51	119.446	80.2827
AABR07008309.1	0.973208	-0.363304	1.83427	-0.198065	0.842994	0.999739	0.999739	0	0	2.59992	1.74731	1.98177	0	1.45666	0
AABR07008319.1	0.21927	-1.08482	3.53315	-0.307039	0.758813	0.999739	0.999739	0.887516	0	0.86664	0	0	0	0	0
AABR07008421.1	0.293382	0.355473	3.29871	0.107762	0.914185	0.999739	0.999739	0	0.890397	0	0	0	0	1.45666	0
AABR07008608.1	7.4723	-0.42477	0.593296	-0.71595	0.474022	0.999739	0.999739	5.3251	9.79437	6.06648	13.1049	3.96354	6.6824	4.36998	10.4717
AABR07008681.1	1.10241	-0.609421	1.53412	-0.397246	0.691186	0.999739	0.999739	0.887516	0.890397	3.46656	0	0	0.954629	1.45666	1.16352
AABR07008904.1	5.27666	-0.134071	0.651503	-0.205787	0.836958	0.999739	0.999739	7.98765	6.23278	5.19984	2.62097	3.96354	5.72777	5.82664	4.65407
AABR07008911.1	5.00727	-0.0670867	0.689159	-0.0973457	0.922452	0.999739	0.999739	6.21261	6.23278	5.19984	2.62097	5.94532	1.90926	7.2833	4.65407
AABR07008940.1	0.564514	-1.36797	2.05534	-0.665572	0.505685	0.999739	0.999739	0.887516	0.890397	0	1.74731	0.990886	0	0	0
AABR07009105.1	12.4854	0.257796	0.464114	0.555459	0.578581	0.999739	0.999739	12.4252	14.2464	13.8662	5.24194	11.8906	17.1833	8.73996	16.2892
AABR07009572.1	31.6262	-0.453274	0.328596	-1.37943	0.167763	0.999739	0.999739	31.0631	44.5199	25.9992	44.5565	36.6628	21.0018	30.5899	18.6163
AABR07009715.1	5.45755	0.679416	0.633843	1.0719	0.283765	0.999739	0.999739	3.55007	5.34238	4.3332	3.49463	4.95443	8.59166	8.73996	4.65407
AABR07009978.1	2.13343	-0.33958	1.10297	-0.307878	0.758176	0.999739	0.999739	0	1.78079	5.19984	2.62097	1.98177	2.86389	1.45666	1.16352
AABR07010085.2	0.34349	-0.363813	2.68957	-0.135268	0.8924	0.999739	0.999739	0	0.890397	0.86664	0	0.990886	0	0	0
AABR07010333.1	0.709077	-0.640433	1.69584	-0.37765	0.70569	0.999739	0.999739	0.887516	0.890397	0.86664	0.873657	0.990886	0	0	1.16352
AABR07010705.1	2.00695	-0.937962	1.14451	-0.819534	0.412482	0.999739	0.999739	1.77503	3.56159	0.86664	4.36829	0	2.86389	1.45666	1.16352
AABR07010787.1	8.68002	0.550435	0.493093	1.11629	0.264299	0.999739	0.999739	7.10013	5.34238	7.79976	7.86291	8.91798	11.4555	11.6533	9.30814
AABR07011057.1	2.42742	0.513309	0.957391	0.536153	0.591852	0.999739	0.999739	0.887516	2.67119	1.73328	2.62097	0.990886	3.81852	4.36998	2.32704
AABR07011672.1	0.877559	1.61634	1.72539	0.936798	0.348863	0.999739	0.999739	0	0.890397	0.86664	0	1.98177	0.954629	0	2.32704
AABR07011697.1	19.9831	0.444276	0.331496	1.34022	0.180175	0.999739	0.999739	15.9753	17.8079	13.8662	20.0941	20.8086	23.8657	21.8499	25.5974
AABR07011698.1	19.3022	-0.36091	0.449336	-0.803209	0.421854	0.999739	0.999739	28.4005	10.6848	28.5991	19.2205	14.8633	13.3648	10.1966	29.0879
AABR07011951.1	2.07818	-0.15957	1.08296	-0.147346	0.882859	0.999739	0.999739	0.887516	1.78079	5.19984	0.873657	1.98177	0.954629	1.45666	3.49055
AABR07012054.1	0.976465	1.01462	1.81537	0.558907	0.576225	0.999739	0.999739	0.887516	0	1.73328	0	0	2.86389	0	2.32704
AABR07012594.1	0.359021	1.03519	3.14593	0.329055	0.742114	0.999739	0.999739	0	0.890397	0	0	1.98177	0	0	0
AABR07012795.1	9.79003	-0.327315	0.500476	-0.654007	0.513107	0.999739	0.999739	10.6502	9.79437	12.133	11.3575	8.91798	8.59166	2.91332	13.9622
AABR07012991.1	0.293022	0.355473	3.30004	0.107718	0.914219	0.999739	0.999739	0.887516	0	0	0	0	0	1.45666	0
AABR07013065.1	0.222599	-1.09825	3.53247	-0.310901	0.755876	0.999739	0.999739	0	1.78079	0	0	0	0	0	0
AABR07013086.1	3.31686	-0.535499	0.862212	-0.621076	0.534549	0.999739	0.999739	4.43758	2.67119	5.19984	3.49463	4.95443	2.86389	2.91332	0
AABR07013165.1	4.17443	-0.432281	0.734686	-0.588388	0.556272	0.999739	0.999739	3.55007	3.56159	6.06648	6.1156	3.96354	2.86389	1.45666	5.81759
AABR07013200.1	1.67853	-1.75052	1.403	-1.2477	0.212142	0.999739	0.999739	2.66255	3.56159	3.46656	0.873657	0	2.86389	0	0
AABR07013208.1	15.1376	-0.0312356	0.414596	-0.0753398	0.939944	0.999739	0.999739	10.6502	16.0271	15.5995	19.2205	16.8451	20.0472	14.5666	8.14462
AABR07013776.1	0.560342	-1.36911	2.33625	-0.586031	0.557855	0.999739	0.999739	0	1.78079	0	1.74731	0	0.954629	0	0
AABR07013860.4	0.998711	-2.36034	1.62303	-1.45428	0.145869	0.999739	0.999739	0.887516	0.890397	2.59992	2.62097	0.990886	0	0	0
AABR07014177.1	0.256739	0.355472	3.4477	0.103104	0.91788	0.999739	0.999739	0	0.890397	0	0	0	0	0	1.16352
AABR07014301.2	0.404682	-0.375648	3.03943	-0.123592	0.901639	0.999739	0.999739	0	1.78079	0	0	0	0	1.45666	0
AABR07014550.1	203.01	-0.0354055	0.85978	-0.0411797	0.967153	0.999739	0.999739	302.643	270.681	11.2663	237.635	316.093	245.34	101.966	138.459
AABR07014676.1	0.918136	0.211135	1.86947	0.112938	0.91008	0.999739	0.999739	0	0.890397	2.59992	0	0.990886	2.86389	0	0
AABR07014804.1	3.19028	-0.820336	0.933444	-0.878826	0.379495	0.999739	0.999739	2.66255	2.67119	5.19984	6.1156	1.98177	5.72777	0	1.16352
AABR07015180.1	0.256379	0.355472	3.44932	0.103056	0.917919	0.999739	0.999739	0.887516	0	0	0	0	0	0	1.16352
AABR07015346.1	738.643	-0.218503	0.131728	-1.65874	0.0971673	0.999739	0.999739	836.928	836.973	877.039	628.159	706.502	758.93	664.237	600.375
AABR07015507.1	571.635	0.0160775	0.137503	0.116925	0.90692	0.999739	0.999739	607.949	552.046	661.246	454.302	602.459	635.783	505.461	553.834
AABR07015812.1	202.291	0.241924	0.285472	0.847451	0.396744	0.999739	0.999739	145.553	161.162	116.13	318.011	162.505	218.61	263.655	232.704
AABR07015889.1	1.84222	0.133113	1.06859	0.124569	0.900865	0.999739	0.999739	0.887516	3.56159	0.86664	1.74731	1.98177	1.90926	1.45666	2.32704
AABR07015941.1	14.2027	-0.405554	0.476171	-0.851698	0.394382	0.999739	0.999739	19.5254	14.2464	19.9327	11.3575	22.7904	8.59166	10.1966	6.98111
AABR07016612.1	0.461604	0.305223	2.53376	0.120463	0.904117	0.999739	0.999739	0	0	0	1.74731	0.990886	0.954629	0	0
AABR07016623.1	0.701993	1.2004	2.01759	0.594966	0.551866	0.999739	0.999739	0.887516	0	0	0.873657	0.990886	2.86389	0	0
AABR07016779.1	0.968157	0.993609	1.65631	0.599893	0.548578	0.999739	0.999739	0	1.78079	0	0.873657	2.97266	0.954629	0	1.16352
AABR07017110.1	27.7441	0.200958	0.282312	0.711828	0.476571	0.999739	0.999739	26.6255	29.3831	24.2659	22.7151	29.7266	25.775	32.0465	31.415
AABR07017203.1	0.330209	-1.67363	3.18051	-0.526216	0.598738	0.999739	0.999739	1.77503	0	0.86664	0	0	0	0	0
AABR07017227.1	6.64053	-0.426399	0.579982	-0.735193	0.462222	0.999739	0.999739	9.76268	5.34238	6.93312	8.73657	6.9362	6.6824	2.91332	5.81759
AABR07017236.1	0.21927	-1.08482	3.53315	-0.307039	0.758813	0.999739	0.999739	0.887516	0	0.86664	0	0	0	0	0
AABR07017236.2	3.07296	0.209026	0.862598	0.242321	0.808531	0.999739	0.999739	3.55007	3.56159	0.86664	3.49463	2.97266	2.86389	1.45666	5.81759
AABR07017241.1	1.75071	-1.14526	1.23377	-0.928266	0.35327	0.999739	0.999739	3.55007	1.78079	1.73328	2.62097	0	2.86389	1.45666	0
AABR07017250.1	15.4123	-0.0392588	0.505101	-0.0777246	0.938047	0.999739	0.999739	14.2003	9.79437	20.7994	17.4731	24.7722	8.59166	21.8499	5.81759
AABR07017733.1	12.882	0.438472	0.414695	1.05733	0.290359	0.999739	0.999739	9.76268	9.79437	12.133	12.2312	11.8906	18.138	11.6533	17.4528
AABR07017838.1	0.547152	0.436493	2.17754	0.200452	0.841127	0.999739	0.999739	0	0.890397	0.86664	0	0	0	1.45666	1.16352
AABR07017902.1	10.4296	-0.320789	0.552571	-0.580539	0.561551	0.999739	0.999739	8.87516	12.4656	20.7994	4.36829	7.92709	12.4102	7.2833	9.30814
AABR07017902.2	0.221879	-1.09825	3.53247	-0.310901	0.755876	0.999739	0.999739	1.77503	0	0	0	0	0	0	0
AABR07017917.1	0.713779	-0.647312	1.98592	-0.325951	0.744461	0.999739	0.999739	1.77503	1.78079	0	0	0.990886	0	0	1.16352
AABR07017999.1	2.28509	0.357127	1.00931	0.353832	0.723465	0.999739	0.999739	3.55007	1.78079	1.73328	0.873657	0.990886	3.81852	4.36998	1.16352
AABR07018050.1	0.818235	0.481202	1.94687	0.247167	0.804779	0.999739	0.999739	1.77503	0	0.86664	0	0.990886	0	2.91332	0
AABR07018058.1	0.21963	-1.08482	3.53315	-0.307039	0.758813	0.999739	0.999739	0	0.890397	0.86664	0	0	0	0	0
AABR07018167.1	1.42251	-0.19025	1.32615	-0.143461	0.885926	0.999739	0.999739	2.66255	0.890397	2.59992	0	0.990886	1.90926	0	2.32704
AABR07018244.1	0.937312	0.225019	1.88156	0.119591	0.904807	0.999739	0.999739	0.887516	1.78079	0.86664	0	3.96354	0	0	0
AABR07018244.2	0.55779	1.70863	2.09372	0.816072	0.414459	0.999739	0.999739	0.887516	0	0	0	0	0.954629	1.45666	1.16352
AABR07018273.2	0.559105	-1.36588	1.87273	-0.729355	0.465785	0.999739	0.999739	0.887516	0.890397	0.86664	0.873657	0	0.954629	0	0
AABR07018533.1	0.925469	0.802276	1.69451	0.473455	0.635889	0.999739	0.999739	1.77503	0.890397	0	0	0	0.954629	1.45666	2.32704
AABR07019088.1	8.69012	0.680729	0.564132	1.20669	0.227553	0.999739	0.999739	3.55007	9.79437	5.19984	7.86291	4.95443	10.5009	16.0233	11.6352
AABR07019341.1	3.74913	-0.704391	0.826609	-0.852145	0.394134	0.999739	0.999739	6.21261	1.78079	7.79976	2.62097	2.97266	1.90926	4.36998	2.32704
AABR07019403.1	197.425	0.0499436	0.149043	0.335095	0.737554	0.999739	0.999739	218.329	214.586	175.928	167.742	232.858	184.243	193.736	191.98
AABR07019442.1	0.230268	0.355471	3.53381	0.100591	0.919875	0.999739	0.999739	0.887516	0	0	0	0	0.954629	0	0
AABR07020879.1	24.1959	-0.560829	0.397491	-1.41092	0.158267	0.999739	0.999739	31.9506	22.2599	33.7989	26.2097	7.92709	18.138	33.5032	19.7798
AABR07020987.1	2.07388	0.391948	1.12956	0.346991	0.728598	0.999739	0.999739	3.55007	1.78079	0	1.74731	0.990886	0.954629	2.91332	4.65407
AABR07020999.1	3.48397	0.137423	0.763482	0.179995	0.857156	0.999739	0.999739	4.43758	3.56159	2.59992	2.62097	2.97266	3.81852	4.36998	3.49055
AABR07021008.1	0.34574	-0.376087	3.19133	-0.117846	0.906189	0.999739	0.999739	1.77503	0	0	0	0.990886	0	0	0
AABR07021022.1	1.18919	1.37365	1.47708	0.929977	0.352383	0.999739	0.999739	0.887516	0	1.73328	0	0.990886	0.954629	1.45666	3.49055
AABR07021086.1	1.39605	-1.96871	1.53811	-1.27996	0.200559	0.999739	0.999739	2.66255	0	2.59992	3.49463	0	0.954629	1.45666	0
AABR07021384.1	5.48669	0.60627	0.804947	0.75318	0.451341	0.999739	0.999739	5.3251	3.56159	7.79976	0.873657	14.8633	4.77315	4.36998	2.32704
AABR07021463.1	0.256739	0.355472	3.4477	0.103104	0.91788	0.999739	0.999739	0	0.890397	0	0	0	0	0	1.16352
AABR07021465.1	4.20209	0.447177	0.70887	0.630831	0.528151	0.999739	0.999739	4.43758	2.67119	3.46656	3.49463	4.95443	3.81852	7.2833	3.49055
AABR07021465.2	2.91066	-0.15458	0.888088	-0.17406	0.861818	0.999739	0.999739	2.66255	2.67119	5.19984	1.74731	0.990886	4.77315	2.91332	2.32704
AABR07021503.1	3.54598	-0.476735	0.806821	-0.590881	0.5546	0.999739	0.999739	3.55007	3.56159	6.93312	2.62097	1.98177	4.77315	1.45666	3.49055
AABR07021536.1	24.4772	0.506886	0.482944	1.04958	0.293914	0.999739	0.999739	14.2003	21.3695	9.53304	35.8199	11.8906	43.9129	27.6765	31.415
AABR07021573.2	2.16579	1.20335	0.997732	1.20608	0.227786	0.999739	0.999739	0.887516	0.890397	1.73328	1.74731	3.96354	2.86389	2.91332	2.32704
AABR07021636.1	1.63194	0.139055	1.12915	0.12315	0.901988	0.999739	0.999739	1.77503	1.78079	1.73328	0.873657	0.990886	0.954629	1.45666	3.49055
AABR07021734.1	80.9239	0.0211511	0.172559	0.122573	0.902445	0.999739	0.999739	75.4389	89.9301	79.7308	76.0082	83.2344	78.2796	84.4863	80.2827
AABR07021759.1	5.50801	-0.61975	0.736828	-0.841105	0.400289	0.999739	0.999739	5.3251	10.6848	4.3332	6.1156	2.97266	0.954629	4.36998	9.30814
AABR07021812.1	1731.52	0.0495178	0.10105	0.490034	0.62411	0.999739	0.999739	1564.69	1846.68	1526.15	1868.75	1606.23	1794.7	1813.54	1831.38
AABR07021863.1	9.78429	0.280789	0.522436	0.537461	0.590949	0.999739	0.999739	7.10013	8.01357	7.79976	12.2312	15.8542	5.72777	14.5666	6.98111
AABR07021871.1	11.6292	0.285235	0.435565	0.654863	0.512556	0.999739	0.999739	10.6502	13.356	9.53304	8.73657	15.8542	13.3648	8.73996	12.7987
AABR07021955.1	324.35	-0.0228173	0.114493	-0.199289	0.842037	0.999739	0.999739	308.856	361.501	316.323	323.253	329.965	353.213	284.049	317.64
AABR07022022.1	1.44029	1.16448	1.22801	0.948265	0.342995	0.999739	0.999739	0.887516	0.890397	0.86664	0.873657	2.97266	0.954629	2.91332	1.16352
AABR07022046.1	0.499569	1.58288	2.12633	0.744417	0.456624	0.999739	0.999739	0.887516	0	0	0	0.990886	0.954629	0	1.16352
AABR07022098.1	26.0779	0.178203	0.356664	0.499638	0.61733	0.999739	0.999739	28.4005	27.6023	30.3324	11.3575	24.7722	30.5481	33.5032	22.1068
AABR07022144.1	223.909	-0.045603	0.231967	-0.196593	0.844146	0.999739	0.999739	305.306	147.806	269.525	187.836	266.548	235.793	203.932	174.528
AABR07022157.1	0.49118	0.359282	2.49643	0.143918	0.885565	0.999739	0.999739	1.77503	0	0	0	0.990886	0	0	1.16352
AABR07022168.1	2.37068	0.78759	1.06969	0.736276	0.461563	0.999739	0.999739	1.77503	0	4.3332	0.873657	3.96354	1.90926	1.45666	4.65407
AABR07024439.1	3.93185	-0.148363	0.775973	-0.191196	0.848372	0.999739	0.999739	7.10013	4.45199	1.73328	3.49463	4.95443	4.77315	1.45666	3.49055
AABR07024500.1	3.56793	-1.11495	0.865177	-1.2887	0.197503	0.999739	0.999739	7.98765	6.23278	1.73328	3.49463	0.990886	2.86389	2.91332	2.32704
AABR07024637.1	43.5492	-0.0172929	0.252889	-0.0683813	0.945482	0.999739	0.999739	54.1385	45.4102	31.199	44.5565	37.6537	48.6861	43.6998	43.0502
AABR07024653.1	1.12432	-1.68359	1.6497	-1.02054	0.307473	0.999739	0.999739	0.887516	3.56159	2.59992	0	0.990886	0.954629	0	0
AABR07024742.1	2.20867	-1.56607	1.17164	-1.33664	0.181339	0.999739	0.999739	5.3251	2.67119	1.73328	3.49463	0	0.954629	0	3.49055
AABR07024795.1	5.65843	0.122831	0.655194	0.187473	0.85129	0.999739	0.999739	4.43758	2.67119	8.6664	6.1156	8.91798	5.72777	2.91332	5.81759
AABR07024869.1	0.957686	1.00263	1.62432	0.617264	0.537061	0.999739	0.999739	0	0	1.73328	0.873657	1.98177	1.90926	0	1.16352
AABR07024964.1	0.820376	-0.965116	1.62872	-0.592559	0.553476	0.999739	0.999739	0.887516	1.78079	0.86664	0.873657	0.990886	0	0	1.16352
AABR07025010.1	2.131	-1.43236	1.38236	-1.03617	0.300122	0.999739	0.999739	4.43758	5.34238	0.86664	1.74731	0	0	0	4.65407
AABR07025089.1	1.62844	-2.22877	1.55125	-1.43676	0.150787	0.999739	0.999739	0	6.23278	2.59992	1.74731	0.990886	0	1.45666	0
AABR07025140.1	4.31218	0.245634	0.763457	0.321739	0.74765	0.999739	0.999739	7.10013	0.890397	4.3332	3.49463	2.97266	6.6824	4.36998	4.65407
AABR07025272.1	2.14387	-0.341499	0.9815	-0.347936	0.727888	0.999739	0.999739	3.55007	1.78079	1.73328	2.62097	1.98177	2.86389	1.45666	1.16352
AABR07025301.1	2.16666	0.216674	1.04318	0.207705	0.83546	0.999739	0.999739	0.887516	0.890397	2.59992	3.49463	2.97266	0.954629	4.36998	1.16352
AABR07025743.1	0.293022	0.355473	3.30004	0.107718	0.914219	0.999739	0.999739	0.887516	0	0	0	0	0	1.45666	0
AABR07025819.1	0.770705	-2.89617	1.81613	-1.5947	0.11078	0.999739	0.999739	0.887516	2.67119	1.73328	0.873657	0	0	0	0
AABR07025896.1	0.217537	-1.08269	3.53326	-0.306427	0.759279	0.999739	0.999739	0	0	0.86664	0.873657	0	0	0	0
AABR07025928.1	0.658968	-0.169891	1.88376	-0.0901874	0.928138	0.999739	0.999739	0.887516	0.890397	0	0.873657	0	0	1.45666	1.16352
AABR07026002.1	64.874	0.134334	0.202499	0.663379	0.507088	0.999739	0.999739	62.1261	67.6702	51.9984	64.6506	60.4441	60.1416	78.6596	73.3016
AABR07026032.1	525.875	0.335927	0.142208	2.36222	0.0181657	0.999739	0.999739	447.308	510.197	496.585	407.998	697.584	635.783	476.328	535.218
AABR07026240.1	0.440136	-2.0882	2.43366	-0.858048	0.390866	0.999739	0.999739	0	1.78079	0.86664	0.873657	0	0	0	0
AABR07026291.1	204.611	0.413698	0.170203	2.43062	0.0150731	0.999739	0.999739	183.716	194.107	146.462	176.479	176.378	225.292	256.372	278.081
AABR07026311.1	4.40036	0.334713	0.963441	0.347414	0.72828	0.999739	0.999739	6.21261	0	6.93312	2.62097	6.9362	6.6824	0	5.81759
AABR07026317.1	7.68103	0.17637	0.614341	0.287088	0.774045	0.999739	0.999739	9.76268	5.34238	11.2663	2.62097	12.8815	7.63703	7.2833	4.65407
AABR07026557.1	0.2693	1.81376	3.3875	0.535426	0.592355	0.999739	0.999739	0	0	0	0	0.990886	0	0	1.16352
AABR07026565.1	40.4119	-0.107084	0.29902	-0.358118	0.720255	0.999739	0.999739	34.6131	36.5063	45.9319	50.6721	26.7539	56.3231	42.2431	30.2515
AABR07026797.1	11.8875	0.191446	0.450768	0.42471	0.671048	0.999739	0.999739	8.87516	11.5752	10.3997	13.9785	12.8815	15.2741	5.82664	16.2892
AABR07026805.1	170.639	0.290312	0.287803	1.00872	0.31311	0.999739	0.999739	104.727	175.408	134.329	200.067	133.77	299.754	187.909	129.15
AABR07026929.1	7.96767	-0.113477	0.567094	-0.200102	0.841401	0.999739	0.999739	6.21261	9.79437	6.93312	9.61023	4.95443	3.81852	13.1099	9.30814
AABR07026997.1	1.46402	1.20408	1.50683	0.799085	0.424241	0.999739	0.999739	0.887516	0	2.59992	0	0.990886	2.86389	4.36998	0
AABR07027015.1	2.198	-0.21723	1.08522	-0.200172	0.841346	0.999739	0.999739	3.55007	2.67119	1.73328	1.74731	0.990886	5.72777	0	1.16352
AABR07027258.1	3.14798	0.506426	0.975748	0.519014	0.603751	0.999739	0.999739	0.887516	3.56159	3.46656	2.62097	9.90886	0.954629	1.45666	2.32704
AABR07027309.1	30.3174	-0.275336	0.328507	-0.838143	0.40195	0.999739	0.999739	31.9506	39.1775	37.2655	23.5887	27.7448	15.2741	34.9598	32.5785
AABR07027810.4	0.305943	1.81337	3.25658	0.556834	0.577641	0.999739	0.999739	0	0	0	0	0.990886	0	1.45666	0
AABR07027854.1	9.49707	0.240001	0.486396	0.493426	0.621711	0.999739	0.999739	8.87516	7.12318	12.133	6.98926	10.8997	13.3648	7.2833	9.30814
AABR07027872.1	0.34349	-0.363813	2.68957	-0.135268	0.8924	0.999739	0.999739	0	0.890397	0.86664	0	0.990886	0	0	0
AABR07027925.1	4.992	0.99883	0.727768	1.37246	0.169921	0.999739	0.999739	2.66255	1.78079	6.06648	2.62097	7.92709	2.86389	10.1966	5.81759
AABR07028027.1	70.9068	-0.0752176	0.203983	-0.368743	0.712319	0.999739	0.999739	84.3141	69.451	77.1309	60.2823	61.4349	69.6879	61.1797	83.7733
AABR07028349.1	5.82534	-0.472044	0.637103	-0.740921	0.458741	0.999739	0.999739	4.43758	8.90397	5.19984	8.73657	5.94532	6.6824	4.36998	2.32704
AABR07028488.1	580.713	-0.0930777	0.147731	-0.63005	0.528662	0.999739	0.999739	649.662	551.156	529.517	666.6	423.108	620.509	588.49	616.664
AABR07028748.1	0.356929	1.03516	3.15172	0.328443	0.742577	0.999739	0.999739	0	0	0	0.873657	1.98177	0	0	0
AABR07028769.1	1777.41	0.0963094	0.102289	0.941539	0.346429	0.999739	0.999739	1790.12	1933.05	1656.15	1493.95	1725.13	1988.49	1785.86	1846.5
AABR07028805.1	0.458287	0.292705	2.53944	0.115264	0.908236	0.999739	0.999739	0	0.890397	0.86664	0	0	1.90926	0	0
AABR07028902.1	1440.03	0.115332	0.180759	0.63804	0.523447	0.999739	0.999739	1324.17	1577.78	1156.96	1468.62	1126.64	1207.61	1915.51	1742.95
AABR07029195.1	103.38	0.454218	0.278452	1.63123	0.102843	0.999739	0.999739	105.614	95.2725	78.8642	69.0189	93.1433	89.7351	97.5962	197.798
AABR07029262.1	0.220507	-1.08965	3.5329	-0.308428	0.757757	0.999739	0.999739	0	0.890397	0	0.873657	0	0	0	0
AABR07029269.1	23.4047	0.487184	0.393381	1.23845	0.215548	0.999739	0.999739	22.1879	16.9175	11.2663	27.0834	17.836	20.0472	33.5032	38.3961
AABR07029272.1	86.4062	-0.0594867	0.187641	-0.317025	0.751225	0.999739	0.999739	85.2016	92.6013	88.3972	85.6184	69.362	94.5083	103.423	72.1381
AABR07029581.1	3554.73	0.0431391	0.0911944	0.473045	0.636181	0.999739	0.999739	3363.69	3520.63	3243.83	3877.29	3226.33	3763.15	3676.61	3766.31
AABR07029596.1	147.494	-0.0106261	0.152004	-0.0699069	0.944268	0.999739	0.999739	140.228	138.012	170.728	141.532	145.66	127.92	170.429	145.44
AABR07029605.1	1053.98	0.131035	0.114847	1.14095	0.25389	0.999739	0.999739	851.128	1113	920.371	1139.25	1103.85	1051.05	1153.67	1099.52
AABR07029613.1	153.33	-0.0827502	0.215815	-0.383431	0.7014	0.999739	0.999739	159.753	168.285	172.461	131.922	207.095	129.83	99.0529	158.238
AABR07029732.1	0.45443	-0.953052	2.1804	-0.437101	0.662038	0.999739	0.999739	0.887516	0.890397	0.86664	0	0.990886	0	0	0
AABR07029741.3	255.769	-0.226104	0.133385	-1.69512	0.0900519	0.999739	0.999739	273.355	270.681	306.79	254.234	243.758	274.933	214.129	208.27
AABR07029742.2	42.2791	-0.673647	0.273855	-2.45987	0.0138987	0.999739	0.999739	51.476	64.1086	50.2651	41.0619	21.7995	31.5028	40.7865	37.2326
AABR07029847.1	1.11978	-2.54279	1.62167	-1.568	0.11688	0.999739	0.999739	1.77503	4.45199	0.86664	0.873657	0.990886	0	0	0
AABR07029890.1	0.254647	0.355472	3.45713	0.102823	0.918104	0.999739	0.999739	0	0	0	0.873657	0	0	0	1.16352
AABR07029955.1	0.838469	-0.885122	2.17052	-0.407793	0.683426	0.999739	0.999739	0	1.78079	2.59992	0	0	0	0	2.32704
AABR07030019.1	43.5046	-0.0816292	0.236737	-0.344809	0.730238	0.999739	0.999739	43.4883	43.6295	41.5987	49.7985	38.6446	36.2759	42.2431	52.3583
AABR07030085.1	0.653808	2.03562	1.98476	1.02563	0.305066	0.999739	0.999739	0	0	0	0.873657	0.990886	1.90926	1.45666	0
AABR07030156.1	0.63459	-0.245381	2.06508	-0.118824	0.905415	0.999739	0.999739	1.77503	0.890397	0	0	0	0.954629	1.45666	0
AABR07030162.1	5.91095	-0.369361	0.820808	-0.449996	0.652713	0.999739	0.999739	8.87516	10.6848	6.93312	0	4.95443	4.77315	8.73996	2.32704
AABR07030335.1	0.373975	1.071	2.61691	0.409261	0.682348	0.999739	0.999739	0	0	0	0.873657	0	0.954629	0	1.16352
AABR07030375.1	1.12502	-1.67135	1.73761	-0.961869	0.336115	0.999739	0.999739	0	2.67119	2.59992	1.74731	1.98177	0	0	0
AABR07030435.1	0.677578	-0.704969	2.30503	-0.305839	0.759727	0.999739	0.999739	0	0.890397	0	2.62097	0	1.90926	0	0
AABR07030494.1	0.795142	-1.00919	1.74968	-0.576786	0.564084	0.999739	0.999739	0.887516	1.78079	0	1.74731	0.990886	0.954629	0	0
AABR07030524.1	3.77917	0.218481	0.855344	0.255431	0.79839	0.999739	0.999739	4.43758	3.56159	6.06648	0	5.94532	3.81852	2.91332	3.49055
AABR07030647.1	0.227659	0.355471	3.53381	0.100591	0.919875	0.999739	0.999739	0	0	0.86664	0	0	0.954629	0	0
AABR07030729.1	4.35358	0.102858	0.727715	0.141344	0.887598	0.999739	0.999739	1.77503	6.23278	5.19984	3.49463	5.94532	2.86389	5.82664	3.49055
AABR07030773.1	1.33355	-1.03881	1.31819	-0.788054	0.430665	0.999739	0.999739	2.66255	1.78079	0.86664	1.74731	0.990886	0	1.45666	1.16352
AABR07030781.1	2.22171	-0.810183	1.02298	-0.791982	0.428371	0.999739	0.999739	3.55007	2.67119	3.46656	1.74731	2.97266	1.90926	1.45666	0
AABR07030791.1	1.26748	-1.12468	1.60993	-0.698589	0.484809	0.999739	0.999739	2.66255	0	0	4.36829	0.990886	0.954629	0	1.16352
AABR07030793.1	0.233068	0.355471	3.53381	0.100591	0.919875	0.999739	0.999739	0	0	0	0.873657	0.990886	0	0	0
AABR07030796.1	0.228536	0.355471	3.53381	0.100591	0.919875	0.999739	0.999739	0	0	0	0.873657	0	0.954629	0	0
AABR07030823.1	22.5028	0.563533	0.409221	1.37709	0.168485	0.999739	0.999739	28.4005	19.5887	12.9996	11.3575	21.7995	17.1833	29.1332	39.5596
AABR07030861.1	169.005	-0.0427966	0.175166	-0.24432	0.806983	0.999739	0.999739	180.166	146.916	213.193	145.901	169.442	185.198	176.256	134.968
AABR07030911.1	3.71784	-2.53334	1.32356	-1.91403	0.0556166	0.999739	0.999739	9.76268	0.890397	14.7329	0	0.990886	1.90926	1.45666	0
AABR07031278.1	0.333899	-1.68785	3.48332	-0.484552	0.627994	0.999739	0.999739	0	2.67119	0	0	0	0	0	0
AABR07031480.1	498.41	-0.0810808	0.115122	-0.704306	0.481242	0.999739	0.999739	472.159	516.43	500.051	562.635	540.033	453.449	422.431	520.092
AABR07031491.2	5866.97	0.123145	0.0974103	1.26419	0.206162	0.999739	0.999739	5336.64	5783.13	5080.24	6265.87	5446.9	6472.38	6404.93	6145.7
AABR07031505.1	0.21963	-1.08482	3.53315	-0.307039	0.758813	0.999739	0.999739	0	0.890397	0.86664	0	0	0	0	0
AABR07031521.1	10.5755	0.306052	0.51743	0.591485	0.554195	0.999739	0.999739	14.2003	3.56159	11.2663	8.73657	12.8815	12.4102	14.5666	6.98111
AABR07031666.1	24.3666	0.0935224	0.314819	0.297067	0.766415	0.999739	0.999739	23.9629	25.8215	26.8658	17.4731	28.7357	19.0926	26.2199	26.7609
AABR07031674.2	0.358661	1.03518	3.14693	0.32895	0.742194	0.999739	0.999739	0.887516	0	0	0	1.98177	0	0	0
AABR07031724.1	5.31455	-0.463237	0.644413	-0.718851	0.472233	0.999739	0.999739	4.43758	5.34238	6.06648	8.73657	2.97266	4.77315	4.36998	5.81759
AABR07031963.1	0.401712	-0.363883	2.57884	-0.141103	0.887788	0.999739	0.999739	0	0.890397	0.86664	0	0	0	1.45666	0
AABR07032097.1	135.989	0.238776	0.185213	1.2892	0.197329	0.999739	0.999739	127.802	144.244	119.596	108.333	189.259	145.104	138.383	115.188
AABR07032255.1	13.1697	-0.542919	0.469719	-1.15584	0.247748	0.999739	0.999739	20.4129	21.3695	12.133	8.73657	7.92709	15.2741	10.1966	9.30814
AABR07032255.2	312.737	-0.376192	0.178254	-2.11042	0.034822	0.999739	0.999739	401.157	345.474	415.987	251.613	281.412	319.801	254.915	231.54
AABR07032277.1	1.73636	-1.13795	1.30942	-0.869051	0.384819	0.999739	0.999739	0	2.67119	5.19984	1.74731	0.990886	0.954629	0	2.32704
AABR07032328.1	2.6108	0.990134	1.11697	0.886448	0.375376	0.999739	0.999739	3.55007	0.890397	0.86664	1.74731	0	8.59166	2.91332	2.32704
AABR07032392.1	5.31732	-0.96515	0.752952	-1.28182	0.199905	0.999739	0.999739	6.21261	10.6848	7.79976	3.49463	4.95443	0.954629	1.45666	6.98111
AABR07032520.1	414.603	-0.0428158	0.100216	-0.427236	0.669207	0.999739	0.999739	425.12	448.76	425.52	383.535	392.391	402.853	397.668	440.973
AABR07032520.4	1.62861	-0.143732	1.14852	-0.125145	0.900409	0.999739	0.999739	1.77503	0.890397	1.73328	2.62097	1.98177	2.86389	0	1.16352
AABR07032532.1	4.73212	0.0968576	0.658949	0.146988	0.883142	0.999739	0.999739	3.55007	4.45199	5.19984	5.24194	4.95443	5.72777	2.91332	5.81759
AABR07032856.1	6.29369	0.375261	0.648572	0.578596	0.562862	0.999739	0.999739	8.87516	2.67119	3.46656	6.98926	4.95443	11.4555	7.2833	4.65407
AABR07033045.1	0.339835	-0.367954	2.69807	-0.136377	0.891523	0.999739	0.999739	0	0.890397	0	0.873657	0	0.954629	0	0
AABR07033047.1	0.925469	0.802276	1.69451	0.473455	0.635889	0.999739	0.999739	1.77503	0.890397	0	0	0	0.954629	1.45666	2.32704
AABR07033162.1	1.20401	-0.264014	1.3188	-0.200192	0.84133	0.999739	0.999739	0.887516	1.78079	1.73328	0.873657	0.990886	1.90926	1.45666	0
AABR07033271.1	0.452867	-0.963209	2.48978	-0.386865	0.698856	0.999739	0.999739	0.887516	1.78079	0	0	0	0.954629	0	0
AABR07033287.1	4.98215	0.468873	0.693687	0.675914	0.499095	0.999739	0.999739	7.10013	5.34238	1.73328	2.62097	6.9362	4.77315	4.36998	6.98111
AABR07033324.1	16.1183	-0.177802	0.375854	-0.473062	0.636169	0.999739	0.999739	18.6378	21.3695	15.5995	13.1049	15.8542	15.2741	11.6533	17.4528
AABR07033987.1	2.85521	-0.0307931	0.890153	-0.0345931	0.972404	0.999739	0.999739	1.77503	5.34238	1.73328	2.62097	2.97266	2.86389	4.36998	1.16352
AABR07034315.1	2.10401	-0.488986	1.02963	-0.474913	0.634849	0.999739	0.999739	0.887516	2.67119	3.46656	2.62097	0.990886	0.954629	2.91332	2.32704
AABR07034362.1	1.00876	0.357533	1.42835	0.250311	0.802346	0.999739	0.999739	0	0.890397	0.86664	1.74731	0.990886	0.954629	1.45666	1.16352
AABR07034438.1	291.067	0.223008	0.194449	1.14687	0.251436	0.999739	0.999739	224.542	265.338	209.727	374.799	257.63	356.077	314.638	325.785
AABR07034445.1	7.27007	-0.70194	0.547931	-1.28107	0.200168	0.999739	0.999739	10.6502	7.12318	9.53304	8.73657	4.95443	6.6824	5.82664	4.65407
AABR07034639.1	1317.94	-0.135524	0.165476	-0.818996	0.412789	0.999739	0.999739	1508.78	1410.39	1647.48	954.033	1395.17	1333.62	1073.56	1220.53
AABR07034641.1	0.256379	0.355472	3.44932	0.103056	0.917919	0.999739	0.999739	0.887516	0	0	0	0	0	0	1.16352
AABR07034648.1	4.5062	0.00348469	0.795112	0.00438265	0.996503	0.999739	0.999739	2.66255	8.01357	3.46656	3.49463	0.990886	2.86389	8.73996	5.81759
AABR07034657.1	2.16623	-0.665367	1.18129	-0.563254	0.573262	0.999739	0.999739	1.77503	5.34238	1.73328	1.74731	0	3.81852	2.91332	0
AABR07034706.1	5.97322	-0.27612	0.661386	-0.417486	0.676323	0.999739	0.999739	6.21261	7.12318	8.6664	4.36829	10.8997	3.81852	4.36998	2.32704
AABR07035091.1	0.723572	1.24206	2.01125	0.617557	0.536868	0.999739	0.999739	0.887516	0	0	0.873657	0	2.86389	0	1.16352
AABR07035218.1	1759.46	-0.0615383	0.0979084	-0.62853	0.529657	0.999739	0.999739	1645.46	1945.52	1936.94	1661.7	1887.64	1737.42	1646.03	1614.96
AABR07035338.1	584.384	-0.0584231	0.0920344	-0.634797	0.525561	0.999739	0.999739	560.91	619.716	565.916	638.643	547.96	584.233	554.987	602.702
AABR07035357.2	0.230268	0.355471	3.53381	0.100591	0.919875	0.999739	0.999739	0.887516	0	0	0	0	0.954629	0	0
AABR07035383.1	0.460726	0.312245	2.23871	0.139476	0.889074	0.999739	0.999739	0	0	0.86664	0.873657	0.990886	0.954629	0	0
AABR07035428.2	530.788	-0.0346881	0.102532	-0.338315	0.735126	0.999739	0.999739	566.235	505.746	545.983	528.563	487.516	480.178	549.161	582.922
AABR07035541.3	0.860156	-0.0755342	1.70939	-0.0441878	0.964755	0.999739	0.999739	1.77503	0	0.86664	0.873657	0	1.90926	1.45666	0
AABR07035561.2	0.473916	-0.94683	2.15908	-0.438533	0.661	0.999739	0.999739	0.887516	0	0.86664	0.873657	0	0	0	1.16352
AABR07035787.1	2065.15	-0.072513	0.100495	-0.72156	0.470565	0.999739	0.999739	2346.59	1989.15	1898.81	2232.19	2062.03	1798.52	2084.48	2109.46
AABR07035832.1	0.438822	1.17572	2.53396	0.463986	0.642658	0.999739	0.999739	0	0.890397	0	0	0	0	1.45666	1.16352
AABR07035839.1	96.234	-0.0624015	0.248538	-0.251074	0.801757	0.999739	0.999739	78.1014	99.7245	77.1309	137.164	66.3894	90.6898	119.446	101.226
AABR07036463.1	4.93873	0.0548363	0.690525	0.0794124	0.936705	0.999739	0.999739	5.3251	3.56159	2.59992	7.86291	5.94532	2.86389	4.36998	6.98111
AABR07036550.1	13.2963	-0.718418	0.426756	-1.68344	0.0922896	0.999739	0.999739	21.3004	14.2464	12.133	18.3468	7.92709	11.4555	11.6533	9.30814
AABR07036567.1	0.438044	-2.08266	2.43578	-0.855025	0.392537	0.999739	0.999739	0	0.890397	0.86664	1.74731	0	0	0	0
AABR07036855.1	191.88	0.054996	0.144007	0.3819	0.702536	0.999739	0.999739	161.528	217.257	190.661	183.468	214.031	192.835	205.389	169.874
AABR07037203.1	54.7103	0.0771378	0.217312	0.354963	0.722618	0.999739	0.999739	55.9135	48.9718	44.1986	63.777	60.4441	53.4592	59.723	51.1948
AABR07037243.1	1.09822	0.614874	1.5492	0.396898	0.691443	0.999739	0.999739	1.77503	0	0	1.74731	1.98177	0.954629	0	2.32704
AABR07037343.1	4.70347	-0.169471	0.771524	-0.219658	0.826138	0.999739	0.999739	9.76268	2.67119	4.3332	3.49463	5.94532	7.63703	1.45666	2.32704
AABR07037406.1	0.58668	0.813696	2.0945	0.388492	0.697652	0.999739	0.999739	0	0.890397	0.86664	0	1.98177	0.954629	0	0
AABR07037412.1	0.328477	-1.66751	2.65645	-0.62772	0.530187	0.999739	0.999739	0.887516	0	0.86664	0.873657	0	0	0	0
AABR07037489.1	345.557	0.0907836	0.111433	0.814689	0.41525	0.999739	0.999739	334.594	328.556	302.457	373.925	341.856	371.351	333.575	378.143
AABR07037520.1	2433.38	-0.0729006	0.085424	-0.853396	0.393439	0.999739	0.999739	2522.32	2206.4	2491.59	2759.01	2405.87	2356.02	2374.36	2351.47
AABR07037798.1	0.34313	-0.363813	2.69029	-0.135232	0.892429	0.999739	0.999739	0.887516	0	0.86664	0	0.990886	0	0	0
AABR07037800.1	0.412711	1.07094	2.55604	0.418985	0.675227	0.999739	0.999739	0	0.890397	0	0	0	0.954629	1.45666	0
AABR07037995.1	115.926	-0.136544	0.278162	-0.490878	0.623512	0.999739	0.999739	86.0891	123.765	90.1305	185.215	72.3347	118.374	116.533	134.968
AABR07037998.1	0.376068	1.07099	2.61296	0.409878	0.681895	0.999739	0.999739	0	0.890397	0	0	0	0.954629	0	1.16352
AABR07038019.1	4.1303	0.468831	0.7496	0.625442	0.531681	0.999739	0.999739	3.55007	3.56159	5.19984	1.74731	6.9362	4.77315	1.45666	5.81759
AABR07038029.1	11.8842	-0.533202	0.511947	-1.04152	0.297635	0.999739	0.999739	7.10013	16.9175	20.7994	11.3575	5.94532	14.3194	11.6533	6.98111
AABR07038269.1	0.227659	0.355471	3.53381	0.100591	0.919875	0.999739	0.999739	0	0	0.86664	0	0	0.954629	0	0
AABR07038355.1	14.3983	0.637551	0.425194	1.49944	0.13376	0.999739	0.999739	9.76268	12.4656	13.8662	8.73657	21.7995	9.54629	20.3932	18.6163
AABR07038477.1	0.238657	1.72432	3.52712	0.488875	0.62493	0.999739	0.999739	0	0	0	0	0	1.90926	0	0
AABR07038849.1	1.48327	1.27801	1.3466	0.94906	0.34259	0.999739	0.999739	0.887516	0.890397	0.86664	0.873657	0	5.72777	1.45666	1.16352
AABR07038871.1	3.74291	-0.149636	0.852535	-0.175519	0.860672	0.999739	0.999739	6.21261	1.78079	4.3332	3.49463	7.92709	0.954629	2.91332	2.32704
AABR07038881.1	1.08833	-0.641186	1.60378	-0.399797	0.689306	0.999739	0.999739	0.887516	1.78079	2.59992	0	1.98177	0	1.45666	0
AABR07038930.1	3.61283	0.250687	0.859431	0.29169	0.770524	0.999739	0.999739	0.887516	3.56159	1.73328	6.98926	2.97266	2.86389	2.91332	6.98111
AABR07038983.1	3.05153	-0.620869	0.85824	-0.723421	0.469421	0.999739	0.999739	4.43758	5.34238	2.59992	2.62097	2.97266	3.81852	1.45666	1.16352
AABR07039058.1	170.557	0.345139	0.227183	1.51921	0.128709	0.999739	0.999739	127.802	175.408	201.927	95.2286	191.241	156.559	212.672	203.616
AABR07039133.2	3.14746	-0.124727	0.956755	-0.130365	0.896278	0.999739	0.999739	5.3251	2.67119	5.19984	0	3.96354	1.90926	1.45666	4.65407
AABR07039210.1	106.613	0.101605	0.616764	0.164739	0.869149	0.999739	0.999739	57.6886	141.573	31.199	180.847	52.517	111.692	117.989	159.402
AABR07039210.2	1164.06	0.0722339	0.0912882	0.791274	0.428784	0.999739	0.999739	1191.93	1066.7	1075.5	1203.9	1176.18	1086.37	1219.22	1292.67
AABR07039218.1	22.4088	0.0975259	0.343223	0.284147	0.776297	0.999739	0.999739	15.0878	27.6023	25.1325	19.2205	21.7995	30.5481	18.9366	20.9433
AABR07039218.2	3.08582	0.000240812	0.92099	0.00026147	0.999791	0.999938	0.999938	3.55007	0.890397	1.73328	6.1156	4.95443	1.90926	4.36998	1.16352
AABR07039304.1	0.974255	-0.391329	1.44926	-0.27002	0.787145	0.999739	0.999739	0.887516	0.890397	0.86664	1.74731	0.990886	0.954629	1.45666	0
AABR07039316.1	251.209	-0.0372394	0.209357	-0.177876	0.858821	0.999739	0.999739	219.217	286.708	308.524	205.309	300.239	281.616	160.233	247.829
AABR07039325.1	9.6387	-0.00648155	0.527388	-0.0122899	0.990194	0.999739	0.999739	15.9753	7.12318	10.3997	5.24194	10.8997	11.4555	10.1966	5.81759
AABR07039328.2	632.557	0.0865495	0.118826	0.728373	0.466385	0.999739	0.999739	663.862	617.936	648.246	523.321	715.42	577.551	702.11	612.01
AABR07039334.1	584.663	0.134896	0.174324	0.773824	0.439035	0.999739	0.999739	572.448	501.294	444.586	709.41	482.562	567.05	718.133	681.821
AABR07039336.2	1723.95	0.052159	0.122054	0.427342	0.66913	0.999739	0.999739	1477.71	1718.47	1767.08	1810.22	2028.34	1894.94	1595.04	1499.77
AABR07039336.3	0.590852	0.81011	2.39566	0.338158	0.735244	0.999739	0.999739	0.887516	0	0.86664	0	2.97266	0	0	0
AABR07039356.1	2.8318	-0.530168	0.933142	-0.568153	0.569931	0.999739	0.999739	4.43758	1.78079	1.73328	5.24194	2.97266	0.954629	4.36998	1.16352
AABR07039446.2	47.993	-0.154941	0.243059	-0.637463	0.523823	0.999739	0.999739	50.5884	59.6566	53.7317	38.4409	36.6628	53.4592	43.6998	47.7042
AABR07039447.1	0.410618	1.07095	2.5595	0.418421	0.67564	0.999739	0.999739	0	0	0	0.873657	0	0.954629	1.45666	0
AABR07039648.1	8.93033	0.337183	0.545506	0.618111	0.536502	0.999739	0.999739	4.43758	8.90397	13.8662	4.36829	10.8997	8.59166	8.73996	11.6352
AABR07039936.1	0.222599	-1.09825	3.53247	-0.310901	0.755876	0.999739	0.999739	0	1.78079	0	0	0	0	0	0
AABR07040127.1	0.373975	1.071	2.61691	0.409261	0.682348	0.999739	0.999739	0	0	0	0.873657	0	0.954629	0	1.16352
AABR07040412.1	68.2493	0.294505	0.323933	0.909154	0.363269	0.999739	0.999739	50.5884	50.7526	42.4653	100.471	54.4987	55.3685	103.423	88.4273
AABR07040622.1	0.347864	1.00519	3.17632	0.316464	0.751651	0.999739	0.999739	0	0	0	0.873657	0	1.90926	0	0
AABR07040624.1	1.71635	-1.16313	1.14803	-1.01316	0.310986	0.999739	0.999739	1.77503	2.67119	2.59992	2.62097	0.990886	1.90926	0	1.16352
AABR07040855.1	510.065	0.0596291	0.122063	0.488509	0.625189	0.999739	0.999739	478.371	478.143	567.649	475.269	615.34	505.953	490.894	468.898
AABR07040864.1	242.398	-0.152746	0.123502	-1.23679	0.216167	0.999739	0.999739	259.155	281.365	252.192	229.772	233.849	238.657	201.019	243.175
AABR07040887.1	3.42222	-0.825943	0.894175	-0.923692	0.355647	0.999739	0.999739	2.66255	2.67119	3.46656	8.73657	0.990886	4.77315	2.91332	1.16352
AABR07040892.1	2.45456	-0.999367	0.95617	-1.04518	0.295941	0.999739	0.999739	2.66255	2.67119	4.3332	3.49463	0.990886	2.86389	1.45666	1.16352
AABR07040938.1	4.59617	0.561759	0.68372	0.821621	0.411293	0.999739	0.999739	3.55007	2.67119	6.06648	2.62097	5.94532	5.72777	4.36998	5.81759
AABR07040944.1	0.499929	1.58289	2.12599	0.744541	0.45655	0.999739	0.999739	0	0.890397	0	0	0.990886	0.954629	0	1.16352
AABR07040947.1	9.69804	0.00370548	0.601711	0.00615825	0.995086	0.999739	0.999739	7.98765	10.6848	9.53304	10.4839	6.9362	16.2287	14.5666	1.16352
AABR07041089.1	12.9449	-0.269989	0.515922	-0.523314	0.600756	0.999739	0.999739	17.7503	10.6848	21.666	6.1156	13.8724	6.6824	17.4799	9.30814
AABR07041109.1	5.42065	-0.273897	0.759154	-0.360792	0.718255	0.999739	0.999739	2.66255	11.5752	3.46656	6.1156	3.96354	8.59166	5.82664	1.16352
AABR07041140.1	3.09328	0.00273091	0.868777	0.00314339	0.997492	0.999785	0.999785	2.66255	1.78079	2.59992	5.24194	0.990886	4.77315	4.36998	2.32704
AABR07041403.1	1.04862	2.7699	1.80821	1.53184	0.125561	0.999739	0.999739	0	0	0	0.873657	1.98177	0	4.36998	1.16352
AABR07041600.1	6.08214	1.41073	0.694948	2.02998	0.0423583	0.999739	0.999739	4.43758	3.56159	1.73328	3.49463	2.97266	8.59166	8.73996	15.1257
AABR07041778.1	1.44325	-1.20517	1.34409	-0.896645	0.369908	0.999739	0.999739	4.43758	0.890397	1.73328	0.873657	0.990886	0	1.45666	1.16352
AABR07041972.1	0.227659	0.355471	3.53381	0.100591	0.919875	0.999739	0.999739	0	0	0.86664	0	0	0.954629	0	0
AABR07042471.1	0.402589	-0.367873	2.57798	-0.142698	0.886529	0.999739	0.999739	0	0.890397	0	0.873657	0	0	1.45666	0
AABR07042733.2	4.44346	0.0280876	0.797994	0.0351978	0.971922	0.999739	0.999739	1.77503	2.67119	2.59992	10.4839	2.97266	5.72777	5.82664	3.49055
AABR07042892.1	0.398742	-0.358313	3.0509	-0.117445	0.906507	0.999739	0.999739	0	0	1.73328	0	0	0	1.45666	0
AABR07042903.1	2.76767	-0.566177	0.911111	-0.621414	0.534327	0.999739	0.999739	2.66255	2.67119	1.73328	6.1156	2.97266	1.90926	2.91332	1.16352
AABR07042915.1	1.31002	1.56107	1.55496	1.00393	0.315413	0.999739	0.999739	1.77503	0	0	0.873657	3.96354	0.954629	2.91332	0
AABR07042936.1	8.96345	-0.365432	0.612722	-0.596407	0.550903	0.999739	0.999739	5.3251	8.90397	19.9327	6.1156	11.8906	3.81852	8.73996	6.98111
AABR07043114.1	0.217537	-1.08269	3.53326	-0.306427	0.759279	0.999739	0.999739	0	0	0.86664	0.873657	0	0	0	0
AABR07043167.1	2.33881	1.00053	1.08634	0.921012	0.357044	0.999739	0.999739	0.887516	4.45199	0	0.873657	1.98177	3.81852	4.36998	2.32704
AABR07043389.1	31.4696	0.0320056	0.294301	0.108751	0.9134	0.999739	0.999739	24.8505	40.0679	32.0657	27.957	40.6263	27.6842	24.7632	33.742
AABR07043557.1	1.93404	-0.0592693	1.1245	-0.052707	0.957965	0.999739	0.999739	0.887516	5.34238	0.86664	0.873657	2.97266	1.90926	1.45666	1.16352
AABR07043711.1	18.9368	-0.126992	0.403285	-0.314893	0.752843	0.999739	0.999739	18.6378	27.6023	15.5995	16.5995	8.91798	18.138	26.2199	19.7798
AABR07043813.1	1.13216	2.08005	1.64002	1.26831	0.204688	0.999739	0.999739	0	0.890397	0	0.873657	2.97266	2.86389	1.45666	0
AABR07043818.1	0.561354	-1.37179	2.3743	-0.577767	0.563422	0.999739	0.999739	2.66255	0	0	0.873657	0	0.954629	0	0
AABR07044001.2	0.487715	0.368049	2.49966	0.147239	0.882943	0.999739	0.999739	0	0	0	1.74731	0.990886	0	0	1.16352
AABR07044301.1	1.02507	-0.758495	2.08081	-0.364519	0.715471	0.999739	0.999739	0	0	1.73328	3.49463	2.97266	0	0	0
AABR07044308.2	0.243189	1.73991	3.50254	0.496756	0.619361	0.999739	0.999739	0	0	0	0	0.990886	0.954629	0	0
AABR07044375.1	1.45926	0.300314	1.4703	0.204254	0.838155	0.999739	0.999739	3.55007	0	1.73328	0	0.990886	1.90926	0	3.49055
AABR07044383.1	13.589	-0.349077	0.464915	-0.75084	0.452749	0.999739	0.999739	20.4129	11.5752	12.133	17.4731	18.8268	14.3194	5.82664	8.14462
AABR07044388.2	230.239	-0.243843	0.142332	-1.7132	0.0866751	0.999739	0.999739	263.592	208.353	246.992	280.444	201.15	216.701	184.996	239.685
AABR07044397.1	0.232191	0.355471	3.53381	0.100591	0.919875	0.999739	0.999739	0	0	0.86664	0	0.990886	0	0	0
AABR07044408.3	2.17312	-0.335403	1.0941	-0.306555	0.759182	0.999739	0.999739	4.43758	3.56159	0	1.74731	0.990886	2.86389	1.45666	2.32704
AABR07044570.2	9.9976	0.0301857	0.703039	0.042936	0.965753	0.999739	0.999739	16.8628	16.9175	3.46656	2.62097	8.91798	14.3194	2.91332	13.9622
AABR07044593.1	3.04999	0.436753	1.12186	0.38931	0.697047	0.999739	0.999739	5.3251	1.78079	3.46656	0	6.9362	5.72777	0	1.16352
AABR07044631.2	30.7791	-0.250275	0.308697	-0.810745	0.417512	0.999739	0.999739	30.1756	39.1775	28.5991	36.6936	27.7448	41.049	21.8499	20.9433
AABR07044759.1	44.6998	0.0600543	0.239098	0.25117	0.801683	0.999739	0.999739	32.8381	48.9718	49.3985	43.6829	42.6081	48.6861	49.5264	41.8866
AABR07044804.1	0.256379	0.355472	3.44932	0.103056	0.917919	0.999739	0.999739	0.887516	0	0	0	0	0	0	1.16352
AABR07044805.2	0.336866	-0.36181	2.70402	-0.133805	0.893557	0.999739	0.999739	0	0	0.86664	0.873657	0	0.954629	0	0
AABR07044900.1	28.8675	0.398167	0.395009	1.008	0.313456	0.999739	0.999739	17.7503	34.7255	17.3328	29.7043	14.8633	39.1398	32.0465	45.3772
AABR07044940.1	0.891258	-2.17025	1.70658	-1.27169	0.203482	0.999739	0.999739	0.887516	0.890397	0.86664	3.49463	0.990886	0	0	0
AABR07044959.1	14.9532	0.19019	0.419419	0.45346	0.650218	0.999739	0.999739	16.8628	16.0271	14.7329	8.73657	21.7995	15.2741	8.73996	17.4528
AABR07044977.1	0.301411	1.79275	3.26807	0.548565	0.583304	0.999739	0.999739	0	0	0	0	0	0.954629	1.45666	0
AABR07045032.1	17.9543	-0.373762	0.403537	-0.926217	0.354333	0.999739	0.999739	26.6255	20.4791	23.3993	10.4839	16.8451	11.4555	14.5666	19.7798
AABR07045058.1	6.01422	0.154724	0.599054	0.25828	0.796191	0.999739	0.999739	4.43758	5.34238	8.6664	4.36829	7.92709	5.72777	5.82664	5.81759
AABR07045321.1	0.238657	1.72432	3.52712	0.488875	0.62493	0.999739	0.999739	0	0	0	0	0	1.90926	0	0
AABR07045370.1	1.36446	0.57854	1.34648	0.429668	0.667437	0.999739	0.999739	0	2.67119	1.73328	0	1.98177	1.90926	1.45666	1.16352
AABR07045373.2	2.76781	-0.990971	1.02511	-0.966698	0.333695	0.999739	0.999739	6.21261	1.78079	6.06648	0.873657	2.97266	1.90926	0	2.32704
AABR07045399.1	0.23516	0.355471	3.53381	0.100591	0.919875	0.999739	0.999739	0	0.890397	0	0	0.990886	0	0	0
AABR07045431.1	280.549	-0.094913	0.141886	-0.668939	0.503534	0.999739	0.999739	328.381	275.133	314.59	242.003	306.184	279.706	262.199	236.194
AABR07045462.1	12.8189	0.0234982	0.473959	0.0495786	0.960458	0.999739	0.999739	18.6378	9.79437	12.9996	9.61023	15.8542	8.59166	7.2833	19.7798
AABR07045621.1	108.724	-0.262774	0.233746	-1.12419	0.260933	0.999739	0.999739	118.927	128.217	139.529	87.3657	114.943	63.9601	94.6829	122.169
AABR07046657.1	6.91532	-0.0684564	0.555399	-0.123256	0.901904	0.999739	0.999739	7.98765	7.12318	5.19984	7.86291	4.95443	7.63703	8.73996	5.81759
AABR07046707.1	4053.08	-0.000453906	0.0745235	-0.00609077	0.99514	0.999739	0.999739	3869.57	4036.17	4049.81	4261.7	4105.24	4370.29	3950.46	3781.43
AABR07046763.1	1.08454	1.96618	1.81658	1.08236	0.279095	0.999739	0.999739	0	0	0	1.74731	1.98177	0	1.45666	3.49055
AABR07047219.1	3.54633	-0.678241	0.776967	-0.872934	0.382699	0.999739	0.999739	3.55007	5.34238	5.19984	3.49463	2.97266	2.86389	1.45666	3.49055
AABR07047462.1	1.83691	-0.62144	1.13348	-0.54826	0.583514	0.999739	0.999739	1.77503	2.67119	2.59992	1.74731	0	0.954629	1.45666	3.49055
AABR07047835.1	6.97387	0.243335	0.623812	0.390078	0.696479	0.999739	0.999739	4.43758	7.12318	8.6664	5.24194	1.98177	11.4555	8.73996	8.14462
AABR07048031.1	1.32113	0.955752	1.37893	0.693113	0.488239	0.999739	0.999739	1.77503	1.78079	0	0	1.98177	0.954629	2.91332	1.16352
AABR07048253.1	1.70516	-1.69924	1.2606	-1.34796	0.17767	0.999739	0.999739	3.55007	2.67119	2.59992	1.74731	0	1.90926	0	1.16352
AABR07048280.1	0.748689	-0.644919	1.80245	-0.357802	0.720491	0.999739	0.999739	0.887516	1.78079	0	0.873657	0.990886	0	1.45666	0
AABR07048387.1	1.44678	-0.645151	1.22436	-0.526927	0.598244	0.999739	0.999739	0.887516	1.78079	3.46656	0.873657	0.990886	0.954629	1.45666	1.16352
AABR07048397.1	0.513119	0.430243	2.48099	0.173416	0.862325	0.999739	0.999739	0.887516	0.890397	0	0	0	0	0	2.32704
AABR07048653.1	2.97904	-0.507476	0.858601	-0.591049	0.554487	0.999739	0.999739	2.66255	4.45199	3.46656	3.49463	0.990886	3.81852	1.45666	3.49055
AABR07049043.1	1.6962	0.608805	1.19756	0.508372	0.611193	0.999739	0.999739	1.77503	0.890397	1.73328	0.873657	2.97266	0.954629	4.36998	0
AABR07049060.1	117.684	0.165087	0.154966	1.06531	0.286735	0.999739	0.999739	113.602	121.094	97.0636	111.828	135.751	112.646	129.643	119.842
AABR07049134.1	2.13349	1.1815	1.02852	1.14874	0.250663	0.999739	0.999739	2.66255	0.890397	0.86664	0.873657	3.96354	2.86389	1.45666	3.49055
AABR07049134.4	2.55449	0.101687	0.958921	0.106044	0.915548	0.999739	0.999739	4.43758	0.890397	2.59992	1.74731	0.990886	1.90926	4.36998	3.49055
AABR07049149.1	8.74974	-0.309381	0.51936	-0.595697	0.551378	0.999739	0.999739	11.5377	8.01357	7.79976	11.3575	6.9362	5.72777	5.82664	12.7987
AABR07049223.1	0.520681	0.350857	2.1861	0.160494	0.872492	0.999739	0.999739	0.887516	0	0.86664	0	0	0.954629	1.45666	0
AABR07049329.1	11.4671	-0.117263	0.561345	-0.208897	0.834529	0.999739	0.999739	7.10013	23.1503	11.2663	6.1156	11.8906	5.72777	10.1966	16.2892
AABR07049348.1	1.23078	0.789656	1.5797	0.499878	0.617161	0.999739	0.999739	0.887516	0	1.73328	0.873657	1.98177	0	4.36998	0
AABR07049499.1	4.63348	-1.66354	0.790265	-2.10503	0.0352884	0.999739	0.999739	6.21261	8.90397	3.46656	9.61023	2.97266	0.954629	1.45666	3.49055
AABR07049503.1	0.906282	0.0761589	2.19735	0.0346594	0.972351	0.999739	0.999739	0	0	3.46656	0	0	0	1.45666	2.32704
AABR07049516.1	1.34123	-0.4651	1.3907	-0.334435	0.738051	0.999739	0.999739	2.66255	2.67119	0.86664	0	0	1.90926	1.45666	1.16352
AABR07049554.2	0.376068	1.07099	2.61296	0.409878	0.681895	0.999739	0.999739	0	0.890397	0	0	0	0.954629	0	1.16352
AABR07049821.2	27.8226	0.351983	0.280244	1.25599	0.209119	0.999739	0.999739	27.513	24.0407	24.2659	21.8414	33.6901	28.6389	33.5032	29.0879
AABR07050084.1	123.286	-0.612633	1.1574	-0.529319	0.596584	0.999739	0.999739	10.6502	205.682	189.794	190.457	186.287	180.425	10.1966	12.7987
AABR07050222.1	11.2683	0.466162	0.439686	1.06021	0.289047	0.999739	0.999739	10.6502	8.01357	9.53304	9.61023	9.90886	16.2287	14.5666	11.6352
AABR07051240.1	0.561545	-1.36096	2.05646	-0.661799	0.5081	0.999739	0.999739	0.887516	0	0.86664	1.74731	0.990886	0	0	0
AABR07051376.1	836.699	0.163537	0.0843506	1.93878	0.0525285	0.999739	0.999739	729.538	759.509	831.974	835.216	888.825	851.529	904.586	892.418
AABR07051395.1	4.50391	0.0914158	0.700022	0.13059	0.8961	0.999739	0.999739	4.43758	2.67119	6.93312	3.49463	5.94532	3.81852	2.91332	5.81759
AABR07051399.1	4.0371	0.0195298	0.79286	0.0246321	0.980348	0.999739	0.999739	5.3251	3.56159	2.59992	4.36829	2.97266	0.954629	4.36998	8.14462
AABR07051450.1	1884.72	0.106269	0.0865703	1.22755	0.219616	0.999739	0.999739	1986.26	1806.62	1637.95	1831.19	2048.16	1973.22	1972.32	1822.07
AABR07051787.1	131.703	-0.140354	0.211613	-0.663261	0.507164	0.999739	0.999739	136.678	169.175	129.996	116.196	161.514	99.2814	144.209	96.572
AABR07051796.1	0.37763	1.08918	2.61312	0.416814	0.676814	0.999739	0.999739	0	0	0.86664	0	0.990886	0	0	1.16352
AABR07051831.1	0.595586	1.91845	2.26838	0.845736	0.3977	0.999739	0.999739	0	0	0	0.873657	1.98177	1.90926	0	0
AABR07052084.1	1.72387	-0.358736	1.38709	-0.258626	0.795924	0.999739	0.999739	4.43758	0	1.73328	1.74731	3.96354	1.90926	0	0
AABR07052085.2	2.27587	-0.783674	1.07446	-0.729369	0.465776	0.999739	0.999739	3.55007	6.23278	0.86664	0.873657	0.990886	1.90926	1.45666	2.32704
AABR07052130.1	1.69899	-0.777795	1.39293	-0.558387	0.57658	0.999739	0.999739	0	3.56159	2.59992	2.62097	0.990886	3.81852	0	0
AABR07052327.1	1.04349	-1.45378	1.63229	-0.890642	0.373121	0.999739	0.999739	1.77503	2.67119	0	1.74731	0.990886	0	0	1.16352
AABR07052430.1	1.75525	0.0738285	1.16619	0.0633075	0.949522	0.999739	0.999739	1.77503	0.890397	3.46656	0.873657	3.96354	1.90926	0	1.16352
AABR07052486.1	110.496	-0.042684	0.180908	-0.235943	0.813477	0.999739	0.999739	133.127	106.848	122.196	85.6184	102.061	105.009	120.903	108.207
AABR07052519.1	2.15305	-0.65982	1.02086	-0.646336	0.518062	0.999739	0.999739	2.66255	2.67119	4.3332	0.873657	0.990886	1.90926	1.45666	2.32704
AABR07052523.1	12.391	0.184257	0.44605	0.413086	0.679543	0.999739	0.999739	9.76268	8.01357	12.133	16.5995	10.8997	18.138	13.1099	10.4717
AABR07052859.1	0.388629	2.29304	2.52009	0.909903	0.362874	0.999739	0.999739	0	0	0	0	0.990886	0.954629	0	1.16352
AABR07053065.1	0.561027	-1.35972	2.05665	-0.661133	0.508527	0.999739	0.999739	0	0.890397	1.73328	0.873657	0.990886	0	0	0
AABR07053166.1	16.5317	-0.663953	0.768926	-0.863481	0.387873	0.999739	0.999739	27.513	13.356	31.199	8.73657	23.7813	0	21.8499	5.81759
AABR07053185.1	329.772	-0.0184011	0.115778	-0.158934	0.873721	0.999739	0.999739	347.019	335.68	345.789	297.043	331.947	299.754	371.448	309.496
AABR07053188.1	0.936298	1.68484	1.62088	1.03946	0.29859	0.999739	0.999739	0.887516	0	0	0.873657	0.990886	0.954629	1.45666	2.32704
AABR07053472.1	263.334	0.0880048	0.133065	0.661365	0.508378	0.999739	0.999739	218.329	228.832	292.058	282.191	279.43	273.979	266.569	265.282
AABR07053516.1	268.162	-0.00328108	0.145842	-0.0224976	0.982051	0.999739	0.999739	234.304	309.858	266.058	262.971	219.977	271.115	268.025	312.986
AABR07053716.1	1.41885	-0.19715	1.3261	-0.148669	0.881815	0.999739	0.999739	2.66255	0.890397	1.73328	0.873657	0	2.86389	0	2.32704
AABR07053734.1	0.690117	0.224021	1.98361	0.112936	0.910081	0.999739	0.999739	0.887516	0	1.73328	0	0.990886	1.90926	0	0
AABR07053734.2	4.76435	-0.880257	0.789325	-1.1152	0.264764	0.999739	0.999739	7.98765	8.01357	7.79976	0.873657	3.96354	1.90926	2.91332	4.65407
AABR07053741.1	194.529	-0.0890099	0.173819	-0.512084	0.608593	0.999739	0.999739	191.704	199.449	165.528	247.245	221.959	201.427	148.579	180.345
AABR07053749.1	1.43801	-0.659738	1.5349	-0.429824	0.667324	0.999739	0.999739	0	4.45199	1.73328	0.873657	0	0.954629	0	3.49055
AABR07053749.2	28.045	-0.0598051	0.303723	-0.196907	0.843901	0.999739	0.999739	25.738	27.6023	37.2655	23.5887	27.7448	21.0018	27.6765	33.742
AABR07053837.1	1.80652	0.392551	1.15134	0.340951	0.733141	0.999739	0.999739	1.77503	0.890397	2.59992	0.873657	0	1.90926	2.91332	3.49055
AABR07053884.1	0.254647	0.355472	3.45713	0.102823	0.918104	0.999739	0.999739	0	0	0	0.873657	0	0	0	1.16352
AABR07054000.1	264.703	0.0888969	0.121534	0.73146	0.464498	0.999739	0.999739	251.167	284.927	225.326	263.844	277.448	260.614	297.159	257.137
AABR07054189.1	71.3344	0.0434406	0.265527	0.163602	0.870045	0.999739	0.999739	79.8765	71.2318	84.064	46.3038	89.1798	55.3685	53.8964	90.7544
AABR07054262.1	7.25465	0.78028	0.555663	1.40423	0.16025	0.999739	0.999739	6.21261	5.34238	4.3332	5.24194	6.9362	6.6824	11.6533	11.6352
AABR07054266.1	1.52163	0.824726	1.31474	0.627293	0.530467	0.999739	0.999739	0.887516	0.890397	2.59992	0	2.97266	1.90926	2.91332	0
AABR07054286.1	3.33227	-0.384525	0.918835	-0.418492	0.675587	0.999739	0.999739	6.21261	1.78079	3.46656	3.49463	2.97266	0	2.91332	5.81759
AABR07054341.1	0.952779	2.651	2.07589	1.27704	0.201587	0.999739	0.999739	0	0.890397	0	0	0	3.81852	2.91332	0
AABR07054361.1	28.2438	-0.00336449	0.30287	-0.0111087	0.991137	0.999739	0.999739	21.3004	23.1503	37.2655	31.4517	25.763	30.5481	26.2199	30.2515
AABR07054362.1	19.1178	0.359864	0.457219	0.787071	0.43124	0.999739	0.999739	23.9629	17.8079	20.7994	4.36829	15.8542	23.8657	21.8499	24.4339
AABR07054367.1	423.033	-0.00291592	0.131054	-0.0222498	0.982249	0.999739	0.999739	492.572	350.816	417.72	434.208	465.717	420.991	372.905	429.338
AABR07054368.1	59.2921	0.266151	0.309216	0.860728	0.389388	0.999739	0.999739	78.1014	39.1775	69.3312	28.8307	57.4714	71.5972	61.1797	68.6475
AABR07054456.2	36.4226	-0.297682	0.298143	-0.998455	0.318059	0.999739	0.999739	40.8258	52.5334	41.5987	26.2097	34.681	31.5028	23.3066	40.7231
AABR07054469.1	0.218414	-1.0861	3.53308	-0.307408	0.758533	0.999739	0.999739	0	0	0	1.74731	0	0	0	0
AABR07054578.1	368.372	0.215563	0.189293	1.13878	0.254796	0.999739	0.999739	307.081	330.337	253.925	471.775	323.029	420.991	420.975	418.866
AABR07054614.1	22.1355	-0.365086	0.369965	-0.986812	0.323735	0.999739	0.999739	29.288	14.2464	30.3324	26.2097	24.7722	21.9565	17.4799	12.7987
AABR07055492.1	1.13671	-0.981785	1.54727	-0.634526	0.525738	0.999739	0.999739	1.77503	2.67119	0	1.74731	0.990886	1.90926	0	0
AABR07055527.1	1.26384	-1.11009	1.41446	-0.784811	0.432565	0.999739	0.999739	0	1.78079	2.59992	2.62097	0.990886	0.954629	0	1.16352
AABR07055864.2	0.228536	0.355471	3.53381	0.100591	0.919875	0.999739	0.999739	0	0	0	0.873657	0	0.954629	0	0
AABR07055919.1	68.2604	0.259461	0.283423	0.915452	0.359954	0.999739	0.999739	59.4636	73.903	78.8642	35.8199	88.1889	57.2777	93.2262	59.3394
AABR07055943.1	3.39465	0.487845	0.854235	0.57109	0.567939	0.999739	0.999739	4.43758	3.56159	1.73328	1.74731	3.96354	7.63703	2.91332	1.16352
AABR07056013.1	2.36012	-0.286749	0.974757	-0.294175	0.768624	0.999739	0.999739	3.55007	1.78079	3.46656	1.74731	1.98177	2.86389	0	3.49055
AABR07056369.1	0.447805	-0.94678	2.18672	-0.432968	0.665038	0.999739	0.999739	0.887516	0	0.86664	0.873657	0	0.954629	0	0
AABR07056503.1	3.5805	-1.44736	1.24556	-1.16201	0.24523	0.999739	0.999739	0	3.56159	9.53304	7.86291	0	4.77315	2.91332	0
AABR07056632.1	0.221879	-1.09825	3.53247	-0.310901	0.755876	0.999739	0.999739	1.77503	0	0	0	0	0	0	0
AABR07056633.1	123.04	-0.211632	0.174272	-1.21438	0.224605	0.999739	0.999739	137.565	145.135	112.663	132.796	127.824	115.51	126.729	86.1003
AABR07056668.1	0.456679	-0.961778	2.96729	-0.324127	0.745842	0.999739	0.999739	2.66255	0	0	0	0.990886	0	0	0
AABR07056686.1	22.914	0.197675	0.350086	0.564646	0.572315	0.999739	0.999739	27.513	19.5887	19.9327	18.3468	14.8633	28.6389	21.8499	32.5785
AABR07057196.1	31.7374	-0.184391	0.265459	-0.694613	0.487298	0.999739	0.999739	35.5007	35.6159	32.9323	30.578	26.7539	26.7296	32.0465	33.742
AABR07057423.1	443.381	0.0160434	0.1201	0.133584	0.893732	0.999739	0.999739	435.771	401.569	503.518	424.597	509.315	442.948	397.668	431.665
AABR07057436.1	1.73562	-1.19808	1.79106	-0.66892	0.503547	0.999739	0.999739	8.87516	0	0	0.873657	2.97266	0	0	1.16352
AABR07057460.1	13.1567	-1.17891	0.512966	-2.29822	0.0215494	0.999739	0.999739	18.6378	16.0271	24.2659	13.9785	11.8906	7.63703	11.6533	1.16352
AABR07057617.1	0.788486	-1.9591	1.89127	-1.03586	0.300267	0.999739	0.999739	2.66255	1.78079	0	0.873657	0.990886	0	0	0
AABR07057902.1	0.232191	0.355471	3.53381	0.100591	0.919875	0.999739	0.999739	0	0	0.86664	0	0.990886	0	0	0
AABR07057946.1	29.603	-0.0215371	0.320984	-0.067097	0.946504	0.999739	0.999739	29.288	20.4791	45.0653	24.4624	31.7084	26.7296	27.6765	31.415
AABR07057997.1	11.0583	-0.0903663	0.502634	-0.179786	0.857321	0.999739	0.999739	17.7503	8.90397	8.6664	10.4839	7.92709	11.4555	5.82664	17.4528
AABR07058017.2	2.22453	-0.808706	1.08845	-0.74299	0.457487	0.999739	0.999739	1.77503	2.67119	1.73328	5.24194	3.96354	0.954629	1.45666	0
AABR07058116.1	0.329354	-1.67044	3.18267	-0.524854	0.599685	0.999739	0.999739	0.887516	0	0	1.74731	0	0	0	0
AABR07058254.1	1.22134	-0.235671	1.55967	-0.151104	0.879894	0.999739	0.999739	0.887516	1.78079	0	2.62097	0.990886	0	0	3.49055
AABR07058366.1	24.7523	0.778026	0.337985	2.30195	0.0213378	0.999739	0.999739	17.7503	9.79437	23.3993	21.8414	29.7266	27.6842	30.5899	37.2326
AABR07058412.1	57.9177	-0.219803	0.251662	-0.873407	0.382441	0.999739	0.999739	64.7887	49.8622	51.1317	82.9974	62.4258	42.9583	62.6364	46.5407
AABR07058413.1	0.412711	1.07094	2.55604	0.418985	0.675227	0.999739	0.999739	0	0.890397	0	0	0	0.954629	1.45666	0
AABR07058464.1	24.8195	-0.176389	0.360755	-0.488945	0.624881	0.999739	0.999739	35.5007	27.6023	19.0661	23.5887	23.7813	21.0018	13.1099	34.9055
AABR07058479.1	1.86536	-0.113243	1.23677	-0.0915634	0.927045	0.999739	0.999739	0	3.56159	0.86664	3.49463	2.97266	2.86389	0	1.16352
AABR07058519.1	23.1954	0.343256	0.387409	0.88603	0.375601	0.999739	0.999739	16.8628	27.6023	20.7994	15.7258	22.7904	13.3648	39.3298	29.0879
AABR07058578.1	1.72877	-0.166002	1.32273	-0.1255	0.900128	0.999739	0.999739	1.77503	0.890397	2.59992	1.74731	0.990886	0	5.82664	0
AABR07058615.1	2.28537	0.360673	1.04168	0.346242	0.72916	0.999739	0.999739	3.55007	1.78079	0	2.62097	2.97266	0.954629	2.91332	3.49055
AABR07058706.1	0.478618	-0.961907	2.45301	-0.392133	0.69496	0.999739	0.999739	1.77503	0.890397	0	0	0	0	0	1.16352
AABR07058831.1	8.74288	-0.445796	0.512273	-0.870231	0.384174	0.999739	0.999739	13.3127	9.79437	10.3997	6.98926	8.91798	8.59166	7.2833	4.65407
AABR07058899.1	0.595586	1.91845	2.26838	0.845736	0.3977	0.999739	0.999739	0	0	0	0.873657	1.98177	1.90926	0	0
AABR07058914.1	3.31182	0.799555	0.85918	0.930603	0.352059	0.999739	0.999739	1.77503	1.78079	4.3332	1.74731	1.98177	3.81852	2.91332	8.14462
AABR07058934.1	2.35824	-0.589041	1.10636	-0.532415	0.594438	0.999739	0.999739	0.887516	4.45199	0.86664	5.24194	2.97266	0.954629	0	3.49055
AABR07059002.1	7.45904	0.00471326	0.678796	0.00694356	0.99446	0.999739	0.999739	4.43758	5.34238	15.5995	4.36829	5.94532	11.4555	10.1966	2.32704
AABR07059232.1	503.327	0.0332947	0.0911575	0.365244	0.714929	0.999739	0.999739	507.659	458.554	500.918	521.573	490.489	494.498	525.854	527.073
AABR07059632.3	13.9347	0.156979	0.42128	0.372625	0.709428	0.999739	0.999739	11.5377	13.356	14.7329	13.1049	7.92709	19.0926	13.1099	18.6163
AABR07059663.1	94.8165	0.207377	0.345094	0.600929	0.547888	0.999739	0.999739	84.3141	156.71	76.2643	34.9463	103.052	105.009	94.6829	103.553
AABR07059807.1	0.444118	-2.09962	2.92352	-0.718181	0.472645	0.999739	0.999739	2.66255	0.890397	0	0	0	0	0	0
AABR07059882.1	0.8035	-1.01496	2.18811	-0.463851	0.642754	0.999739	0.999739	1.77503	2.67119	0	0	1.98177	0	0	0
AABR07060145.1	3.33985	0.97719	1.186	0.82394	0.409974	0.999739	0.999739	6.21261	0.890397	0.86664	0.873657	0.990886	0	8.73996	8.14462
AABR07060293.1	0.933936	-0.45642	1.64577	-0.277329	0.781528	0.999739	0.999739	1.77503	0.890397	1.73328	0	0	1.90926	0	1.16352
AABR07060353.2	0.222239	-1.09825	3.53247	-0.310901	0.755876	0.999739	0.999739	0.887516	0.890397	0	0	0	0	0	0
AABR07060577.1	0.55815	1.70862	2.09343	0.816181	0.414397	0.999739	0.999739	0	0.890397	0	0	0	0.954629	1.45666	1.16352
AABR07060593.1	1.60156	2.6575	1.69636	1.56659	0.117211	0.999739	0.999739	0	0	0	1.74731	4.95443	0	1.45666	4.65407
AABR07060610.1	4.48646	-0.476744	0.775638	-0.614648	0.538787	0.999739	0.999739	5.3251	3.56159	6.06648	6.1156	0.990886	8.59166	2.91332	2.32704
AABR07060628.1	0.510559	-0.946897	2.1241	-0.445786	0.655752	0.999739	0.999739	0.887516	0	0.86664	0.873657	0	0	1.45666	0
AABR07060778.1	23.0161	0.366467	0.315724	1.16072	0.245757	0.999739	0.999739	21.3004	18.6983	17.3328	23.5887	26.7539	29.5935	18.9366	27.9244
AABR07060872.1	12.9644	-2.27522	0.637461	-3.56919	0.000358084	0.716346	0.716346	11.5377	25.8215	40.7321	7.86291	3.96354	4.77315	4.36998	4.65407
AABR07060915.1	0.473399	-0.944645	2.45731	-0.384422	0.700666	0.999739	0.999739	0	0.890397	1.73328	0	0	0	0	1.16352
AABR07061001.1	0.435929	-2.07622	2.93619	-0.707113	0.479496	0.999739	0.999739	0.887516	0	2.59992	0	0	0	0	0
AABR07061310.1	4.41268	-0.144448	0.678974	-0.212744	0.831526	0.999739	0.999739	5.3251	5.34238	4.3332	3.49463	3.96354	3.81852	4.36998	4.65407
AABR07061335.1	0.994102	-0.348583	1.55247	-0.224535	0.822341	0.999739	0.999739	0	0.890397	0.86664	2.62097	0	0.954629	1.45666	1.16352
AABR07061382.3	0.482305	0.352715	2.21563	0.159194	0.873516	0.999739	0.999739	0	0	0.86664	0.873657	0	0.954629	0	1.16352
AABR07061385.2	0.691687	3.05036	2.60473	1.17109	0.241564	0.999739	0.999739	0	0	0	0	0	0	4.36998	1.16352
AABR07061532.1	0.378508	1.08917	2.61148	0.417071	0.676626	0.999739	0.999739	0	0	0	0.873657	0.990886	0	0	1.16352
AABR07061614.3	43.3454	0.0529859	0.251649	0.210555	0.833235	0.999739	0.999739	39.0507	40.0679	50.2651	41.9355	48.5534	54.4139	30.5899	41.8866
AABR07061707.1	5.80852	0.360667	0.629002	0.573395	0.566377	0.999739	0.999739	5.3251	2.67119	5.19984	6.98926	3.96354	5.72777	7.2833	9.30814
AABR07061825.1	4.27851	0.843445	0.710193	1.18763	0.23498	0.999739	0.999739	2.66255	2.67119	3.46656	3.49463	7.92709	3.81852	4.36998	5.81759
AABR07061825.2	131.756	-0.0675495	0.165617	-0.407866	0.683372	0.999739	0.999739	138.453	135.34	145.595	121.438	159.533	129.83	112.163	111.698
AABR07061869.1	0.363854	-0.364799	3.13913	-0.11621	0.907486	0.999739	0.999739	0	0	0	1.74731	0	0	0	1.16352
AABR07061902.1	1.75732	1.13878	1.3409	0.849264	0.395734	0.999739	0.999739	2.66255	0.890397	0	0.873657	0.990886	5.72777	2.91332	0
AABR07061964.1	0.222239	-1.09825	3.53247	-0.310901	0.755876	0.999739	0.999739	0.887516	0.890397	0	0	0	0	0	0
AABR07062138.2	0.978219	1.00989	1.81526	0.556335	0.577982	0.999739	0.999739	0.887516	0	0	1.74731	0	2.86389	0	2.32704
AABR07062154.1	10.6697	0.538621	0.528638	1.01888	0.308258	0.999739	0.999739	11.5377	6.23278	11.2663	5.24194	8.91798	9.54629	23.3066	9.30814
AABR07062466.1	0.25377	0.355472	3.46111	0.102705	0.918198	0.999739	0.999739	0	0	0.86664	0	0	0	0	1.16352
AABR07062570.1	1012.16	-0.00626521	0.12764	-0.0490851	0.960851	0.999739	0.999739	949.643	965.19	903.038	1238.85	869.998	1081.59	1054.62	1034.37
AABR07062753.1	1.17242	0.264418	1.43909	0.18374	0.854217	0.999739	0.999739	0.887516	0	2.59992	0.873657	0.990886	2.86389	0	1.16352
AABR07062833.1	0.220507	-1.08965	3.5329	-0.308428	0.757757	0.999739	0.999739	0	0.890397	0	0.873657	0	0	0	0
AABR07063082.1	11.631	0.901699	0.845154	1.06691	0.286015	0.999739	0.999739	7.10013	5.34238	18.1994	1.74731	8.91798	2.86389	5.82664	43.0502
AABR07063279.1	2460.36	-0.0146087	0.0757817	-0.192773	0.847137	0.999739	0.999739	2491.26	2356.88	2661.45	2384.21	2506.94	2511.63	2278.22	2492.25
AABR07063281.1	842.442	-0.0182272	0.0792622	-0.229961	0.818122	0.999739	0.999739	809.415	859.233	833.707	890.257	826.399	886.85	809.903	823.77
AABR07063632.1	1.86875	0.158524	1.12345	0.141104	0.887788	0.999739	0.999739	0	2.67119	2.59992	1.74731	0.990886	2.86389	2.91332	1.16352
AABR07063703.1	0.338958	-0.363807	2.69932	-0.134778	0.892788	0.999739	0.999739	0	0.890397	0.86664	0	0	0.954629	0	0
AABR07064000.1	6.47252	0.353342	0.698896	0.505571	0.613158	0.999739	0.999739	5.3251	8.90397	1.73328	6.98926	6.9362	7.63703	1.45666	12.7987
AABR07064305.1	3.60465	2.87414	1.06139	2.7079	0.00677113	0.999739	0.999739	0.887516	0	2.59992	0	4.95443	10.5009	2.91332	6.98111
AABR07064502.1	0.45479	-0.954507	2.4855	-0.38403	0.700956	0.999739	0.999739	0	1.78079	0.86664	0	0.990886	0	0	0
AABR07064702.1	0.228536	0.355471	3.53381	0.100591	0.919875	0.999739	0.999739	0	0	0	0.873657	0	0.954629	0	0
AABR07064716.1	0.232191	0.355471	3.53381	0.100591	0.919875	0.999739	0.999739	0	0	0.86664	0	0.990886	0	0	0
AABR07064719.2	459.941	0.097905	0.158633	0.617178	0.537117	0.999739	0.999739	432.22	552.937	428.12	362.568	485.534	380.897	546.247	491.004
AABR07064753.1	0.577435	-0.266218	2.37996	-0.111858	0.910936	0.999739	0.999739	0	0.890397	0	1.74731	1.98177	0	0	0
AABR07064804.1	2290.63	0.015248	0.1018	0.149783	0.880935	0.999739	0.999739	2113.18	2186.82	2124.13	2690.86	2312.73	2444.8	2259.28	2193.23
AABR07064810.1	1.81609	-2.45661	1.37688	-1.78419	0.0743933	0.999739	0.999739	5.3251	3.56159	0.86664	2.62097	0.990886	0	0	1.16352
AABR07064867.2	0.809905	-0.964946	1.77071	-0.544949	0.585789	0.999739	0.999739	0.887516	0	2.59992	0.873657	0	0.954629	0	1.16352
AABR07064980.1	160.055	-0.0972797	0.215081	-0.452293	0.651058	0.999739	0.999739	234.304	152.258	161.195	113.575	158.542	147.013	176.256	137.295
AABR07065010.1	1.84807	-0.853814	1.15941	-0.736422	0.461474	0.999739	0.999739	0.887516	4.45199	1.73328	2.62097	2.97266	0.954629	0	1.16352
AABR07065031.1	9.47773	-0.121234	0.537494	-0.225553	0.821549	0.999739	0.999739	6.21261	15.1367	12.9996	5.24194	6.9362	12.4102	8.73996	8.14462
AABR07065113.1	2.37441	-0.393854	0.964558	-0.408326	0.683034	0.999739	0.999739	2.66255	2.67119	1.73328	3.49463	0.990886	1.90926	4.36998	1.16352
AABR07065139.1	0.444318	-0.933033	2.98735	-0.312328	0.754792	0.999739	0.999739	0	0	2.59992	0	0	0.954629	0	0
AABR07065139.2	2.66801	-0.883777	1.10649	-0.798719	0.424454	0.999739	0.999739	1.77503	1.78079	9.53304	0.873657	1.98177	1.90926	0	3.49055
AABR07065362.1	0.437684	-2.08171	2.43615	-0.854505	0.392825	0.999739	0.999739	0.887516	0	0.86664	1.74731	0	0	0	0
AABR07065438.2	9.36658	-0.656812	0.511045	-1.28523	0.19871	0.999739	0.999739	15.9753	7.12318	10.3997	12.2312	8.91798	5.72777	8.73996	5.81759
AABR07065531.24	1.21299	0.282738	1.56677	0.18046	0.856792	0.999739	0.999739	3.55007	0.890397	0	0	1.98177	0.954629	0	2.32704
AABR07065531.6	0.368039	-0.375916	3.13019	-0.120094	0.904409	0.999739	0.999739	0	1.78079	0	0	0	0	0	1.16352
AABR07065590.1	3.7462	0.524614	0.777805	0.67448	0.500006	0.999739	0.999739	2.66255	2.67119	1.73328	5.24194	6.9362	2.86389	4.36998	3.49055
AABR07065593.1	20.3181	0.200763	0.358473	0.560049	0.575446	0.999739	0.999739	12.4252	17.8079	19.9327	25.3361	15.8542	25.775	23.3066	22.1068
AABR07065776.1	0.21963	-1.08482	3.53315	-0.307039	0.758813	0.999739	0.999739	0	0.890397	0.86664	0	0	0	0	0
AABR07065781.1	0.32796	-1.66516	3.1862	-0.522617	0.601241	0.999739	0.999739	0	0.890397	1.73328	0	0	0	0	0
AABR07066379.1	705.393	0.41562	0.162952	2.55058	0.0107545	0.999739	0.999739	599.961	534.238	714.978	568.751	661.912	800.934	703.567	1058.8
AABR07066529.1	53.4516	0.0524491	0.226596	0.231465	0.816953	0.999739	0.999739	55.9135	51.643	57.1982	45.4302	42.6081	66.824	50.9831	57.0124
AABR07066700.1	464.425	-0.131724	0.196454	-0.670511	0.502532	0.999739	0.999739	508.547	544.033	562.449	328.495	582.641	420.991	394.755	373.489
AABR07066800.1	24.4433	0.323553	0.350834	0.92224	0.356404	0.999739	0.999739	18.6378	25.8215	17.3328	24.4624	15.8542	23.8657	33.5032	36.069
AABR07066818.1	5.21327	0.110939	0.693087	0.160065	0.87283	0.999739	0.999739	5.3251	4.45199	8.6664	1.74731	7.92709	5.72777	4.36998	3.49055
AABR07066994.1	0.362977	-0.361859	2.64981	-0.13656	0.891378	0.999739	0.999739	0	0	0.86664	0.873657	0	0	0	1.16352
AABR07067042.3	0.222599	-1.09825	3.53247	-0.310901	0.755876	0.999739	0.999739	0	1.78079	0	0	0	0	0	0
AABR07067267.1	221.848	0.0979783	0.141847	0.690733	0.489733	0.999739	0.999739	180.166	243.078	193.261	241.129	227.904	228.156	215.586	245.502
AABR07067339.1	0.29129	0.355473	3.30648	0.107508	0.914386	0.999739	0.999739	0	0	0	0.873657	0	0	1.45666	0
AABR07067388.1	0.3461	-0.374411	2.68617	-0.139385	0.889146	0.999739	0.999739	0.887516	0.890397	0	0	0.990886	0	0	0
AABR07067600.1	10.8978	-0.460982	0.464815	-0.991755	0.321317	0.999739	0.999739	11.5377	11.5752	12.9996	14.8522	7.92709	14.3194	5.82664	8.14462
AABR07067749.1	5.92941	0.223723	0.731397	0.305884	0.759693	0.999739	0.999739	5.3251	0.890397	12.133	3.49463	7.92709	5.72777	7.2833	4.65407
AABR07067762.1	5.00254	-0.293677	0.735143	-0.399483	0.689538	0.999739	0.999739	2.66255	8.01357	4.3332	6.98926	1.98177	3.81852	2.91332	9.30814
AABR07067814.1	1.50001	-2.10074	1.58313	-1.32696	0.184523	0.999739	0.999739	1.77503	0	6.06648	1.74731	0	0.954629	1.45666	0
AABR07068042.1	0.2348	0.355471	3.53381	0.100591	0.919875	0.999739	0.999739	0.887516	0	0	0	0.990886	0	0	0
AABR07068084.1	0.469961	0.309787	2.52561	0.122658	0.902378	0.999739	0.999739	0.887516	0.890397	0	0	1.98177	0	0	0
AABR07068154.1	8.84595	-0.352082	0.523138	-0.673018	0.500936	0.999739	0.999739	8.87516	16.0271	7.79976	6.98926	7.92709	8.59166	8.73996	5.81759
AABR07068253.1	5.73647	0.249706	0.856394	0.291578	0.770609	0.999739	0.999739	4.43758	9.79437	3.46656	3.49463	1.98177	17.1833	4.36998	1.16352
AABR07068536.1	3.85942	-0.520145	0.928853	-0.559986	0.575489	0.999739	0.999739	5.3251	2.67119	9.53304	0.873657	4.95443	2.86389	0	4.65407
AABR07068587.1	12.5066	0.473007	0.479009	0.987471	0.323412	0.999739	0.999739	7.98765	12.4656	6.93312	14.8522	23.7813	13.3648	10.1966	10.4717
AABR07068694.1	364.202	-0.229272	0.155375	-1.47561	0.14005	0.999739	0.999739	438.433	393.555	453.253	286.56	336.901	304.527	340.858	359.527
AABR07068728.1	20.011	0.248761	0.338215	0.735511	0.462029	0.999739	0.999739	20.4129	17.8079	15.5995	19.2205	22.7904	22.9111	26.2199	15.1257
AABR07068799.1	0.680873	-0.680369	1.82797	-0.372198	0.709745	0.999739	0.999739	0.887516	0	0.86664	1.74731	0.990886	0.954629	0	0
AABR07069454.1	113.001	-0.366078	0.163988	-2.23234	0.0255924	0.999739	0.999739	141.115	129.998	105.73	132.796	96.116	101.191	88.8562	108.207
AABR07069466.1	352.235	-0.052367	0.118673	-0.441271	0.659017	0.999739	0.999739	331.044	349.036	350.122	405.377	382.482	323.619	313.182	363.017
AABR07069490.1	0.23516	0.355471	3.53381	0.100591	0.919875	0.999739	0.999739	0	0.890397	0	0	0.990886	0	0	0
AABR07069821.1	3.65682	-0.0594304	0.829833	-0.0716173	0.942906	0.999739	0.999739	0.887516	6.23278	4.3332	3.49463	4.95443	3.81852	4.36998	1.16352
AABR07069837.1	0.484398	0.350921	2.21346	0.158539	0.874032	0.999739	0.999739	0	0.890397	0.86664	0	0	0.954629	0	1.16352
AABR07070043.1	21.4636	0.0660073	0.381904	0.172838	0.862779	0.999739	0.999739	13.3127	21.3695	28.5991	20.0941	17.836	14.3194	24.7632	31.415
AABR07070225.1	1.7453	-1.65605	1.35958	-1.21806	0.223201	0.999739	0.999739	1.77503	4.45199	4.3332	0	0.990886	0.954629	1.45666	0
AABR07070238.1	2.14783	-0.0258325	1.0345	-0.0249709	0.980078	0.999739	0.999739	1.77503	3.56159	2.59992	0.873657	2.97266	1.90926	0	3.49055
AABR07070307.1	63.8433	0.00470615	0.377143	0.0124784	0.990044	0.999739	0.999739	39.9382	51.643	50.2651	112.702	34.681	58.2324	65.5497	97.7355
AABR07070518.1	38.1409	0.0723703	0.273981	0.264144	0.791669	0.999739	0.999739	45.2633	32.9447	32.9323	38.4409	49.5443	44.8676	32.0465	29.0879
AABR07071000.1	16.9532	0.655403	0.363158	1.80473	0.0711163	0.999739	0.999739	14.2003	12.4656	14.7329	11.3575	17.836	21.9565	17.4799	25.5974
AABR07071101.1	1.66582	-0.518509	1.28566	-0.403302	0.686726	0.999739	0.999739	2.66255	0	1.73328	3.49463	0.990886	0.954629	0	3.49055
AABR07071195.1	0.729418	-0.56318	2.23432	-0.252059	0.800995	0.999739	0.999739	1.77503	0	1.73328	0	0	0	0	2.32704
AABR07071198.1	6.3897	-1.09659	0.651086	-1.68425	0.092134	0.999739	0.999739	13.3127	6.23278	7.79976	6.98926	1.98177	2.86389	7.2833	4.65407
AABR07071244.1	2949.86	-0.0745741	0.0696272	-1.07105	0.284148	0.999739	0.999739	2985.61	2941.87	3067.9	3111.09	3008.33	2983.22	2831.75	2669.11
AABR07071287.1	22.9229	-1.12121	0.413442	-2.7119	0.00668997	0.999739	0.999739	35.5007	29.3831	45.9319	14.8522	13.8724	12.4102	11.6533	19.7798
AABR07071294.1	0.658608	-0.156093	2.06164	-0.0757132	0.939647	0.999739	0.999739	1.77503	0	0	0.873657	0	0	1.45666	1.16352
AABR07071482.1	0.233068	0.355471	3.53381	0.100591	0.919875	0.999739	0.999739	0	0	0	0.873657	0.990886	0	0	0
AABR07071482.2	2.88485	-1.1977	1.01063	-1.18511	0.235974	0.999739	0.999739	1.77503	6.23278	1.73328	6.1156	1.98177	0	2.91332	2.32704
AABR07071500.1	0.347864	1.00519	3.17632	0.316464	0.751651	0.999739	0.999739	0	0	0	0.873657	0	1.90926	0	0
AABR07071622.1	0.410618	1.07095	2.5595	0.418421	0.67564	0.999739	0.999739	0	0	0	0.873657	0	0.954629	1.45666	0
AABR07071746.1	0.344368	-0.367948	2.68835	-0.136867	0.891136	0.999739	0.999739	0	0.890397	0	0.873657	0.990886	0	0	0
AABR07071747.1	1.08152	-0.663333	1.60474	-0.413358	0.679344	0.999739	0.999739	2.66255	0.890397	1.73328	0	0	1.90926	1.45666	0
AABR07071765.1	67.2586	-0.000660174	0.223934	-0.00294808	0.997648	0.999785	0.999785	54.1385	84.5877	71.0644	60.2823	74.3165	69.6879	49.5264	74.4651
AABR07071779.1	0.582148	0.802112	2.09684	0.382534	0.702066	0.999739	0.999739	0	0.890397	0.86664	0	0.990886	1.90926	0	0
AABR07071848.1	0.790808	2.36311	1.91415	1.23455	0.216999	0.999739	0.999739	0	0.890397	0	0	0.990886	0.954629	0	3.49055
AABR07071864.1	0.52645	0.362694	2.1844	0.166038	0.868127	0.999739	0.999739	0	0.890397	0	0.873657	0.990886	0	1.45666	0
AABR07071891.2	16.5381	0.487247	0.395972	1.23051	0.218507	0.999739	0.999739	15.9753	12.4656	15.5995	11.3575	27.7448	20.0472	17.4799	11.6352
AABR07071891.3	3.45554	-0.810105	0.882614	-0.917847	0.358699	0.999739	0.999739	6.21261	2.67119	1.73328	6.98926	2.97266	0.954629	1.45666	4.65407
AABR07071935.1	1.59626	1.38453	1.47965	0.935716	0.349419	0.999739	0.999739	0	1.78079	1.73328	0	1.98177	0	1.45666	5.81759
AABR07071986.1	106.645	-0.10688	0.217425	-0.491572	0.623022	0.999739	0.999739	124.252	111.3	135.196	72.5135	108.007	109.782	81.5729	110.534
AABR07072025.1	5.57657	0.494007	0.751089	0.657721	0.510717	0.999739	0.999739	4.43758	0.890397	4.3332	8.73657	8.91798	4.77315	10.1966	2.32704
AABR07072078.1	1.15581	-0.943434	1.5909	-0.593021	0.553167	0.999739	0.999739	3.55007	0.890397	1.73328	0	0	1.90926	0	1.16352
AABR07072078.2	0.438899	-2.08492	2.43491	-0.856259	0.391855	0.999739	0.999739	0.887516	0.890397	1.73328	0	0	0	0	0
AABR07072096.1	4.92159	-2.64474	0.931396	-2.83955	0.00451778	0.999739	0.999739	5.3251	3.56159	9.53304	15.7258	0.990886	1.90926	0	2.32704
AABR07072108.1	192.662	0.0146504	0.158623	0.0923601	0.926412	0.999739	0.999739	163.303	219.928	203.66	180.847	220.968	175.652	161.689	215.251
AABR07072207.1	6.88885	-0.441485	0.669119	-0.659801	0.509382	0.999739	0.999739	15.9753	2.67119	5.19984	7.86291	5.94532	6.6824	7.2833	3.49055
AABR07072261.1	1.38609	0.100732	1.25531	0.0802443	0.936043	0.999739	0.999739	0.887516	1.78079	1.73328	0.873657	0.990886	1.90926	2.91332	0
AABR07072272.1	0.39962	-0.361924	2.58255	-0.140142	0.888548	0.999739	0.999739	0	0	0.86664	0.873657	0	0	1.45666	0
AABR07072283.2	1.00639	-1.49508	1.64348	-0.909701	0.36298	0.999739	0.999739	0.887516	1.78079	2.59992	0.873657	0	1.90926	0	0
AABR07072356.1	233.077	0.039408	0.157826	0.249693	0.802824	0.999739	0.999739	257.38	219.038	266.925	177.352	260.603	247.249	212.672	223.395
AABR07072371.1	0.739045	0.332878	1.79252	0.185704	0.852677	0.999739	0.999739	0	0.890397	0.86664	0.873657	0	0.954629	0	2.32704
AABR07072400.1	6.42545	0.401852	0.589513	0.681669	0.495449	0.999739	0.999739	5.3251	8.90397	3.46656	4.36829	6.9362	6.6824	8.73996	6.98111
AABR07072440.1	0.471725	1.50173	2.4375	0.616095	0.537831	0.999739	0.999739	0	0	0	0.873657	0.990886	1.90926	0	0
AABR07072463.1	1.59933	-0.628987	1.43596	-0.438025	0.661368	0.999739	0.999739	4.43758	0.890397	0	2.62097	1.98177	2.86389	0	0
AABR07072539.3	0.2693	1.81376	3.3875	0.535426	0.592355	0.999739	0.999739	0	0	0	0	0.990886	0	0	1.16352
AABR07072539.4	2.71682	0.366048	1.09143	0.335382	0.737337	0.999739	0.999739	4.43758	0.890397	3.46656	0.873657	2.97266	7.63703	1.45666	0
AABR07072539.5	0.25377	0.355472	3.46111	0.102705	0.918198	0.999739	0.999739	0	0	0.86664	0	0	0	0	1.16352
AABR07072639.2	18.5931	0.243453	0.393923	0.618021	0.536562	0.999739	0.999739	11.5377	18.6983	12.9996	24.4624	12.8815	21.0018	26.2199	20.9433
AABR07072676.2	1.84024	-0.48097	1.25964	-0.381833	0.702586	0.999739	0.999739	0	1.78079	2.59992	4.36829	0.990886	3.81852	0	1.16352
AABR07072761.1	0.865925	-0.0700596	1.5916	-0.0440183	0.96489	0.999739	0.999739	0.887516	0.890397	0	1.74731	0.990886	0.954629	1.45666	0
AABR07072933.1	8.25188	-0.119951	0.611516	-0.196153	0.844491	0.999739	0.999739	7.10013	7.12318	12.133	7.86291	13.8724	1.90926	10.1966	5.81759
AABR07073038.3	2.71586	0.781063	1.00714	0.775529	0.438027	0.999739	0.999739	0.887516	3.56159	1.73328	1.74731	0	4.77315	4.36998	4.65407
AABR07073146.1	0.373975	1.071	2.61691	0.409261	0.682348	0.999739	0.999739	0	0	0	0.873657	0	0.954629	0	1.16352
AABR07073181.1	93.428	-0.135323	0.197002	-0.68691	0.492139	0.999739	0.999739	106.502	81.0261	95.3304	108.333	68.3711	108.828	91.7696	87.2638
AABR07073186.2	1.35189	0.0762148	1.20479	0.0632601	0.949559	0.999739	0.999739	0.887516	0.890397	1.73328	1.74731	1.98177	0.954629	1.45666	1.16352
AABR07073270.1	2.55515	-0.0950542	1.02094	-0.0931045	0.925821	0.999739	0.999739	1.77503	5.34238	0	3.49463	2.97266	1.90926	1.45666	3.49055
Aacs	949.689	-0.0237712	0.103954	-0.22867	0.819126	0.999739	0.999739	968.28	944.711	965.437	954.907	1044.39	1038.64	849.233	831.915
Aadat	229.75	0.0813518	0.225376	0.360961	0.718129	0.999739	0.999739	213.891	289.379	194.127	197.446	334.92	244.385	160.233	203.616
Aagab	1790.22	-0.0516709	0.0801467	-0.644704	0.519119	0.999739	0.999739	1816.75	1805.73	1908.34	1761.29	1931.24	1753.65	1628.55	1716.19
Aak1	7448.09	0.0881035	0.162347	0.542686	0.587346	0.999739	0.999739	6330.65	6702.91	6043.08	9805.93	6475.44	8624.12	8116.51	7486.07
Aamdc	117.537	-0.331946	0.186956	-1.77553	0.07581	0.999739	0.999739	139.34	146.025	138.662	99.5969	117.915	83.0527	106.336	109.371
Aamp	3263.61	-0.052463	0.0977056	-0.53695	0.591302	0.999739	0.999739	3433.8	3039.82	3593.09	3226.42	3673.22	3035.72	3079.38	3027.47
Aanat	4.30054	-0.232577	0.81319	-0.286006	0.774874	0.999739	0.999739	1.77503	9.79437	5.19984	1.74731	4.95443	1.90926	4.36998	4.65407
Aar2	1054.63	-0.0973911	0.0764656	-1.27366	0.202784	0.999739	0.999739	1125.37	1099.64	1019.17	1118.28	1006.74	1072.05	990.529	1005.28
Aard	73.554	-0.37256	0.264194	-1.41018	0.158488	0.999739	0.999739	74.5514	106.848	102.263	48.9248	72.3347	69.6879	56.8097	57.0124
Aars1	4296.15	-0.0681034	0.0733122	-0.928952	0.352914	0.999739	0.999739	4492.61	4060.21	4450.19	4589.32	4283.6	4420.89	4075.73	3996.68
Aars2	286.845	0.0783234	0.117756	0.665133	0.505965	0.999739	0.999739	301.756	274.242	242.659	297.043	305.193	273.024	302.985	297.861
Aarsd1	1486.37	-0.0812828	0.106641	-0.762212	0.445934	0.999739	0.999739	1445.76	1526.14	1734.15	1408.34	1654.78	1394.71	1369.26	1357.83
Aasdh	309	-0.0474781	0.147381	-0.322145	0.747343	0.999739	0.999739	305.306	281.365	282.525	387.03	274.475	299.754	285.505	356.036
Aasdhppt	613.594	0.0127044	0.0856333	0.148358	0.88206	0.999739	0.999739	581.323	619.716	616.181	627.286	612.368	657.739	614.71	579.432
Aass	184.463	-0.0672001	0.165116	-0.406988	0.684017	0.999739	0.999739	172.178	220.818	200.194	160.753	149.624	195.699	211.216	165.22
Aatf	244.098	-0.106298	0.127681	-0.832526	0.405112	0.999739	0.999739	237.854	243.969	274.725	256.855	260.603	248.204	231.609	198.962
Aatk	3625.89	0.168339	0.0808186	2.08293	0.0372578	0.999739	0.999739	3562.49	3644.39	3332.23	3118.96	3702.94	3753.6	3771.29	4121.18
AB124611	5.22381	0.837817	0.663835	1.26209	0.206918	0.999739	0.999739	5.3251	2.67119	4.3332	2.62097	7.92709	6.6824	8.73996	3.49055
Abat	1548.1	0.134093	0.169029	0.793309	0.427598	0.999739	0.999739	1388.08	1465.59	1162.16	1887.97	1224.74	1766.06	1819.37	1670.81
Abca1	294.704	0.156933	0.26354	0.595481	0.551522	0.999739	0.999739	244.955	263.558	192.394	413.24	179.35	363.714	364.165	336.257
Abca12	9.27826	0.143389	0.527851	0.271647	0.785894	0.999739	0.999739	14.2003	7.12318	6.93312	6.98926	13.8724	7.63703	11.6533	5.81759
Abca13	19.1467	-0.11213	0.371887	-0.301518	0.76302	0.999739	0.999739	12.4252	24.9311	24.2659	17.4731	17.836	14.3194	23.3066	18.6163
Abca14	1.24163	0.328746	1.30734	0.251462	0.801457	0.999739	0.999739	1.77503	0.890397	0	1.74731	0.990886	1.90926	1.45666	1.16352
Abca16	0.619249	-1.35984	2.01247	-0.675708	0.499226	0.999739	0.999739	0	0.890397	1.73328	0.873657	0	0	1.45666	0
Abca17	18.291	-0.458363	0.508686	-0.901073	0.36755	0.999739	0.999739	13.3127	20.4791	10.3997	41.0619	18.8268	21.0018	7.2833	13.9622
Abca2	6275.83	0.0713824	0.109935	0.649317	0.516134	0.999739	0.999739	6686.55	6341.41	5471.1	5982.8	5365.65	6885.74	6486.51	6986.92
Abca3	2361.12	-0.0447251	0.121979	-0.366661	0.713872	0.999739	0.999739	2374.11	2231.33	2039.2	2946.85	2204.72	2485.85	2228.69	2378.23
Abca4	9.99862	-0.361135	0.498072	-0.725066	0.468412	0.999739	0.999739	7.10013	9.79437	17.3328	10.4839	7.92709	6.6824	10.1966	10.4717
Abca6	10.7032	0.0552649	0.570297	0.0969055	0.922801	0.999739	0.999739	5.3251	11.5752	15.5995	9.61023	3.96354	20.0472	10.1966	9.30814
Abca7	597.777	0.0584788	0.141906	0.412095	0.68027	0.999739	0.999739	600.849	527.115	512.184	701.547	546.969	553.685	610.34	729.526
Abca8	264.565	-0.0607557	0.144269	-0.421127	0.673662	0.999739	0.999739	243.179	255.544	242.659	338.979	237.813	268.251	257.829	272.263
Abca8a	1552.54	-0.00414276	0.111295	-0.0372233	0.970307	0.999739	0.999739	1598.42	1793.26	1336.36	1490.46	1438.77	1505.45	1548.43	1709.21
Abca9	36.6398	0.233651	0.297227	0.786102	0.431808	0.999739	0.999739	39.9382	26.7119	24.2659	43.6829	28.7357	43.9129	39.3298	46.5407
Abcb10	544.417	0.110682	0.106065	1.04353	0.296701	0.999739	0.999739	498.784	540.471	468.852	585.35	516.252	579.46	579.751	586.413
Abcb11	2.16892	0.202468	0.980032	0.206594	0.836327	0.999739	0.999739	1.77503	2.67119	1.73328	1.74731	1.98177	1.90926	4.36998	1.16352
Abcb4	179.243	-0.0770518	0.151389	-0.508964	0.610777	0.999739	0.999739	152.653	194.107	175.928	212.299	153.587	168.969	187.909	188.49
Abcb5	0.233068	0.355471	3.53381	0.100591	0.919875	0.999739	0.999739	0	0	0	0.873657	0.990886	0	0	0
Abcb6	940.56	-0.119119	0.097105	-1.22671	0.219933	0.999739	0.999739	1038.39	952.725	870.106	1054.5	887.834	833.391	943.915	943.613
Abcb7	205.367	0.601043	0.217817	2.7594	0.00579072	0.999739	0.999739	146.44	182.531	107.463	215.793	192.232	269.205	288.419	240.848
Abcb8	1033.76	0.0238859	0.0796082	0.300043	0.764145	0.999739	0.999739	1038.39	966.971	1092.83	1002.08	1079.08	1028.14	1073.56	988.99
Abcb9	842.755	-0.0211282	0.109763	-0.192488	0.84736	0.999739	0.999739	933.667	767.522	926.438	769.692	916.57	824.799	763.29	840.06
Abcc1	277.075	0.0533522	0.317908	0.167823	0.866723	0.999739	0.999739	196.141	252.873	151.662	486.627	183.314	282.57	319.008	344.401
Abcc10	213.993	0.105426	0.150148	0.702146	0.482588	0.999739	0.999739	240.517	214.586	181.128	186.963	214.031	187.107	249.089	238.521
Abcc12	3.23432	-1.28371	0.975405	-1.31608	0.188146	0.999739	0.999739	5.3251	5.34238	6.06648	1.74731	0	4.77315	1.45666	1.16352
Abcc2	56.7957	0.00652031	0.233808	0.0278875	0.977752	0.999739	0.999739	56.801	52.5334	43.332	74.2608	50.5352	63.9601	52.4397	60.5029
Abcc3	32.4808	-0.144978	0.26627	-0.544478	0.586112	0.999739	0.999739	40.8258	30.2735	31.199	34.0726	31.7084	31.5028	33.5032	26.7609
Abcc4	140.757	0.153613	0.214338	0.716686	0.473568	0.999739	0.999739	148.215	111.3	98.7969	173.858	118.906	135.557	166.059	173.364
Abcc5	2135.19	-0.0101531	0.133245	-0.0761986	0.939261	0.999739	0.999739	2121.16	1993.6	1774.01	2681.25	1912.41	2116.41	2183.53	2299.11
Abcc6	48.4874	-0.201823	0.240565	-0.838953	0.401495	0.999739	0.999739	58.5761	42.7391	51.1317	54.1667	32.6992	45.8222	53.8964	48.8677
Abcc8	566.61	0.0191738	0.127463	0.150426	0.880428	0.999739	0.999739	639.012	513.759	483.585	614.181	518.233	544.139	575.381	644.589
Abcc9	131.004	0.0821361	0.262503	0.312896	0.75436	0.999739	0.999739	116.265	119.313	98.7969	173.858	75.3073	155.605	170.429	138.459
Abcd1	270.29	0.0832609	0.118622	0.701901	0.482741	0.999739	0.999739	256.492	241.298	257.392	294.422	263.576	296.89	292.789	259.464
Abcd2	724.184	0.0172671	0.0940224	0.183648	0.854289	0.999739	0.999739	644.337	763.961	719.311	752.219	749.11	753.202	739.983	671.35
Abcd3	2130.17	-0.0107615	0.0627005	-0.171633	0.863726	0.999739	0.999739	2170.87	2187.71	2035.74	2157.93	2127.43	2077.27	2112.16	2172.29
Abcd4	170.237	-0.134747	0.142707	-0.944221	0.345057	0.999739	0.999739	187.266	164.723	186.328	172.984	169.442	132.693	176.256	172.201
Abce1	1820.92	0.0291187	0.090358	0.322259	0.747257	0.999739	0.999739	1676.52	1959.76	1789.61	1783.13	1730.09	1949.35	1976.69	1702.23
Abcf1	2129.29	-0.0766384	0.0857448	-0.893796	0.371431	0.999739	0.999739	2378.54	2131.61	2264.53	1968.35	2179.95	1983.72	2107.79	2019.87
Abcf2	1999.59	-0.0186509	0.0739426	-0.252235	0.800859	0.999739	0.999739	2146.9	1881.41	2025.34	1998.05	2084.82	1998.99	1934.44	1926.79
Abcf3	1484.22	-0.0544074	0.0800801	-0.679412	0.496877	0.999739	0.999739	1467.06	1479.84	1593.75	1509.68	1587.4	1450.08	1430.44	1355.5
Abcg1	1415.79	0.0386862	0.10456	0.36999	0.71139	0.999739	0.999739	1404.94	1296.42	1255.76	1630.24	1346.61	1489.22	1405.68	1497.45
Abcg2	172.106	0.0842952	0.51356	0.164139	0.869622	0.999739	0.999739	150.878	170.956	80.5975	266.465	254.658	210.018	64.093	179.182
Abcg3l1	51.8139	0.203879	0.265823	0.766971	0.443099	0.999739	0.999739	52.3635	33.8351	53.7317	53.2931	77.2891	46.7768	43.6998	53.5218
Abcg3l2	20.9136	-0.0475144	0.386714	-0.122867	0.902213	0.999739	0.999739	19.5254	16.9175	19.0661	29.7043	29.7266	20.0472	21.8499	10.4717
Abcg3l3	22.9	0.234361	0.384171	0.610044	0.541833	0.999739	0.999739	12.4252	20.4791	15.5995	35.8199	22.7904	28.6389	21.8499	25.5974
Abcg3l4	29.5433	-0.0635231	0.284774	-0.223065	0.823485	0.999739	0.999739	29.288	24.9311	38.1321	27.957	25.763	27.6842	33.5032	29.0879
Abcg4	1230.34	0.00408303	0.0792968	0.0514905	0.958935	0.999739	0.999739	1199.03	1196.69	1217.63	1298.25	1140.51	1230.52	1319.73	1240.31
Abcg5	12.4866	0.0939372	0.493171	0.190476	0.848936	0.999739	0.999739	10.6502	5.34238	21.666	10.4839	11.8906	13.3648	16.0233	10.4717
Abcg8	0.365069	-0.36384	2.64557	-0.137528	0.890613	0.999739	0.999739	0	0.890397	0.86664	0	0	0	0	1.16352
Abhd1	372.756	-0.0813088	0.119015	-0.683179	0.494494	0.999739	0.999739	433.996	347.255	415.12	336.358	357.71	355.122	364.165	372.326
Abhd10	238.203	0.105781	0.122892	0.860769	0.389365	0.999739	0.999739	202.354	250.202	242.659	223.656	251.685	250.113	224.326	260.628
Abhd11	289.83	-0.0598632	0.117859	-0.50792	0.61151	0.999739	0.999739	307.081	252.873	319.79	304.033	302.22	277.797	276.765	278.081
Abhd12	4428.96	-0.0248291	0.0878808	-0.282532	0.777536	0.999739	0.999739	4649.7	4204.45	4928.58	4086.97	4707.7	4316.83	4189.35	4348.07
Abhd12b	0.230628	0.355471	3.53381	0.100591	0.919875	0.999739	0.999739	0	0.890397	0	0	0	0.954629	0	0
Abhd13	905.683	0.0763774	0.0858304	0.889864	0.373539	0.999739	0.999739	799.652	950.944	864.906	912.098	916.57	960.357	908.956	931.978
Abhd14a	271.388	-0.391626	0.210251	-1.86266	0.0625098	0.999739	0.999739	205.904	289.379	415.12	320.632	256.64	183.289	265.112	235.031
Abhd14b	397.821	0.0088677	0.122555	0.072357	0.942318	0.999739	0.999739	399.382	397.117	449.786	338.979	415.181	378.033	439.911	364.181
Abhd15	22.2252	0.289416	0.405847	0.713117	0.475774	0.999739	0.999739	24.8505	22.2599	14.7329	17.4731	10.8997	20.0472	34.9598	32.5785
Abhd16a	1488.6	0.0201834	0.0973389	0.207352	0.835735	0.999739	0.999739	1608.18	1368.54	1577.28	1358.54	1630.01	1380.39	1510.56	1475.34
Abhd16b	924.56	-0.0309083	0.0810306	-0.381439	0.702877	0.999739	0.999739	933.667	900.191	1014.83	890.257	935.397	936.491	894.389	891.255
Abhd17a	1871.77	0.0617225	0.128754	0.479385	0.631665	0.999739	0.999739	1995.14	1814.63	2086	1431.05	2083.83	1725.01	1908.22	1930.28
Abhd17b	631.035	-0.0142458	0.118309	-0.120412	0.904157	0.999739	0.999739	518.31	703.414	616.181	698.926	661.912	610.008	620.537	618.991
Abhd17c	850.58	-0.0415759	0.0780379	-0.532765	0.594196	0.999739	0.999739	868.879	823.617	883.972	874.531	832.344	807.616	820.099	893.582
Abhd18	124.463	0.13563	0.183723	0.73823	0.460375	0.999739	0.999739	96.7393	121.984	103.13	152.89	119.897	139.376	120.903	140.786
Abhd2	635.331	0.1609	0.22719	0.708217	0.47881	0.999739	0.999739	507.659	602.799	418.587	870.162	458.78	752.248	737.07	735.343
Abhd3	3137.21	0.00881714	0.0828639	0.106405	0.915261	0.999739	0.999739	3269.61	3237.48	3253.37	2748.53	3058.87	3087.27	3278.94	3163.6
Abhd4	2032.95	0.0192119	0.0912545	0.210531	0.833253	0.999739	0.999739	2134.48	2032.78	2128.47	1784.01	2211.66	2030.5	1900.94	2040.81
Abhd5	487.954	-0.0150347	0.094113	-0.159752	0.873077	0.999739	0.999739	486.359	517.321	502.651	457.796	495.443	511.681	447.194	485.187
Abhd6	1505.35	-0.0614473	0.069179	-0.888237	0.374413	0.999739	0.999739	1542.5	1466.48	1566.88	1574.33	1450.66	1470.13	1423.16	1548.64
Abhd8	4937.39	0.195233	0.14691	1.32893	0.183871	0.999739	0.999739	5483.08	4563.28	5010.91	3358.34	5471.67	4890.56	4906.03	5815.26
Abi1	3794.52	-0.0676092	0.0963269	-0.701872	0.482759	0.999739	0.999739	3480.84	3907.95	3780.28	4362.17	3475.04	3482.49	3935.89	3931.53
Abi2	8281.47	0.057555	0.0938665	0.613157	0.539772	0.999739	0.999739	7267.87	8254.87	7565.76	9376.96	8530.54	8540.11	8415.12	8300.53
Abi3	91.211	0.150408	0.201051	0.748107	0.454396	0.999739	0.999739	101.177	83.6973	98.7969	62.0296	107.016	86.8712	100.51	89.5909
Abi3bp	16.5436	0.863394	0.499911	1.7271	0.0841504	0.999739	0.999739	7.10013	11.5752	11.2663	16.5995	10.8997	11.4555	26.2199	37.2326
Abitram	143.255	0.103722	0.226199	0.458546	0.646561	0.999739	0.999739	118.04	141.573	100.53	191.331	110.979	150.831	179.169	153.584
Abl1	1209.63	0.134045	0.0914489	1.46579	0.142706	0.999739	0.999739	1137.8	1211.83	1048.63	1214.38	1141.5	1278.25	1300.8	1343.86
Abl2	350.971	0.219334	0.426393	0.514395	0.606976	0.999739	0.999739	230.754	339.241	191.527	535.552	192.232	414.309	439.911	464.244
Ablim2	1444.35	0.0425754	0.0762187	0.558595	0.576438	0.999739	0.999739	1387.19	1381.9	1423.89	1496.57	1397.15	1473.95	1580.48	1413.67
Ablim3	395.769	-0.00862146	0.169482	-0.0508694	0.95943	0.999739	0.999739	375.419	401.569	361.389	447.312	338.883	297.844	451.564	492.168
Abo	90.4756	-0.166859	0.168296	-0.991464	0.321459	0.999739	0.999739	95.8518	94.3821	103.13	88.2394	79.2709	79.2342	97.5962	86.1003
Abr	11784	0.00852585	0.105241	0.0810125	0.935432	0.999739	0.999739	11670.8	11722.1	10140.6	13461.3	10668.9	11616.9	12680.2	12311.2
Abra	7.35313	0.317484	0.580024	0.547364	0.584129	0.999739	0.999739	5.3251	6.23278	9.53304	5.24194	13.8724	6.6824	7.2833	4.65407
Abracl	507.211	-0.167477	0.107259	-1.56142	0.118425	0.999739	0.999739	522.747	515.54	562.449	547.783	553.905	473.496	444.281	437.483
Abraxas1	41.4213	-0.124977	0.289442	-0.431785	0.665898	0.999739	0.999739	47.0384	34.7255	57.1982	34.9463	46.5717	47.7315	24.7632	38.3961
Abraxas2	629.969	-0.00700465	0.0847473	-0.0826533	0.934127	0.999739	0.999739	617.711	625.949	651.713	632.528	665.876	650.102	605.97	589.903
Abt1	472.14	-0.0874014	0.129435	-0.675251	0.499517	0.999739	0.999739	499.672	471.02	533.85	443.818	539.042	486.861	393.298	409.558
Abtb1	436.109	-0.0717672	0.105922	-0.677545	0.498061	0.999739	0.999739	461.509	449.65	466.252	410.619	452.835	383.761	403.495	460.753
Abtb2	190.742	0.175323	0.13408	1.3076	0.191009	0.999739	0.999739	175.728	206.572	167.261	165.995	193.223	188.062	218.499	210.597
AC080157.1	0.817767	-0.959041	1.73845	-0.551666	0.581177	0.999739	0.999739	0	1.78079	1.73328	0.873657	0.990886	0	0	1.16352
AC093960.1	0.928269	0.808414	1.58008	0.511627	0.608912	0.999739	0.999739	0.887516	0.890397	0	0.873657	0.990886	0	1.45666	2.32704
AC093995.3	0.69256	-0.694161	2.29546	-0.302406	0.762342	0.999739	0.999739	0.887516	2.67119	0	0	1.98177	0	0	0
AC094055.1	196.476	-0.152277	0.137426	-1.10807	0.267833	0.999739	0.999739	201.466	219.038	198.46	209.678	166.469	222.429	170.429	183.836
AC094212.1	44.2132	0.14224	0.234633	0.606223	0.544367	0.999739	0.999739	45.2633	45.4102	43.332	34.0726	47.5625	48.6861	50.9831	38.3961
AC094643.2	356.064	-0.117718	0.130087	-0.904916	0.36551	0.999739	0.999739	373.644	371.296	410.787	325	368.61	284.479	377.275	337.42
AC095078.1	5.43251	-0.0140107	0.647191	-0.0216484	0.982728	0.999739	0.999739	7.10013	7.12318	2.59992	5.24194	6.9362	5.72777	2.91332	5.81759
AC095278.1	1.59826	0.949176	1.37191	0.691864	0.489023	0.999739	0.999739	1.77503	1.78079	0	0.873657	5.94532	0.954629	1.45666	0
AC095693.1	3163.45	0.0401409	0.142046	0.282591	0.77749	0.999739	0.999739	3827.86	2620.44	2974.31	3054.31	2991.49	2797.06	3176.97	3865.21
AC095825.1	0.21963	-1.08482	3.53315	-0.307039	0.758813	0.999739	0.999739	0	0.890397	0.86664	0	0	0	0	0
AC095947.1	3.50409	0.738741	0.818097	0.902999	0.366526	0.999739	0.999739	3.55007	1.78079	3.46656	1.74731	7.92709	2.86389	4.36998	2.32704
AC096404.1	9.8145	-0.957978	0.535412	-1.78923	0.0735771	0.999739	0.999739	15.9753	7.12318	13.8662	14.8522	2.97266	8.59166	5.82664	9.30814
AC096601.2	0.233068	0.355471	3.53381	0.100591	0.919875	0.999739	0.999739	0	0	0	0.873657	0.990886	0	0	0
AC097037.2	2.98759	1.03392	0.912872	1.1326	0.25738	0.999739	0.999739	4.43758	0.890397	0.86664	1.74731	5.94532	4.77315	2.91332	2.32704
AC097129.1	33.6453	-0.287708	0.272842	-1.05449	0.291661	0.999739	0.999739	46.1509	39.1775	33.7989	28.8307	28.7357	29.5935	29.1332	33.742
AC097183.1	36.6461	0.2584	0.283467	0.91157	0.361995	0.999739	0.999739	44.3758	27.6023	30.3324	30.578	36.6628	29.5935	45.1564	48.8677
AC097784.1	143.305	0.0576514	0.15524	0.371369	0.710363	0.999739	0.999739	134.902	163.833	141.262	120.565	143.678	129.83	164.603	147.767
AC097845.1	0.368039	-0.375916	3.13019	-0.120094	0.904409	0.999739	0.999739	0	1.78079	0	0	0	0	0	1.16352
AC098008.1	2.05189	-0.533253	1.02815	-0.518652	0.604003	0.999739	0.999739	2.66255	2.67119	0.86664	3.49463	1.98177	0.954629	1.45666	2.32704
AC098125.3	4.09039	-0.0346013	0.779584	-0.0443843	0.964598	0.999739	0.999739	5.3251	3.56159	6.06648	1.74731	1.98177	7.63703	2.91332	3.49055
AC098459.1	69.2872	-0.0524482	0.193362	-0.271244	0.786203	0.999739	0.999739	68.3388	68.5606	68.4645	77.7555	79.2709	72.5518	61.1797	58.1759
AC098547.2	1.23482	-0.236465	1.34118	-0.176311	0.860049	0.999739	0.999739	1.77503	2.67119	0.86664	0	0.990886	0.954629	1.45666	1.16352
AC098622.1	3.13306	-0.184697	1.03575	-0.178323	0.85847	0.999739	0.999739	6.21261	0.890397	5.19984	0.873657	0	2.86389	4.36998	4.65407
AC099108.1	1.00849	-1.50451	1.82163	-0.825915	0.408852	0.999739	0.999739	0.887516	2.67119	2.59992	0	0	1.90926	0	0
AC099294.1	4.47529	-0.0714268	0.730519	-0.0977754	0.922111	0.999739	0.999739	1.77503	4.45199	4.3332	7.86291	4.95443	5.72777	4.36998	2.32704
AC099450.1	9060.15	-0.161501	0.161371	-1.0008	0.316922	0.999739	0.999739	10431.9	9877.17	11379.8	6578.64	9942.55	7965.42	8158.75	8146.95
AC099453.1	18.898	-0.425156	0.361654	-1.17559	0.23976	0.999739	0.999739	19.5254	21.3695	25.1325	20.0941	9.90886	15.2741	18.9366	20.9433
AC103024.1	126.085	0.0688046	0.196224	0.350643	0.725856	0.999739	0.999739	126.027	104.176	164.662	97.8496	119.897	142.24	116.533	137.295
AC103090.1	0.375708	1.07099	2.61363	0.409772	0.681973	0.999739	0.999739	0.887516	0	0	0	0	0.954629	0	1.16352
AC103221.1	3.83456	0.592827	0.798565	0.742366	0.457866	0.999739	0.999739	5.3251	1.78079	2.59992	2.62097	1.98177	7.63703	2.91332	5.81759
AC103574.1	1.24168	0.878487	1.76941	0.496487	0.619551	0.999739	0.999739	1.77503	0	0	1.74731	4.95443	0	1.45666	0
AC105515.1	29.4962	-0.910991	0.349971	-2.60304	0.00923999	0.999739	0.999739	52.3635	41.8487	36.3989	23.5887	13.8724	24.8204	17.4799	25.5974
AC105531.1	1160.62	0.106342	0.131066	0.81136	0.417159	0.999739	0.999739	1057.03	1078.27	974.103	1361.16	1014.67	1290.66	1280.4	1228.67
AC105645.5	2.73498	0.83098	1.025	0.810711	0.417531	0.999739	0.999739	5.3251	0	0.86664	1.74731	2.97266	5.72777	2.91332	2.32704
AC105648.4	1.11962	-1.67786	1.6495	-1.01719	0.309061	0.999739	0.999739	0	2.67119	3.46656	0.873657	0.990886	0.954629	0	0
AC105648.5	1.58493	0.931834	1.44859	0.643269	0.52005	0.999739	0.999739	2.66255	1.78079	0	0	4.95443	0.954629	0	2.32704
AC105648.6	0.220147	-1.08965	3.5329	-0.308428	0.757757	0.999739	0.999739	0.887516	0	0	0.873657	0	0	0	0
AC105648.7	4.68954	-0.566026	0.773712	-0.731572	0.46443	0.999739	0.999739	7.10013	8.90397	1.73328	4.36829	1.98177	3.81852	7.2833	2.32704
AC105662.1	326.708	0.0222484	0.147036	0.151313	0.879729	0.999739	0.999739	307.968	313.42	392.588	283.939	351.765	316.937	272.395	374.653
AC106648.1	0.879115	-0.912656	1.72926	-0.527772	0.597657	0.999739	0.999739	1.77503	0.890397	0	1.74731	0	0	1.45666	1.16352
AC106663.3	0.439416	-2.0863	2.43439	-0.857011	0.391439	0.999739	0.999739	1.77503	0	0.86664	0.873657	0	0	0	0
AC106932.1	0.584856	-1.36505	2.03903	-0.669462	0.503201	0.999739	0.999739	1.77503	0	0.86664	0.873657	0	0	0	1.16352
AC107280.1	2.37682	1.08872	0.9716	1.12055	0.262481	0.999739	0.999739	0.887516	1.78079	1.73328	1.74731	1.98177	4.77315	1.45666	4.65407
AC107446.3	0.414273	1.08883	2.55736	0.425762	0.670281	0.999739	0.999739	0	0	0.86664	0	0.990886	0	1.45666	0
AC107580.1	10.5587	-0.319975	0.50619	-0.632125	0.527305	0.999739	0.999739	9.76268	8.90397	17.3328	11.3575	10.8997	10.5009	2.91332	12.7987
AC108595.1	0.664604	2.05337	2.26982	0.904638	0.365657	0.999739	0.999739	0.887516	0	0	0	2.97266	0	1.45666	0
AC108631.1	2.00255	0.013662	1.27147	0.0107451	0.991427	0.999739	0.999739	4.43758	0.890397	2.59992	0	1.98177	0	1.45666	4.65407
AC109048.1	1077.07	-0.186071	0.127329	-1.46134	0.143923	0.999739	0.999739	1159.98	1034.64	1309.49	1081.59	1200.95	858.211	1009.47	962.229
AC109427.1	0.436729	1.17587	2.53714	0.463461	0.643034	0.999739	0.999739	0	0	0	0.873657	0	0	1.45666	1.16352
AC109542.1	722.572	-0.0352194	0.157368	-0.223802	0.822911	0.999739	0.999739	773.914	682.935	903.905	565.256	835.317	691.151	713.763	614.337
AC109707.1	4.15765	-0.0151457	0.75338	-0.0201036	0.983961	0.999739	0.999739	3.55007	8.01357	2.59992	2.62097	2.97266	4.77315	2.91332	5.81759
AC109737.1	1.77298	0.0787002	1.1674	0.0674149	0.946251	0.999739	0.999739	3.55007	0.890397	1.73328	0.873657	0.990886	3.81852	0	2.32704
AC109942.1	248.247	-0.10505	0.169089	-0.621268	0.534423	0.999739	0.999739	202.354	222.599	269.525	334.611	234.84	253.931	244.719	223.395
AC110315.1	1.29338	-1.08887	1.63422	-0.666295	0.505223	0.999739	0.999739	5.3251	0	0.86664	0.873657	0	0.954629	0	2.32704
AC110474.1	1.76933	-0.299014	1.19864	-0.249462	0.803004	0.999739	0.999739	1.77503	3.56159	2.59992	0	1.98177	1.90926	0	2.32704
AC110824.1	0.486379	2.62253	2.76596	0.948144	0.343056	0.999739	0.999739	0	0	0	0	1.98177	1.90926	0	0
AC110837.1	2.40427	0.512324	1.02585	0.499413	0.617489	0.999739	0.999739	0.887516	1.78079	1.73328	3.49463	0.990886	1.90926	1.45666	6.98111
AC110846.1	1.6348	-0.293238	1.16652	-0.251377	0.801522	0.999739	0.999739	0.887516	3.56159	1.73328	0.873657	0.990886	0.954629	2.91332	1.16352
AC110981.1	0.594482	-0.235481	2.0871	-0.112827	0.910168	0.999739	0.999739	0	0.890397	0	1.74731	0	0.954629	0	1.16352
AC111292.2	0.815733	0.631222	1.87672	0.336343	0.736612	0.999739	0.999739	0.887516	0	0	1.74731	1.98177	1.90926	0	0
AC111647.1	0.576198	-0.259435	2.10424	-0.123291	0.901876	0.999739	0.999739	0.887516	0	0.86664	0.873657	1.98177	0	0	0
AC112557.1	11.2544	-0.254248	0.486625	-0.522473	0.601341	0.999739	0.999739	13.3127	18.6983	10.3997	6.98926	12.8815	11.4555	5.82664	10.4717
AC112568.1	3.23603	-0.288749	0.95003	-0.303937	0.761176	0.999739	0.999739	6.21261	0.890397	3.46656	3.49463	3.96354	0	4.36998	3.49055
AC112866.1	5.86044	0.0877617	0.627553	0.139847	0.888781	0.999739	0.999739	2.66255	4.45199	6.93312	8.73657	6.9362	6.6824	5.82664	4.65407
AC113621.2	0.290879	1.89758	3.51808	0.539379	0.589625	0.999739	0.999739	0	0	0	0	0	0	0	2.32704
AC113710.2	0.21666	-1.07927	3.53343	-0.305444	0.760028	0.999739	0.999739	0	0	1.73328	0	0	0	0	0
AC113710.3	0.469961	0.309787	2.52561	0.122658	0.902378	0.999739	0.999739	0.887516	0.890397	0	0	1.98177	0	0	0
AC113837.4	14.716	-0.610947	0.492327	-1.24094	0.214629	0.999739	0.999739	15.0878	22.2599	8.6664	24.4624	8.91798	5.72777	17.4799	15.1257
AC113837.6	75.2522	-0.224028	0.204896	-1.09337	0.274231	0.999739	0.999739	83.4265	80.1357	95.3304	66.3979	74.3165	69.6879	52.4397	80.2827
AC113837.7	15.9213	-0.0704651	0.422384	-0.166827	0.867506	0.999739	0.999739	21.3004	21.3695	11.2663	11.3575	21.7995	11.4555	16.0233	12.7987
AC113910.1	52.9156	-0.26171	0.262096	-0.998525	0.318025	0.999739	0.999739	66.5637	58.7662	61.5314	44.5565	57.4714	57.2777	48.0698	29.0879
AC114093.1	0.230628	0.355471	3.53381	0.100591	0.919875	0.999739	0.999739	0	0.890397	0	0	0	0.954629	0	0
AC114363.1	0.918296	-0.526062	1.84655	-0.284889	0.775729	0.999739	0.999739	1.77503	2.67119	0	0	0.990886	1.90926	0	0
AC114446.1	0.744949	0.338528	1.96574	0.172214	0.863269	0.999739	0.999739	1.77503	0	0.86664	0	0.990886	0	0	2.32704
AC114512.2	0.356929	1.03516	3.15172	0.328443	0.742577	0.999739	0.999739	0	0	0	0.873657	1.98177	0	0	0
AC115277.1	1.33784	-2.00535	1.47848	-1.35636	0.174984	0.999739	0.999739	1.77503	2.67119	2.59992	1.74731	0	1.90926	0	0
AC115322.1	0.880925	-3.08901	1.77626	-1.73905	0.0820263	0.999739	0.999739	3.55007	0.890397	1.73328	0.873657	0	0	0	0
AC115420.4	15.1905	-0.662763	0.50007	-1.32534	0.185058	0.999739	0.999739	20.4129	16.0271	20.7994	17.4731	23.7813	3.81852	8.73996	10.4717
AC117869.1	18.9105	-0.38477	0.453575	-0.848306	0.396268	0.999739	0.999739	25.738	19.5887	27.7325	12.2312	14.8633	19.0926	26.2199	5.81759
AC118094.1	4.25168	0.274024	0.820409	0.334009	0.738373	0.999739	0.999739	2.66255	4.45199	4.3332	3.49463	2.97266	0.954629	11.6533	3.49055
AC118165.1	272.536	-0.111848	0.109236	-1.02391	0.305877	0.999739	0.999739	297.318	259.996	280.791	293.549	252.676	253.931	265.112	276.917
AC118414.2	1.71696	1.1299	1.15985	0.974174	0.32997	0.999739	0.999739	0.887516	1.78079	0.86664	0.873657	2.97266	2.86389	0	3.49055
AC118490.1	2.16047	1.19384	1.0832	1.10215	0.270397	0.999739	0.999739	2.66255	0.890397	0	1.74731	3.96354	1.90926	1.45666	4.65407
AC118772.1	0.654344	-2.66257	2.16711	-1.22863	0.219211	0.999739	0.999739	0.887516	0	2.59992	1.74731	0	0	0	0
AC118772.2	4.06253	-0.135004	0.881282	-0.153191	0.878248	0.999739	0.999739	7.98765	3.56159	4.3332	0.873657	1.98177	0.954629	5.82664	6.98111
AC118772.4	16.1824	-0.0504037	0.451755	-0.111573	0.911162	0.999739	0.999739	15.9753	8.01357	14.7329	27.0834	14.8633	12.4102	13.1099	23.2704
AC118833.1	0.656876	-0.15115	2.06213	-0.073298	0.941569	0.999739	0.999739	0.887516	0	0	1.74731	0	0	1.45666	1.16352
AC118841.1	22.6359	0.332289	0.337946	0.98326	0.32548	0.999739	0.999739	21.3004	26.7119	15.5995	16.5995	30.7175	23.8657	27.6765	18.6163
AC119007.4	13.5129	0.504188	0.464513	1.08541	0.277739	0.999739	0.999739	5.3251	7.12318	18.1994	13.9785	16.8451	14.3194	16.0233	16.2892
AC119007.5	2.72059	-1.15959	0.937513	-1.23688	0.216132	0.999739	0.999739	4.43758	3.56159	3.46656	3.49463	1.98177	1.90926	2.91332	0
AC119015.1	111.423	-0.101688	0.201147	-0.505541	0.613179	0.999739	0.999739	109.165	121.094	142.129	89.9867	129.806	115.51	97.5962	86.1003
AC119332.1	43.4114	-0.02697	0.243484	-0.110767	0.911801	0.999739	0.999739	45.2633	40.9583	38.1321	50.6721	37.6537	39.1398	40.7865	54.6853
AC119459.2	0.997049	-0.354981	1.52486	-0.232796	0.81592	0.999739	0.999739	0.887516	1.78079	1.73328	0	0	0.954629	1.45666	1.16352
AC119603.1	1.07669	1.95209	1.67884	1.16276	0.244927	0.999739	0.999739	0	0.890397	0.86664	0	0	1.90926	1.45666	3.49055
AC119635.1	6.59503	-0.881352	0.634612	-1.3888	0.164892	0.999739	0.999739	11.5377	9.79437	4.3332	8.73657	7.92709	2.86389	2.91332	4.65407
AC119762.2	0.77986	0.397931	1.66257	0.239347	0.810836	0.999739	0.999739	0.887516	0	0.86664	0.873657	0.990886	0	1.45666	1.16352
AC120066.1	0.398742	-0.358313	3.0509	-0.117445	0.906507	0.999739	0.999739	0	0	1.73328	0	0	0	1.45666	0
AC120246.2	2.62415	-0.489388	1.20912	-0.404749	0.685662	0.999739	0.999739	3.55007	0	0.86664	7.86291	1.98177	3.81852	2.91332	0
AC120310.1	4.61265	-0.28004	0.683767	-0.409555	0.682132	0.999739	0.999739	4.43758	6.23278	6.06648	3.49463	5.94532	2.86389	4.36998	3.49055
AC120448.1	0.692691	-1.683	1.97334	-0.852867	0.393733	0.999739	0.999739	0	0.890397	0.86664	2.62097	0	0	0	1.16352
AC120568.1	8.05082	-0.444894	0.5998	-0.741738	0.458246	0.999739	0.999739	9.76268	6.23278	14.7329	6.1156	5.94532	7.63703	11.6533	2.32704
AC120594.1	99.0037	-0.0349958	0.214008	-0.163525	0.870105	0.999739	0.999739	125.14	90.8205	112.663	73.3872	108.997	110.737	77.203	93.0814
AC120949.4	19.7166	-0.440938	0.354742	-1.24298	0.213874	0.999739	0.999739	23.0754	29.3831	19.0661	19.2205	20.8086	12.4102	17.4799	16.2892
AC121209.1	0.592701	1.7992	2.34393	0.7676	0.442725	0.999739	0.999739	0	0	0	0.873657	0	0.954629	2.91332	0
AC121415.1	870.341	-0.191147	0.168345	-1.13545	0.256188	0.999739	0.999739	962.955	990.121	1104.1	656.116	958.187	841.028	684.63	765.595
AC121615.4	0.707655	1.07022	2.0482	0.522516	0.601311	0.999739	0.999739	0	0.890397	0.86664	0	0.990886	0	2.91332	0
AC121639.1	5.13667	-0.663743	0.753006	-0.881458	0.37807	0.999739	0.999739	2.66255	8.01357	3.46656	11.3575	3.96354	6.6824	1.45666	3.49055
AC123185.1	0.21927	-1.08482	3.53315	-0.307039	0.758813	0.999739	0.999739	0.887516	0	0.86664	0	0	0	0	0
AC123185.2	0.503426	2.66258	2.7841	0.956352	0.338894	0.999739	0.999739	0	0	0	0	0	2.86389	0	1.16352
AC123358.1	0.445199	-2.10335	3.45858	-0.608155	0.543085	0.999739	0.999739	0	3.56159	0	0	0	0	0	0
AC124205.1	28.9859	0.152946	0.428205	0.35718	0.720957	0.999739	0.999739	28.4005	40.9583	12.133	27.957	12.8815	35.3213	39.3298	34.9055
AC125757.1	88.8902	0.116744	0.209661	0.556822	0.577649	0.999739	0.999739	68.3388	93.4917	71.9311	106.586	75.3073	95.4629	109.249	90.7544
AC125920.1	2.47567	-1.63368	1.63944	-0.996487	0.319013	0.999739	0.999739	5.3251	0	9.53304	0	0	0	1.45666	3.49055
AC126156.1	0.222239	-1.09825	3.53247	-0.310901	0.755876	0.999739	0.999739	0.887516	0.890397	0	0	0	0	0	0
AC126482.2	0.554403	-1.35369	2.33978	-0.578555	0.56289	0.999739	0.999739	0	0	1.73328	1.74731	0	0.954629	0	0
AC126572.1	489.745	0.0614172	0.116521	0.52709	0.598131	0.999739	0.999739	459.733	456.774	438.52	562.635	499.407	482.088	466.131	552.671
AC126581.1	12.2341	-0.412732	0.535464	-0.770794	0.440829	0.999739	0.999739	20.4129	9.79437	19.9327	6.1156	7.92709	16.2287	5.82664	11.6352
AC126897.1	86.1082	-0.0667068	0.199659	-0.334104	0.738301	0.999739	0.999739	76.3264	96.1629	86.664	94.355	94.1342	101.191	77.203	62.83
AC127887.1	2.72693	0.0766132	0.916384	0.0836039	0.933371	0.999739	0.999739	2.66255	4.45199	0.86664	2.62097	0.990886	3.81852	2.91332	3.49055
AC127920.1	41.3192	0.5577	0.396358	1.40706	0.159409	0.999739	0.999739	39.9382	45.4102	34.6656	13.1049	34.681	47.7315	80.1163	34.9055
AC128207.1	910.403	-0.0827742	0.129496	-0.639203	0.522691	0.999739	0.999739	963.843	903.753	1094.57	784.544	1024.58	846.756	873.996	791.192
AC128207.2	3.70131	-0.72078	0.84154	-0.856501	0.391721	0.999739	0.999739	2.66255	4.45199	7.79976	3.49463	2.97266	0.954629	1.45666	5.81759
AC128212.1	33.404	-0.141336	0.271516	-0.520543	0.602685	0.999739	0.999739	35.5007	32.9447	34.6656	37.5673	35.6719	38.1852	30.5899	22.1068
AC128290.1	0.21927	-1.08482	3.53315	-0.307039	0.758813	0.999739	0.999739	0.887516	0	0.86664	0	0	0	0	0
AC128303.1	0.562075	-1.37291	2.05824	-0.667029	0.504753	0.999739	0.999739	0.887516	1.78079	0	0.873657	0	0.954629	0	0
AC128476.2	0.247722	1.75514	3.52567	0.497818	0.618612	0.999739	0.999739	0	0	0	0	1.98177	0	0	0
AC128500.1	0.23516	0.355471	3.53381	0.100591	0.919875	0.999739	0.999739	0	0.890397	0	0	0.990886	0	0	0
AC128848.1	140.265	-0.366233	0.259538	-1.4111	0.158216	0.999739	0.999739	121.59	153.148	240.926	117.07	147.642	143.194	107.793	90.7544
AC128859.3	3.05934	-0.0235697	0.94003	-0.0250733	0.979996	0.999739	0.999739	5.3251	4.45199	0.86664	1.74731	0.990886	3.81852	1.45666	5.81759
AC128901.1	0.509682	-0.943558	2.40938	-0.391619	0.69534	0.999739	0.999739	0.887516	0	1.73328	0	0	0	1.45666	0
AC128960.1	150.679	-0.0045995	0.219778	-0.0209279	0.983303	0.999739	0.999739	178.391	154.039	179.394	91.734	174.396	134.603	160.233	132.641
AC128967.1	0.502368	1.58705	2.40975	0.658596	0.510155	0.999739	0.999739	0	0	0	0.873657	1.98177	0	0	1.16352
AC128967.3	0.346987	1.00517	3.17885	0.316206	0.751846	0.999739	0.999739	0	0	0.86664	0	0	1.90926	0	0
AC129049.1	2.05591	-0.183228	1.00504	-0.18231	0.855339	0.999739	0.999739	0.887516	2.67119	3.46656	1.74731	1.98177	1.90926	1.45666	2.32704
AC129365.1	2.11152	0.554557	1.22777	0.45168	0.6515	0.999739	0.999739	0	0.890397	1.73328	4.36829	3.96354	4.77315	0	1.16352
AC129753.3	0.412711	1.07094	2.55604	0.418985	0.675227	0.999739	0.999739	0	0.890397	0	0	0	0.954629	1.45666	0
AC130053.4	6.55293	0.0756561	0.630313	0.120029	0.90446	0.999739	0.999739	5.3251	5.34238	6.06648	8.73657	9.90886	1.90926	5.82664	9.30814
AC130232.2	150.018	-0.00666281	0.152227	-0.043769	0.965089	0.999739	0.999739	135.79	165.614	154.262	145.901	174.396	140.33	155.863	127.987
AC130391.1	0.403962	-0.375651	3.04042	-0.123552	0.90167	0.999739	0.999739	1.77503	0	0	0	0	0	1.45666	0
AC130391.3	12.4742	0.252616	0.509737	0.495581	0.62019	0.999739	0.999739	11.5377	16.0271	13.8662	4.36829	8.91798	20.0472	8.73996	16.2892
AC130862.2	0.911006	0.0321208	1.70174	0.0188752	0.984941	0.999739	0.999739	0	0.890397	0.86664	1.74731	0	0	1.45666	2.32704
AC130970.1	52.4063	0.357484	0.297096	1.20326	0.228876	0.999739	0.999739	42.6008	50.7526	64.1313	27.0834	70.3529	66.824	39.3298	58.1759
AC131360.1	165.876	0.0339651	0.131989	0.257332	0.796922	0.999739	0.999739	168.628	171.847	145.595	169.489	177.369	161.332	173.342	159.402
AC131360.2	38.4892	0.283725	0.339435	0.835876	0.403225	0.999739	0.999739	32.8381	40.9583	19.9327	44.5565	23.7813	41.049	52.4397	52.3583
AC131360.3	1.45168	0.753301	1.41027	0.534153	0.593236	0.999739	0.999739	0	2.67119	1.73328	0	2.97266	1.90926	0	2.32704
AC131411.2	9.17294	-0.319589	0.521891	-0.612367	0.540295	0.999739	0.999739	14.2003	11.5752	8.6664	6.1156	7.92709	8.59166	11.6533	4.65407
AC131483.1	0.76126	1.32005	1.96662	0.671224	0.502078	0.999739	0.999739	0	0	1.73328	0	0.990886	1.90926	1.45666	0
AC131806.3	0.941955	-0.448176	1.56208	-0.286909	0.774182	0.999739	0.999739	2.66255	0.890397	0	0.873657	0.990886	0.954629	0	1.16352
AC132020.1	35.6075	-0.16147	0.314168	-0.51396	0.60728	0.999739	0.999739	30.1756	52.5334	36.3989	32.3253	35.6719	43.9129	18.9366	34.9055
AC132539.2	0.673699	-1.68805	1.95019	-0.865582	0.38672	0.999739	0.999739	1.77503	0.890397	1.73328	0	0.990886	0	0	0
AC132539.3	0.362977	-0.361859	2.64981	-0.13656	0.891378	0.999739	0.999739	0	0	0.86664	0.873657	0	0	0	1.16352
AC133055.1	2.22141	-0.620024	1.01736	-0.609443	0.542231	0.999739	0.999739	2.66255	3.56159	0.86664	3.49463	0.990886	0.954629	2.91332	2.32704
AC133270.1	33.5997	0.00629833	0.328505	0.0191727	0.984703	0.999739	0.999739	23.9629	35.6159	25.9992	48.0511	23.7813	29.5935	36.4165	45.3772
AC133403.1	0.850592	2.45313	1.90381	1.28854	0.197559	0.999739	0.999739	0	0	0.86664	0	0.990886	0	1.45666	3.49055
AC134087.1	2.1774	-0.833412	1.07445	-0.775664	0.437947	0.999739	0.999739	2.66255	0.890397	5.19984	2.62097	2.97266	1.90926	0	1.16352
AC134160.1	0.499569	1.58288	2.12633	0.744417	0.456624	0.999739	0.999739	0.887516	0	0	0	0.990886	0.954629	0	1.16352
AC134651.1	0.576198	-0.259435	2.10424	-0.123291	0.901876	0.999739	0.999739	0.887516	0	0.86664	0.873657	1.98177	0	0	0
AC135142.1	3.86073	0.207257	0.825661	0.251019	0.801799	0.999739	0.999739	1.77503	4.45199	4.3332	3.49463	0.990886	4.77315	8.73996	2.32704
AC135389.1	0.866093	-0.0445417	1.91203	-0.0232955	0.981415	0.999739	0.999739	0	0.890397	2.59992	0	1.98177	0	1.45666	0
AC135409.1	4.20271	0.19496	0.822484	0.237039	0.812627	0.999739	0.999739	2.66255	8.01357	3.46656	1.74731	7.92709	5.72777	2.91332	1.16352
AC135826.1	13.9806	0.371311	0.589299	0.630089	0.528637	0.999739	0.999739	15.0878	8.01357	3.46656	21.8414	5.94532	15.2741	24.7632	17.4528
AC136482.1	0.367679	-0.374234	2.64261	-0.141615	0.887384	0.999739	0.999739	0.887516	0.890397	0	0	0	0	0	1.16352
AC136584.1	0.926267	-1.239	1.69986	-0.728879	0.466076	0.999739	0.999739	0.887516	2.67119	1.73328	0	0	0.954629	0	1.16352
AC136588.2	4.23651	0.994031	0.807627	1.2308	0.218396	0.999739	0.999739	0.887516	3.56159	3.46656	3.49463	5.94532	9.54629	5.82664	1.16352
AC136661.1	21.4424	0.641633	0.35317	1.81678	0.0692504	0.999739	0.999739	12.4252	19.5887	19.0661	15.7258	25.763	18.138	24.7632	36.069
AC139642.2	0.771583	-2.89744	1.81602	-1.59549	0.110603	0.999739	0.999739	0.887516	2.67119	0.86664	1.74731	0	0	0	0
AC140988.1	3.1173	-0.822191	0.88774	-0.926162	0.354362	0.999739	0.999739	4.43758	6.23278	2.59992	2.62097	1.98177	0.954629	1.45666	4.65407
AC141102.1	40.998	-0.191667	0.269097	-0.712259	0.476304	0.999739	0.999739	53.251	48.9718	44.1986	28.8307	35.6719	44.8676	34.9598	37.2326
AC141169.3	3.78823	0.312187	0.809501	0.385654	0.699753	0.999739	0.999739	5.3251	1.78079	3.46656	2.62097	2.97266	1.90926	8.73996	3.49055
AC141344.2	0.682966	-0.680986	1.70696	-0.398946	0.689933	0.999739	0.999739	0.887516	0.890397	0.86664	0.873657	0.990886	0.954629	0	0
AC141489.1	17.103	0.11219	0.440147	0.254892	0.798806	0.999739	0.999739	18.6378	15.1367	20.7994	10.4839	17.836	7.63703	27.6765	18.6163
AC141966.1	0.897767	2.51163	1.89586	1.3248	0.185238	0.999739	0.999739	0	0	0.86664	0	0.990886	0.954629	4.36998	0
AC142154.1	6.48345	1.04639	0.631667	1.65655	0.0976099	0.999739	0.999739	2.66255	2.67119	5.19984	6.1156	4.95443	6.6824	13.1099	10.4717
AC142458.1	5.37067	0.164356	0.756273	0.217324	0.827956	0.999739	0.999739	0.887516	6.23278	6.93312	6.1156	2.97266	3.81852	4.36998	11.6352
Ac1576	1.52247	-0.849599	1.21877	-0.697097	0.485742	0.999739	0.999739	2.66255	0.890397	1.73328	2.62097	0.990886	0.954629	0	2.32704
AC239701.1	175.947	-0.151218	0.185241	-0.816336	0.414308	0.999739	0.999739	153.54	189.655	156.862	240.256	138.724	189.971	179.169	159.402
AC242953.1	1.50169	-1.1202	1.39057	-0.805566	0.420493	0.999739	0.999739	0.887516	3.56159	0.86664	2.62097	0	0	2.91332	1.16352
Acaa1a	430.078	-0.00562721	0.137159	-0.0410269	0.967274	0.999739	0.999739	452.633	410.473	503.518	358.199	406.263	463.95	374.362	471.225
Acaa1b	28.5828	0.0154502	0.287902	0.0536649	0.957202	0.999739	0.999739	27.513	24.9311	33.7989	27.957	35.6719	29.5935	24.7632	24.4339
Acaa2	433.124	-0.222426	0.212869	-1.0449	0.296071	0.999739	0.999739	576.886	351.707	516.517	419.355	470.671	299.754	517.114	312.986
Acaca	1896.54	-0.0574299	0.137986	-0.416202	0.677262	0.999739	0.999739	1730.66	1962.44	1736.75	2306.45	1470.48	2053.41	1962.12	1950.06
Acacb	124.867	0.0707551	0.167982	0.421206	0.673605	0.999739	0.999739	136.678	107.738	111.797	130.175	102.061	133.648	138.383	138.459
Acad10	1474.15	-0.116196	0.13137	-0.884497	0.376428	0.999739	0.999739	1822.96	1445.11	1650.95	1214.38	1501.19	1309.75	1477.05	1371.79
Acad11	255.069	-0.145168	0.138418	-1.04876	0.294289	0.999739	0.999739	276.018	272.461	305.057	218.414	270.512	229.111	237.436	231.54
Acad8	728.183	-0.037651	0.0854055	-0.44085	0.659322	0.999739	0.999739	746.401	711.427	700.245	793.281	760.01	694.97	703.567	715.563
Acad9	1185.48	0.0327645	0.0771204	0.424849	0.670947	0.999739	0.999739	1141.35	1194.91	1181.23	1173.32	1296.08	1215.24	1133.28	1148.39
Acadl	646.929	-0.0873554	0.101098	-0.864067	0.387551	0.999739	0.999739	716.226	628.62	684.645	635.149	665.876	548.912	652.584	643.425
Acadm	576.575	-0.0154265	0.115603	-0.133443	0.893843	0.999739	0.999739	586.648	627.73	617.047	488.374	638.131	570.868	552.074	531.728
Acads	376.736	-0.138486	0.14308	-0.967888	0.3331	0.999739	0.999739	454.408	380.2	435.92	308.401	387.436	322.665	364.165	360.69
Acadsb	1468.41	0.0242777	0.0935011	0.259652	0.795133	0.999739	0.999739	1349.91	1562.65	1353.69	1556.86	1533.89	1341.25	1512.01	1537.01
Acadvl	1021.64	-0.169927	0.0992554	-1.71201	0.0868941	0.999739	0.999739	1206.13	1058.68	1122.3	939.181	982.959	908.807	978.875	976.191
Acan	96.5785	-0.120643	0.22647	-0.532711	0.594234	0.999739	0.999739	105.614	81.0261	73.6644	142.406	93.1433	98.3268	88.8562	89.5909
Acap1	3.84579	0.115716	0.861064	0.134388	0.893096	0.999739	0.999739	0.887516	4.45199	5.19984	4.36829	8.91798	2.86389	2.91332	1.16352
Acap2	1969.78	0.0644932	0.147891	0.436087	0.662773	0.999739	0.999739	1656.11	2119.14	1602.42	2324.8	1715.22	1992.31	2001.45	2346.82
Acap3	2171.92	0.0387078	0.0675328	0.57317	0.56653	0.999739	0.999739	2138.91	2008.74	2153.6	2269.76	2192.83	2189.92	2186.45	2235.12
Acat1	1961.49	-0.217344	0.0837847	-2.59408	0.00948457	0.999739	0.999739	2089.21	2136.95	2261.06	1950.88	1976.82	1786.11	1707.21	1783.67
Acat2	998.902	-0.119972	0.136228	-0.88067	0.378496	0.999739	0.999739	931.005	1104.09	1196.83	932.192	1076.1	1080.64	830.296	840.06
Acat2l1	24.6032	0.20415	0.392394	0.520268	0.602877	0.999739	0.999739	20.4129	35.6159	23.3993	12.2312	19.8177	38.1852	26.2199	20.9433
Acbd3	513.111	0.128621	0.12052	1.06722	0.285874	0.999739	0.999739	472.159	495.061	421.187	572.245	485.534	547.002	534.594	577.105
Acbd4	1683.39	-0.0820164	0.12698	-0.645902	0.518343	0.999739	0.999739	2052.83	1534.15	1796.54	1541.13	1860.88	1441.49	1675.16	1564.93
Acbd5	1167.98	0.0363438	0.0858381	0.4234	0.672004	0.999739	0.999739	1104.96	1240.32	1179.5	1085.96	1119.7	1126.46	1245.44	1241.47
Acbd6	793.553	-0.0455799	0.108033	-0.421907	0.673093	0.999739	0.999739	881.304	776.426	855.373	712.03	856.126	718.836	732.7	815.626
Accs	60.2362	-0.337917	0.20545	-1.64477	0.100018	0.999739	0.999739	71.0013	64.999	71.0644	62.9033	51.5261	64.9148	46.6131	48.8677
Accsl	2.19676	1.21341	1.14226	1.06229	0.288102	0.999739	0.999739	3.55007	0	0	1.74731	3.96354	1.90926	2.91332	3.49055
Acd	868.352	-0.15815	0.0984574	-1.60627	0.108214	0.999739	0.999739	999.343	816.494	920.371	928.697	904.679	790.433	779.313	807.481
Ace	249.351	-0.00708016	0.128856	-0.0549462	0.956181	0.999739	0.999739	241.404	276.913	224.46	255.108	225.922	240.567	288.419	242.012
Ace2	44.2516	0.285191	0.252002	1.1317	0.257761	0.999739	0.999739	43.4883	31.1639	44.1986	40.1882	35.6719	48.6861	52.4397	58.1759
Acer1	3.5054	0.151782	0.797795	0.190251	0.849112	0.999739	0.999739	2.66255	2.67119	1.73328	6.1156	2.97266	2.86389	4.36998	4.65407
Acer2	191.296	0.358258	0.245869	1.45711	0.145086	0.999739	0.999739	174.841	126.436	182.861	187.836	194.214	336.984	157.319	169.874
Acer3	457.869	0.00705674	0.118749	0.0594258	0.952613	0.999739	0.999739	433.108	541.361	449.786	403.63	470.671	484.952	450.108	429.338
Ache	1194.92	0.0629299	0.0826967	0.760972	0.446674	0.999739	0.999739	1212.35	1085.39	1165.63	1211.76	1126.64	1264.88	1210.48	1282.2
Acin1	2294.56	-0.101547	0.116116	-0.874536	0.381827	0.999739	0.999739	2478.83	2317.7	2144.07	2558.07	2210.67	1805.2	2390.38	2451.53
Ackr1	391.695	0.14931	0.175068	0.852868	0.393733	0.999739	0.999739	329.269	285.817	410.787	460.417	472.653	359.895	353.968	460.753
Ackr2	88.5641	-0.182158	0.204671	-0.890002	0.373465	0.999739	0.999739	102.064	79.2453	92.7304	103.965	105.034	90.6898	68.463	66.3205
Ackr3	298.607	0.0915816	0.148305	0.61752	0.536892	0.999739	0.999739	219.217	316.091	318.923	302.285	274.475	326.483	298.615	332.766
Ackr4	19.7433	0.24014	0.449663	0.534043	0.593312	0.999739	0.999739	15.9753	8.90397	32.9323	14.8522	22.7904	29.5935	18.9366	13.9622
Acly	4305.13	-0.0227837	0.0827398	-0.275366	0.783035	0.999739	0.999739	4126.95	4294.38	4163.34	4771.04	3919.95	4511.58	4374.35	4279.42
Aco1	721.188	0.0381246	0.0955645	0.398941	0.689937	0.999739	0.999739	746.401	694.51	626.58	779.302	721.365	735.064	723.96	742.324
Aco2	11207.6	-0.0515079	0.0615843	-0.83638	0.402941	0.999739	0.999739	11884.7	11080.1	11666.7	10998.5	11301.1	10948.6	11255.6	10525.2
Acod1	0.326744	-1.66059	3.18931	-0.520675	0.602593	0.999739	0.999739	0	0	0.86664	1.74731	0	0	0	0
Acot1	26.6126	-0.100056	0.314529	-0.318115	0.750398	0.999739	0.999739	33.7256	23.1503	32.9323	20.0941	23.7813	27.6842	30.5899	20.9433
Acot11	97.2369	0.179069	0.226819	0.78948	0.429832	0.999739	0.999739	79.8765	100.615	69.3312	114.449	72.3347	117.419	117.989	105.88
Acot12	0.47835	1.51517	2.43013	0.623491	0.532962	0.999739	0.999739	0	0.890397	0	0	1.98177	0.954629	0	0
Acot13	384.759	-0.118264	0.155448	-0.760792	0.446781	0.999739	0.999739	426.008	414.035	454.986	308.401	420.136	400.944	345.228	308.332
Acot2	186.882	-0.154683	0.148892	-1.03889	0.298856	0.999739	0.999739	230.754	178.079	203.66	175.605	189.259	162.287	158.776	196.634
Acot3	7.77854	0.191866	0.600506	0.319508	0.749341	0.999739	0.999739	6.21261	10.6848	8.6664	3.49463	4.95443	13.3648	10.1966	4.65407
Acot4	112.848	-0.403918	0.262248	-1.54022	0.123508	0.999739	0.999739	123.365	95.2725	159.462	136.29	147.642	64.9148	93.2262	82.6098
Acot5	12.5482	0.265969	0.428192	0.621143	0.534505	0.999739	0.999739	14.2003	10.6848	9.53304	11.3575	18.8268	13.3648	13.1099	9.30814
Acot6	14.9959	0.104909	0.421874	0.248674	0.803613	0.999739	0.999739	9.76268	20.4791	12.9996	14.8522	11.8906	22.9111	13.1099	13.9622
Acot7	4046.09	0.0100129	0.0922411	0.108552	0.913558	0.999739	0.999739	4142.93	3704.05	4393.86	3889.52	4413.41	4242.37	3879.08	3703.48
Acot8	356.154	0.0101265	0.159275	0.0635788	0.949306	0.999739	0.999739	398.495	316.091	433.32	272.581	363.655	392.353	330.662	342.074
Acot9	969.949	-0.0928257	0.12567	-0.738645	0.460123	0.999739	0.999739	938.992	1017.72	1110.17	940.055	1051.33	1060.59	862.342	778.393
Acox1	2513.13	-0.060839	0.0816964	-0.744697	0.456455	0.999739	0.999739	2466.41	2705.92	2393.66	2696.98	2256.25	2537.4	2560.81	2487.6
Acox2	7.29505	-0.744046	0.607059	-1.22566	0.220328	0.999739	0.999739	14.2003	10.6848	6.06648	5.24194	4.95443	3.81852	8.73996	4.65407
Acox3	788.341	-0.0468044	0.118744	-0.394162	0.693461	0.999739	0.999739	790.777	863.685	669.912	880.646	750.101	861.075	792.423	698.111
Acoxl	0.612791	0.876009	2.08238	0.420677	0.673991	0.999739	0.999739	0	0.890397	0.86664	0	1.98177	0	0	1.16352
Acp1	528.626	-0.0522933	0.105042	-0.49783	0.618604	0.999739	0.999739	488.134	562.731	578.915	525.068	551.924	557.503	486.524	478.206
Acp2	906.86	-0.0674072	0.0787062	-0.85644	0.391754	0.999739	0.999739	948.755	891.287	930.771	940.929	827.39	936.491	903.129	876.129
Acp3	3.08555	-0.990786	0.955885	-1.03651	0.299963	0.999739	0.999739	7.10013	4.45199	3.46656	1.74731	1.98177	4.77315	0	1.16352
Acp4	2.85759	-0.935065	0.891683	-1.04865	0.294339	0.999739	0.999739	4.43758	4.45199	3.46656	2.62097	1.98177	0.954629	1.45666	3.49055
Acp5	58.3445	-0.267064	0.255101	-1.0469	0.295147	0.999739	0.999739	60.3511	56.095	77.9976	61.156	69.362	58.2324	50.9831	32.5785
Acp6	275.431	-0.172554	0.105807	-1.63083	0.102926	0.999739	0.999739	279.568	313.42	288.591	286.56	266.548	262.523	254.915	251.32
Acp7	1.56584	0.852751	1.29033	0.660877	0.508691	0.999739	0.999739	1.77503	1.78079	0.86664	0	0	2.86389	2.91332	2.32704
Acr	5.65249	-0.357971	0.603382	-0.593274	0.552998	0.999739	0.999739	6.21261	5.34238	6.93312	6.98926	5.94532	4.77315	4.36998	4.65407
Acrbp	218.262	-0.034006	0.143839	-0.236417	0.813109	0.999739	0.999739	229.867	207.463	244.392	200.941	242.767	174.697	221.412	224.559
Acsbg1	4720.74	-0.102312	0.085621	-1.19494	0.232109	0.999739	0.999739	5168.9	5006.7	5157.37	4218.89	4514.48	4553.58	4629.26	4516.78
Acsbg2	0.457072	0.286507	2.98011	0.0961397	0.92341	0.999739	0.999739	0	0	0	1.74731	0	1.90926	0	0
Acsbg3	1.59437	-2.23118	1.53694	-1.4517	0.146584	0.999739	0.999739	5.3251	1.78079	0	3.49463	0.990886	0	0	1.16352
Acsf2	1020.49	-0.0436846	0.0905481	-0.482446	0.629489	0.999739	0.999739	1125.37	1095.19	994.036	928.697	1023.59	967.994	1022.58	1006.44
Acsf3	358.269	-0.070029	0.140457	-0.49858	0.618075	0.999739	0.999739	355.894	349.036	417.72	346.842	434.008	324.574	302.985	335.093
Acsl1	1186.4	-0.0547813	0.0888557	-0.61652	0.537551	0.999739	0.999739	1222.11	1211.83	1169.96	1232.73	1058.27	1308.8	1150.76	1136.76
Acsl3	5176.11	-0.0389284	0.0854408	-0.455618	0.648665	0.999739	0.999739	4801.46	5583.68	5296.03	5305.72	5394.38	5463.34	4764.73	4799.51
Acsl4	2751.81	0.0679701	0.0976497	0.696061	0.486391	0.999739	0.999739	2464.63	2890.23	2539.25	2855.11	2742.77	3156.96	2801.16	2564.39
Acsl5	1996.19	-0.137754	0.0990651	-1.39054	0.164366	0.999739	0.999739	2169.98	1932.16	2228.13	2037.37	1967.9	2116.41	1857.24	1660.34
Acsl6	3140.32	-0.00942892	0.0855819	-0.110174	0.912271	0.999739	0.999739	2960.75	3225.91	2958.71	3456.19	2874.56	3224.74	3163.86	3257.85
Acsm1	2.58401	-0.507722	0.942589	-0.538647	0.590131	0.999739	0.999739	2.66255	2.67119	4.3332	2.62097	0.990886	4.77315	1.45666	1.16352
Acsm3	13.9844	0.353315	0.546801	0.64615	0.518182	0.999739	0.999739	17.7503	16.0271	4.3332	10.4839	12.8815	10.5009	30.5899	9.30814
Acsm5	76.9958	-0.180567	0.272887	-0.661693	0.508168	0.999739	0.999739	100.289	111.3	61.5314	54.1667	90.1706	61.0963	75.7463	61.6664
Acss1	979.02	-0.112104	0.0842795	-1.33014	0.183471	0.999739	0.999739	1051.71	1050.67	946.37	1022.18	946.296	1014.77	879.822	920.342
Acss2	1478.78	-0.147446	0.0787625	-1.87204	0.0612015	0.999739	0.999739	1521.2	1453.13	1629.28	1612.77	1356.52	1467.26	1456.66	1333.39
Acss3	80.2203	0.118043	0.299757	0.393794	0.693733	0.999739	0.999739	93.1892	89.0397	42.4653	82.1238	63.4167	57.2777	104.879	109.371
Acta1	317.826	-0.00379165	0.160373	-0.0236427	0.981138	0.999739	0.999739	356.782	283.146	375.255	258.602	381.491	304.527	300.072	282.735
Acta2	111.172	-0.262615	0.1941	-1.35299	0.176059	0.999739	0.999739	120.702	89.0397	139.529	134.543	97.1068	84.0074	115.076	109.371
Actb	37950.2	-0.0830557	0.0596134	-1.39324	0.163547	0.999739	0.999739	40534.6	37491.1	40676.6	37467.7	36650.9	37446.3	36308.7	37025.5
Actc1	2.05553	0.679884	1.2685	0.535974	0.591976	0.999739	0.999739	2.66255	0	2.59992	0.873657	0.990886	0	5.82664	3.49055
Actg2	2.56562	-0.145308	1.03503	-0.140391	0.888351	0.999739	0.999739	1.77503	1.78079	4.3332	2.62097	0.990886	0	4.36998	4.65407
Actl10	0.21963	-1.08482	3.53315	-0.307039	0.758813	0.999739	0.999739	0	0.890397	0.86664	0	0	0	0	0
Actl11	0.233068	0.355471	3.53381	0.100591	0.919875	0.999739	0.999739	0	0	0	0.873657	0.990886	0	0	0
Actl6a	229.05	-0.079395	0.125478	-0.632739	0.526904	0.999739	0.999739	234.304	254.654	222.726	228.898	212.05	202.381	221.412	255.974
Actl6b	1486.86	-0.0730602	0.110124	-0.663437	0.507051	0.999739	0.999739	1633.92	1380.12	1695.15	1389.11	1628.03	1308.8	1415.87	1443.93
Actl7b	2.64847	-0.0342683	0.994507	-0.0344575	0.972512	0.999739	0.999739	3.55007	1.78079	2.59992	2.62097	0.990886	3.81852	5.82664	0
Actn1	1488.79	0.0127334	0.133248	0.0955615	0.923869	0.999739	0.999739	1388.96	1491.42	1267.03	1779.64	1260.41	1448.17	1644.57	1630.09
Actn2	532.516	-0.227639	0.136972	-1.66193	0.0965259	0.999739	0.999739	615.936	476.362	548.583	655.243	422.118	463.95	522.941	554.998
Actn3	21.9621	-0.317092	0.337801	-0.938694	0.347888	0.999739	0.999739	22.1879	29.3831	23.3993	21.8414	20.8086	15.2741	27.6765	15.1257
Actn4	2552.66	0.0457657	0.0580712	0.788097	0.43064	0.999739	0.999739	2532.97	2442.36	2512.39	2559.82	2525.77	2618.55	2639.47	2589.99
Actr10	2234.54	-0.013127	0.0856794	-0.153211	0.878232	0.999739	0.999739	2105.19	2264.28	2336.46	2275.88	2458.39	2280.61	2072.83	2082.7
Actr1a	5811.86	0.0139035	0.0634915	0.218981	0.826664	0.999739	0.999739	5831.87	5616.62	5913.95	5775.75	6091.97	6045.67	5691.17	5527.87
Actr1b	4255.55	-0.0316941	0.0665328	-0.476368	0.633812	0.999739	0.999739	4258.3	4044.18	4487.46	4420.7	4323.24	4314.92	4150.02	4045.55
Actr2	13002.4	-0.0475014	0.0675045	-0.703678	0.481633	0.999739	0.999739	12336.5	13204.6	13174.7	14151.5	13003.4	13160.5	12582.6	12405.4
Actr3	7131.63	-0.0795848	0.0602029	-1.32194	0.186187	0.999739	0.999739	7141.84	7238.93	7295.37	7639.26	7286.98	6906.74	6744.33	6799.6
Actr3b	2058.69	0.000446387	0.0854296	0.00522521	0.995831	0.999739	0.999739	1977.39	1951.75	2167.47	2138.71	2263.18	2075.36	1995.62	1900.02
Actr5	163.53	-0.183492	0.135383	-1.35536	0.175304	0.999739	0.999739	194.366	162.943	177.661	160.753	162.505	149.877	155.863	144.276
Actr6	527.08	-0.115414	0.133598	-0.863888	0.387649	0.999739	0.999739	493.459	600.128	563.316	537.299	614.349	508.817	479.241	420.03
Actr8	963.585	-0.0209007	0.0828452	-0.252286	0.80082	0.999739	0.999739	946.98	954.506	1009.64	971.507	1048.36	898.306	949.742	929.651
Actrt3	6.28286	0.892682	0.662332	1.34779	0.177727	0.999739	0.999739	5.3251	0.890397	6.93312	4.36829	6.9362	5.72777	7.2833	12.7987
Acvr1	839.089	-0.0606207	0.0977223	-0.620336	0.535037	0.999739	0.999739	812.965	828.96	793.842	990.727	803.609	820.981	827.383	834.242
Acvr1b	2278.63	0.0788236	0.103103	0.76451	0.444563	0.999739	0.999739	1985.37	2246.47	2030.54	2602.62	2233.46	2384.66	2404.95	2341
Acvr1c	29.5952	0.0823152	0.426233	0.193123	0.846863	0.999739	0.999739	20.4129	32.0543	13.8662	48.0511	18.8268	22.9111	42.2431	38.3961
Acvr2a	398.535	0.297455	0.230836	1.2886	0.197538	0.999739	0.999739	268.03	367.734	260.859	532.931	335.91	459.177	533.137	430.502
Acvr2b	23.7826	0.401846	0.399667	1.00545	0.314679	0.999739	0.999739	13.3127	18.6983	13.8662	35.8199	17.836	29.5935	32.0465	29.0879
Acvrl1	152.174	0.00898989	0.155504	0.0578114	0.953899	0.999739	0.999739	157.978	141.573	159.462	146.774	124.852	170.879	176.256	139.622
Acy1	560.078	-0.0457959	0.124257	-0.368557	0.712458	0.999739	0.999739	622.149	576.977	589.315	489.248	648.04	547.957	505.461	501.476
Acyp1	372.903	0.0461007	0.155494	0.296479	0.766864	0.999739	0.999739	363.882	378.419	424.653	302.285	468.689	381.852	342.315	321.131
Acyp2	1355.79	-0.135856	0.0950723	-1.42898	0.153011	0.999739	0.999739	1339.26	1476.28	1555.62	1308.74	1410.03	1307.84	1251.27	1197.26
Ada	9.82329	-0.146915	0.50531	-0.290743	0.771248	0.999739	0.999739	14.2003	13.356	8.6664	5.24194	10.8997	10.5009	8.73996	6.98111
Adad1	1.12858	0.65481	1.44096	0.454426	0.649522	0.999739	0.999739	1.77503	0	1.73328	0	0.990886	1.90926	1.45666	1.16352
Adad2	1.87549	0.830058	1.25506	0.661372	0.508374	0.999739	0.999739	2.66255	0.890397	1.73328	0	1.98177	1.90926	5.82664	0
Adal	0.656359	-0.163278	1.88439	-0.0866479	0.930951	0.999739	0.999739	0	0.890397	0.86664	0.873657	0	0	1.45666	1.16352
Adam10	1246.81	0.170798	0.105224	1.62318	0.10455	0.999739	0.999739	1068.57	1346.28	1104.97	1171.57	1178.16	1387.08	1392.57	1325.25
Adam11	4479.68	0.0283594	0.144371	0.196434	0.844271	0.999739	0.999739	4686.09	3810.9	3893.81	5350.28	3716.81	4304.42	4852.13	5223.03
Adam12	112.731	-0.10845	0.182149	-0.595392	0.551582	0.999739	0.999739	91.4142	122.875	131.729	122.312	93.1433	124.102	97.5962	118.679
Adam15	1304.57	0.025179	0.0783836	0.321228	0.748037	0.999739	0.999739	1245.19	1208.27	1403.96	1315.73	1335.71	1330.75	1306.62	1290.34
Adam17	465.469	0.0528961	0.130212	0.406231	0.684573	0.999739	0.999739	475.709	505.746	435.053	408.871	424.099	411.445	534.594	528.237
Adam19	581.732	-0.0295347	0.155335	-0.190136	0.849203	0.999739	0.999739	512.097	570.744	498.318	769.692	518.233	595.689	543.334	645.752
Adam1a	107.459	0.0898896	0.268397	0.334914	0.73769	0.999739	0.999739	118.04	97.9437	83.1974	116.196	96.116	62.0509	126.729	159.402
Adam2	0.471307	-0.937706	2.45907	-0.381325	0.702962	0.999739	0.999739	0	0	1.73328	0.873657	0	0	0	1.16352
Adam21	0.222599	-1.09825	3.53247	-0.310901	0.755876	0.999739	0.999739	0	1.78079	0	0	0	0	0	0
Adam22	580.261	0.421927	0.235774	1.78954	0.0735282	0.999739	0.999739	362.107	531.567	357.922	732.125	471.662	778.023	721.047	687.639
Adam23	1077.68	0.286246	0.262749	1.08943	0.275965	0.999739	0.999739	707.351	942.04	672.512	1562.1	785.773	1425.26	1395.48	1130.94
Adam32	8.06737	-0.0660738	0.607873	-0.108697	0.913443	0.999739	0.999739	10.6502	8.90397	9.53304	3.49463	8.91798	3.81852	14.5666	4.65407
Adam33	2.25261	0.699188	1.09011	0.641391	0.521269	0.999739	0.999739	2.66255	1.78079	0.86664	1.74731	6.9362	2.86389	0	1.16352
Adam5	1.84364	-0.218107	1.29447	-0.168492	0.866197	0.999739	0.999739	1.77503	0.890397	4.3332	0.873657	3.96354	0	2.91332	0
Adam7	0.339475	-0.367954	2.6988	-0.13634	0.891553	0.999739	0.999739	0.887516	0	0	0.873657	0	0.954629	0	0
Adam8	63.1887	-0.679886	0.33571	-2.02522	0.042845	0.999739	0.999739	130.465	58.7662	45.0653	76.8818	51.5261	36.2759	43.6998	62.83
Adam9	981.486	0.0556567	0.123018	0.452426	0.650962	0.999739	0.999739	875.091	1007.93	881.372	1083.33	844.235	979.449	1150.76	1029.71
Adamts1	123.479	-0.0905971	0.21019	-0.431024	0.666451	0.999739	0.999739	111.827	107.738	123.929	165.995	89.1798	149.877	119.446	119.842
Adamts10	409.431	-0.0270101	0.188321	-0.143426	0.885954	0.999739	0.999739	475.709	389.103	359.655	427.218	344.828	299.754	425.345	553.834
Adamts12	29.6298	0.128115	0.366411	0.349649	0.726602	0.999739	0.999739	18.6378	37.3967	19.0661	37.5673	24.7722	21.0018	37.8731	40.7231
Adamts13	136.42	0.0782897	0.153835	0.508921	0.610807	0.999739	0.999739	157.09	124.656	120.463	127.554	130.797	132.693	157.319	140.786
Adamts14	5.83757	-0.382924	0.659069	-0.581007	0.561236	0.999739	0.999739	3.55007	4.45199	9.53304	8.73657	2.97266	6.6824	7.2833	3.49055
Adamts15	102.144	0.134857	0.18068	0.746385	0.455435	0.999739	0.999739	81.6515	87.2589	105.73	115.323	104.043	123.147	103.423	96.572
Adamts16	12.5493	-0.116356	0.476131	-0.244379	0.806938	0.999739	0.999739	7.10013	14.2464	17.3328	13.1049	9.90886	6.6824	14.5666	17.4528
Adamts17	50.1483	0.0365984	0.240533	0.152155	0.879064	0.999739	0.999739	55.9135	36.5063	50.2651	55.0404	39.6354	57.2777	55.3531	51.1948
Adamts18	23.9077	0.196503	0.344882	0.569769	0.568834	0.999739	0.999739	15.0878	28.4927	15.5995	29.7043	23.7813	23.8657	29.1332	25.5974
Adamts19	22.7134	-0.0231275	0.418764	-0.055228	0.955957	0.999739	0.999739	25.738	34.7255	10.3997	20.0941	18.8268	17.1833	34.9598	19.7798
Adamts2	131.221	0.576922	0.241434	2.38956	0.0168685	0.999739	0.999739	78.989	98.8341	78.8642	164.248	134.761	161.332	173.342	159.402
Adamts20	130.983	0.28608	0.202273	1.41432	0.157267	0.999739	0.999739	97.6268	128.217	92.7304	152.89	128.815	125.056	151.493	171.037
Adamts3	271.951	-0.0491119	0.309227	-0.158822	0.873809	0.999739	0.999739	204.129	221.709	189.794	490.122	163.496	265.387	294.245	346.728
Adamts4	493.439	0.13452	0.131342	1.0242	0.305741	0.999739	0.999739	463.284	556.498	473.185	388.777	456.799	544.139	509.831	554.998
Adamts5	22.8603	-0.0765359	0.343074	-0.223089	0.823466	0.999739	0.999739	20.4129	26.7119	15.5995	31.4517	20.8086	24.8204	17.4799	25.5974
Adamts6	52.9383	0.24505	0.261873	0.935759	0.349397	0.999739	0.999739	44.3758	48.0814	33.7989	67.2716	53.5079	48.6861	56.8097	70.9746
Adamts7	14.6774	-0.393055	0.427807	-0.918767	0.358218	0.999739	0.999739	11.5377	18.6983	16.4662	20.0941	18.8268	7.63703	10.1966	13.9622
Adamts8	21.7637	-0.375012	0.360159	-1.04124	0.297764	0.999739	0.999739	21.3004	25.8215	25.9992	26.2097	26.7539	23.8657	10.1966	13.9622
Adamts9	85.549	-0.0283811	0.254235	-0.111633	0.911114	0.999739	0.999739	68.3388	94.3821	71.9311	110.081	53.5079	82.0981	94.6829	109.371
Adamtsl1	84.5748	0.187922	0.347469	0.54083	0.588625	0.999739	0.999739	48.8134	63.2182	54.5983	149.395	62.4258	103.1	101.966	93.0814
Adamtsl2	75.8641	-0.155341	0.201271	-0.771801	0.440232	0.999739	0.999739	96.7393	70.3414	82.3308	70.7662	86.2071	67.7787	69.9197	62.83
Adamtsl3	53.7071	0.376443	0.305677	1.2315	0.218135	0.999739	0.999739	37.2757	42.7391	33.7989	73.3872	45.5808	83.0527	56.8097	57.0124
Adamtsl4	31.2749	-0.175152	0.319423	-0.548339	0.583459	0.999739	0.999739	47.9259	32.0543	30.3324	21.8414	24.7722	28.6389	37.8731	26.7609
Adamtsl5	48.1389	-0.0592086	0.270307	-0.219042	0.826617	0.999739	0.999739	59.4636	40.9583	51.9984	44.5565	33.6901	66.824	42.2431	45.3772
Adap1	4361.43	0.058146	0.0837709	0.694107	0.487615	0.999739	0.999739	4324.87	4417.26	4563.72	3789.92	4734.45	4408.48	4259.27	4393.44
Adap2	49.9499	0.0421644	0.245424	0.171802	0.863593	0.999739	0.999739	53.251	44.5199	37.2655	62.0296	46.5717	50.5953	43.6998	61.6664
Adar	3046.17	0.0304341	0.105883	0.287432	0.773782	0.999739	0.999739	2929.69	2863.52	2713.45	3548.79	2827.99	3264.83	3225.04	2996.06
Adarb1	3897.06	0.0337526	0.105488	0.319965	0.748995	0.999739	0.999739	3782.59	3847.41	3470.03	4303.63	3413.6	3849.06	4221.4	4288.73
Adarb2	115.805	0.284454	0.331278	0.858656	0.39053	0.999739	0.999739	78.1014	95.2725	59.7981	184.342	80.2618	142.24	128.186	158.238
Adat1	77.5283	-0.066513	0.204009	-0.326029	0.744402	0.999739	0.999739	69.2263	69.451	83.1974	94.355	68.3711	63.0055	83.0296	89.5909
Adat2	126.363	0.033762	0.180833	0.186703	0.851894	0.999739	0.999739	95.8518	120.204	137.796	146.774	136.742	144.149	110.706	118.679
Adat3	65.7358	0.265523	0.241405	1.09991	0.271372	0.999739	0.999739	58.5761	57.8758	54.5983	67.2716	70.3529	48.6861	68.463	100.063
Adck1	437.1	0.037429	0.101048	0.370407	0.71108	0.999739	0.999739	402.932	407.802	442.853	472.648	447.881	433.402	418.061	471.225
Adck5	349.286	-0.161318	0.119243	-1.35285	0.176105	0.999739	0.999739	402.932	327.666	389.121	354.705	329.965	295.935	326.292	367.672
Adcy1	23247.8	0.0812737	0.152551	0.532765	0.594196	0.999739	0.999739	21464.6	24264.2	18670.9	25971.2	19045.8	21525	25747.9	29292.7
Adcy10	14.0465	0.64259	0.432077	1.48721	0.136958	0.999739	0.999739	8.87516	10.6848	8.6664	15.7258	23.7813	11.4555	14.5666	18.6163
Adcy2	3839.03	0.0280821	0.0699371	0.401534	0.688027	0.999739	0.999739	3669.88	3905.28	3715.28	3916.6	4080.47	3878.66	3951.92	3594.11
Adcy3	1608.22	0.0710301	0.0870225	0.816226	0.414371	0.999739	0.999739	1477.71	1502.99	1540.89	1752.56	1577.49	1733.61	1697.01	1583.55
Adcy4	39.5061	-0.0918147	0.293403	-0.31293	0.754334	0.999739	0.999739	54.1385	30.2735	32.0657	47.1775	34.681	45.8222	27.6765	44.2137
Adcy5	2055.1	0.13724	0.124428	1.10297	0.270041	0.999739	0.999739	1927.69	1909.01	1780.08	2211.23	1703.33	2255.79	2351.05	2302.6
Adcy6	801.445	0.0941727	0.120842	0.779307	0.435799	0.999739	0.999739	767.702	771.084	647.38	913.845	769.919	789.478	866.712	885.437
Adcy7	49.2449	0.0764533	0.32693	0.233852	0.8151	0.999739	0.999739	49.7009	39.1775	32.9323	69.0189	32.6992	52.5046	77.203	40.7231
Adcy8	436.421	0.207556	0.201202	1.03158	0.302267	0.999739	0.999739	377.194	386.432	438.52	420.229	598.495	589.006	351.055	330.439
Adcy9	2496.8	-0.0765471	0.12107	-0.632253	0.527221	0.999739	0.999739	2476.17	2366.68	2330.39	3077.89	2084.82	2494.45	2480.69	2663.29
Adcyap1	433.21	0.116903	0.201993	0.578751	0.562758	0.999739	0.999739	413.583	429.171	453.253	368.683	641.103	486.861	332.118	340.911
Adcyap1r1	5042.54	-0.11892	0.149889	-0.79339	0.427551	0.999739	0.999739	5219.48	5129.58	4893.91	5754.78	4870.21	3769.83	6333.56	4369.01
Add1	8045.11	-0.0441243	0.0667531	-0.661007	0.508608	0.999739	0.999739	8237.04	7938.78	7924.55	8574.07	7621.9	8427.47	7657.66	7979.4
Add2	1426.01	0.122331	0.241761	0.506001	0.612856	0.999739	0.999739	1106.73	1349.84	904.772	2100.27	1029.53	1513.09	1673.7	1730.15
Add3	3810.08	0.0938829	0.111852	0.839352	0.401272	0.999739	0.999739	3300.67	4053.98	3303.63	4084.35	3495.85	3836.65	4285.49	4120.02
Adgb	19.31	-0.317722	0.374446	-0.848513	0.396152	0.999739	0.999739	28.4005	16.0271	24.2659	17.4731	18.8268	17.1833	10.1966	22.1068
Adgra1	1233.86	0.163527	0.1185	1.37997	0.167595	0.999739	0.999739	1066.79	1312.45	1059.03	1217	1149.43	1447.22	1421.7	1197.26
Adgra2	448.544	0.197097	0.149927	1.31462	0.188638	0.999739	0.999739	471.271	390.884	350.989	456.923	401.309	427.674	533.137	556.161
Adgra3	387.865	0.0450006	0.122197	0.368264	0.712676	0.999739	0.999739	370.094	396.227	353.589	404.503	341.856	365.623	460.304	410.722
Adgrb1	7589.02	0.0510754	0.102701	0.497322	0.618962	0.999739	0.999739	8557.43	6766.13	7189.64	7303.77	7332.56	7044.21	8013.08	8505.31
Adgrb2	11704.3	0.0363241	0.0980782	0.370359	0.711115	0.999739	0.999739	12910.7	10735.5	11532.4	11047.4	11284.2	10692.8	12219.9	13211.7
Adgrb3	2313.56	-0.00635766	0.11258	-0.0564722	0.954966	0.999739	0.999739	2145.13	2310.58	2043.54	2776.48	2273.09	2514.49	2222.86	2222.32
Adgrd1	42.8722	-0.0889757	0.264469	-0.336432	0.736545	0.999739	0.999739	39.9382	36.5063	49.3985	50.6721	27.7448	49.6407	43.6998	45.3772
Adgre1	184.666	-0.272981	0.143753	-1.89897	0.0575688	0.999739	0.999739	191.704	223.49	221.86	171.237	153.587	169.924	161.689	183.836
Adgre4	2.19238	-1.17864	1.07163	-1.09986	0.271395	0.999739	0.999739	1.77503	3.56159	1.73328	5.24194	0.990886	1.90926	0	2.32704
Adgre5	112.513	-0.311048	0.203637	-1.52746	0.126646	0.999739	0.999739	139.34	82.8069	144.729	131.922	95.1251	108.828	90.3129	107.044
Adgrf1	0.621003	-1.36372	2.31164	-0.589935	0.555235	0.999739	0.999739	0	0.890397	0	2.62097	0	0	1.45666	0
Adgrf2	3.7043	-0.614821	0.827793	-0.742724	0.457649	0.999739	0.999739	5.3251	4.45199	1.73328	6.1156	0.990886	2.86389	5.82664	2.32704
Adgrf3	0.587826	-1.37201	2.03805	-0.673195	0.500823	0.999739	0.999739	1.77503	0.890397	0	0.873657	0	0	0	1.16352
Adgrf4	0.256379	0.355472	3.44932	0.103056	0.917919	0.999739	0.999739	0.887516	0	0	0	0	0	0	1.16352
Adgrf5	348.986	0.115557	0.257061	0.449533	0.653047	0.999739	0.999739	315.956	317.872	235.726	470.027	206.104	463.95	423.888	358.363
Adgrg1	3792.83	0.0113828	0.0817088	0.13931	0.889205	0.999739	0.999739	4063.94	3532.2	3669.35	3843.22	3497.83	3780.33	4074.28	3881.49
Adgrg2	51.3695	0.00399254	0.225783	0.0176831	0.985892	0.999739	0.999739	50.5884	53.4238	51.1317	48.9248	40.6263	51.55	67.0063	47.7042
Adgrg3	0.997509	-2.36416	1.75605	-1.34629	0.178208	0.999739	0.999739	0	2.67119	1.73328	2.62097	0	0.954629	0	0
Adgrg5	0.811889	-0.196996	1.92706	-0.102226	0.918577	0.999739	0.999739	0.887516	2.67119	0	0	1.98177	0.954629	0	0
Adgrg6	256.271	0.258022	0.144389	1.78699	0.0739383	0.999739	0.999739	233.417	260.886	227.06	211.425	217.995	302.617	300.072	296.697
Adgrg7	0.656359	-0.163278	1.88439	-0.0866479	0.930951	0.999739	0.999739	0	0.890397	0.86664	0.873657	0	0	1.45666	1.16352
Adgrl1	6716.62	0.103809	0.132947	0.780834	0.4349	0.999739	0.999739	6298.7	6066.27	5603.69	7930.18	5783.8	6968.79	7463.92	7617.55
Adgrl3	1282.62	0.133559	0.149702	0.89217	0.372302	0.999739	0.999739	1144.9	1131.69	1058.17	1556.86	1091.96	1347.94	1519.3	1410.18
Adgrl4	230.088	0.211035	0.13053	1.61675	0.105932	0.999739	0.999739	236.079	194.107	202.794	221.035	224.931	273.024	225.782	262.955
Adgrv1	369.469	-0.0506205	0.181285	-0.279232	0.780067	0.999739	0.999739	410.033	420.267	415.12	258.602	441.935	303.572	352.512	353.709
Adh5	1195.85	-0.150214	0.0911488	-1.64801	0.0993504	0.999739	0.999739	1296.66	1206.49	1339.82	1190.79	1257.43	1128.37	1107.06	1040.18
Adh7	0.740148	2.28978	1.88862	1.21241	0.225355	0.999739	0.999739	0	0	0.86664	0	1.98177	1.90926	0	1.16352
Adhfe1	903.228	-0.103868	0.115546	-0.898932	0.368689	0.999739	0.999739	1088.98	902.863	954.17	796.775	862.071	916.444	913.326	791.192
Adi1	413.576	0.110856	0.11782	0.940887	0.346763	0.999739	0.999739	370.094	389.103	454.986	378.293	478.598	424.81	378.731	433.992
Adipoq	1.58672	0.420363	1.25194	0.335771	0.737044	0.999739	0.999739	0.887516	2.67119	0.86664	0.873657	0.990886	0	2.91332	3.49055
Adipor1	1951.14	-0.0381789	0.068534	-0.55708	0.577473	0.999739	0.999739	1964.96	1947.3	2090.33	1907.19	1956.01	2000.9	1876.18	1866.28
Adipor2	670.277	0.188081	0.145059	1.29658	0.194776	0.999739	0.999739	550.26	717.66	516.517	722.514	626.24	770.386	668.607	790.028
Adk	1618.15	0.00265092	0.095284	0.0278212	0.977805	0.999739	0.999739	1557.59	1835.11	1648.35	1425.81	1562.63	1669.65	1612.52	1633.58
Adm	18.6228	-0.123551	0.414746	-0.297896	0.765783	0.999739	0.999739	19.5254	12.4656	18.1994	27.957	12.8815	27.6842	11.6533	18.6163
Adnp	3178.64	-0.0015014	0.0839513	-0.0178842	0.985731	0.999739	0.999739	2955.43	3322.96	2933.58	3508.61	3085.62	3206.6	3235.24	3181.06
Adnp2	513.831	-0.0143905	0.0945455	-0.152207	0.879024	0.999739	0.999739	533.397	518.211	471.452	544.288	535.079	529.819	485.068	493.331
Ado	1143.4	0.0746439	0.0775426	0.962618	0.335739	0.999739	0.999739	1044.61	1124.57	1094.57	1192.54	1149.43	1209.51	1134.74	1197.26
Adora1	5399	-0.0282697	0.0566985	-0.498597	0.618063	0.999739	0.999739	5489.29	5285.4	5591.56	5439.39	5165.49	5306.78	5418.77	5495.29
Adora2a	58.5525	-0.0890053	0.227733	-0.390833	0.695921	0.999739	0.999739	65.6762	59.6566	66.7313	48.0511	53.5079	45.8222	74.2896	54.6853
Adora2b	140.285	-0.0499697	0.154386	-0.323666	0.746191	0.999739	0.999739	121.59	156.71	132.596	159.879	129.806	135.557	132.556	153.584
Adora3	60.8154	-0.0725853	0.219985	-0.329955	0.741434	0.999739	0.999739	70.1138	67.6702	57.1982	54.1667	60.4441	63.9601	69.9197	43.0502
Adpgk	1214.55	0.127602	0.153036	0.833804	0.404391	0.999739	0.999739	1079.22	1419.29	1292.16	852.689	1166.27	1274.43	1251.27	1381.1
Adprh	1157.41	0.000478174	0.0889947	0.00537307	0.995713	0.999739	0.999739	1235.42	1087.17	1209.83	1097.31	1267.34	1119.78	1140.56	1101.85
Adprhl1	77.4009	0.0771266	0.257128	0.299955	0.764212	0.999739	0.999739	79.8765	62.3278	80.5975	78.6291	63.4167	71.5972	58.2664	124.496
Adprm	298.396	-0.189604	0.122088	-1.55301	0.12042	0.999739	0.999739	321.281	297.393	330.19	325	326.992	267.296	243.262	275.754
Adprs	845.975	-0.0129142	0.113307	-0.113976	0.909257	0.999739	0.999739	915.029	856.562	909.105	718.146	935.397	767.522	860.886	805.154
Adra1a	98.2861	-0.0651704	0.572186	-0.113897	0.909319	0.999739	0.999739	62.1261	74.7933	50.2651	214.92	49.5443	142.24	83.0296	109.371
Adra1b	57.8522	0.280598	0.205258	1.36705	0.171609	0.999739	0.999739	54.1385	56.9854	52.865	45.4302	58.4623	70.6425	56.8097	67.484
Adra1d	975.737	-0.00618191	0.126276	-0.0489555	0.960955	0.999739	0.999739	1049.93	853	1000.1	1006.45	894.77	832.437	1008.01	1161.19
Adra2a	245.788	0.122655	0.115761	1.05955	0.289351	0.999739	0.999739	236.079	231.503	227.926	246.371	266.548	271.115	262.199	224.559
Adra2b	12.2742	0.0513619	0.492652	0.104256	0.916966	0.999739	0.999739	20.4129	12.4656	9.53304	6.1156	17.836	11.4555	8.73996	11.6352
Adra2c	523.227	0.112569	0.144215	0.780567	0.435057	0.999739	0.999739	601.736	511.978	501.784	395.767	515.261	513.59	512.744	632.954
Adrb1	316.278	0.13473	0.127932	1.05313	0.292281	0.999739	0.999739	306.193	280.475	316.323	304.033	393.382	291.162	300.072	338.584
Adrb2	32.4407	-0.18751	0.277728	-0.675158	0.499575	0.999739	0.999739	34.6131	30.2735	37.2655	35.8199	26.7539	36.2759	36.4165	22.1068
Adrb3	13.1745	0.319055	0.40804	0.781923	0.43426	0.999739	0.999739	13.3127	12.4656	9.53304	11.3575	12.8815	15.2741	18.9366	11.6352
Adrm1	1428.91	0.0384837	0.102701	0.374717	0.707871	0.999739	0.999739	1486.59	1295.53	1593.75	1264.18	1484.35	1402.35	1360.52	1543.99
Adsl	1539.51	-0.16554	0.0770802	-2.14763	0.0317428	0.999739	0.999739	1731.54	1504.77	1623.22	1651.21	1501.19	1383.26	1442.09	1478.83
Adss	1427.22	0.0509989	0.0693703	0.73517	0.462236	0.999739	0.999739	1349.02	1425.53	1430.82	1404.84	1488.31	1512.13	1408.59	1398.55
Adssl1	43.1372	0.149007	0.294231	0.506428	0.612556	0.999739	0.999739	47.9259	31.1639	52.865	32.3253	62.4258	46.7768	37.8731	33.742
Adtrp	57.5608	0.031173	0.221193	0.140931	0.887924	0.999739	0.999739	60.3511	57.8758	56.3316	54.1667	76.2982	58.2324	49.5264	47.7042
Aebp1	376.811	-0.0679138	0.155677	-0.436249	0.662656	0.999739	0.999739	468.609	414.035	366.589	293.549	395.364	326.483	355.425	394.432
Aebp2	746.646	0.0378563	0.0968656	0.390812	0.695936	0.999739	0.999739	654.1	743.482	735.777	814.248	723.347	771.34	732.7	798.173
Aen	143.489	-0.0353938	0.18625	-0.190034	0.849283	0.999739	0.999739	127.802	142.464	171.595	139.785	188.268	121.238	131.099	125.66
Afap1	744.832	-0.0513223	0.142857	-0.359258	0.719402	0.999739	0.999739	715.338	780.878	634.38	900.74	593.541	745.565	757.463	830.752
Afap1l1	171.411	0.0942551	0.171411	0.549878	0.582403	0.999739	0.999739	193.479	194.107	130.863	145.901	193.223	180.425	152.949	180.345
Afap1l2	273.77	-0.0370796	0.162715	-0.227881	0.819739	0.999739	0.999739	307.968	262.667	257.392	280.444	216.013	252.977	257.829	354.873
Afdn	1505.97	0.159258	0.150468	1.05842	0.289866	0.999739	0.999739	1265.6	1394.36	1175.16	1855.65	1366.43	1607.6	1708.66	1674.3
Aff1	153.394	0.243593	0.308294	0.790133	0.42945	0.999739	0.999739	102.952	161.162	82.3308	214.92	97.1068	172.788	192.279	203.616
Aff1-as1	6.24098	-0.138314	0.615241	-0.224812	0.822125	0.999739	0.999739	5.3251	8.01357	6.06648	6.98926	10.8997	4.77315	4.36998	3.49055
Aff2	161.296	0.187176	0.306598	0.610493	0.541535	0.999739	0.999739	97.6268	161.162	96.197	248.119	111.97	209.064	195.192	171.037
Aff3	569.052	0.238856	0.204093	1.17033	0.241867	0.999739	0.999739	454.408	512.869	418.587	701.547	413.2	657.739	671.52	722.544
Aff4	3410.81	0.256129	0.166887	1.53475	0.124846	0.999739	0.999739	2608.41	3305.15	2492.46	4028.43	2954.82	3912.07	4075.73	3909.42
Afg3l1	509.423	-0.176827	0.109859	-1.60958	0.10749	0.999739	0.999739	576.886	487.938	605.781	490.995	491.48	457.267	499.634	465.407
Afg3l2	1585.45	-0.0655146	0.0878862	-0.745449	0.456	0.999739	0.999739	1554.04	1665.93	1521.82	1745.57	1708.29	1523.59	1501.82	1462.54
Afm	0.711686	-0.644068	1.81387	-0.35508	0.72253	0.999739	0.999739	1.77503	0.890397	0	0.873657	0.990886	0	0	1.16352
Afmid	168.397	-0.122001	0.148114	-0.823696	0.410112	0.999739	0.999739	186.378	176.299	194.127	145.901	181.332	160.378	157.319	145.44
Afp	5.25291	-0.331859	0.824687	-0.402406	0.687385	0.999739	0.999739	2.66255	8.90397	6.93312	4.36829	2.97266	1.90926	13.1099	1.16352
Aftph	2004.95	0.0865534	0.0828515	1.04468	0.29617	0.999739	0.999739	1847.81	1929.49	1827.74	2174.53	2008.53	2096.37	2024.76	2130.4
Aga	531.747	-0.04722	0.0854853	-0.552376	0.580691	0.999739	0.999739	537.835	553.827	557.249	513.71	546.969	513.59	508.374	522.419
Agap1	1523.42	0.27153	0.203876	1.33184	0.182913	0.999739	0.999739	1240.75	1559.09	983.636	1737.7	1117.72	1818.57	1848.5	1881.41
Agap2	25175.1	0.0110214	0.107479	0.102545	0.918324	0.999739	0.999739	26036.2	24415.6	26252.2	23608.8	22949.9	21898.2	27331.3	28908.8
Agap3	7780.36	0.026288	0.0978153	0.268752	0.788121	0.999739	0.999739	8616.01	7073.31	8084.01	7063.52	7399.94	7499.57	7855.77	8650.75
Agbl1	7.88791	0.262329	0.535268	0.490089	0.624071	0.999739	0.999739	5.3251	8.01357	6.06648	9.61023	9.90886	10.5009	4.36998	9.30814
Agbl2	38.7145	-0.167977	0.299883	-0.560143	0.575382	0.999739	0.999739	44.3758	45.4102	32.0657	42.8092	30.7175	43.9129	20.3932	50.0313
Agbl3	109.223	0.0507548	0.202791	0.250282	0.802369	0.999739	0.999739	106.502	124.656	111.797	84.7447	100.08	84.0074	134.013	127.987
Agbl5	214.596	-0.0559688	0.136944	-0.408698	0.682761	0.999739	0.999739	236.967	227.942	191.527	218.414	178.36	233.884	215.586	214.087
Ager	72.5926	-0.282198	0.280616	-1.00564	0.31459	0.999739	0.999739	92.3017	74.7933	71.0644	79.5028	40.6263	48.6861	71.3763	102.39
Agfg1	1431.75	0.154752	0.104224	1.48481	0.137594	0.999739	0.999739	1294	1298.2	1235.83	1591.8	1391.2	1560.82	1509.1	1573.08
Agfg2	1104.36	0.00943007	0.0817355	0.115373	0.908149	0.999739	0.999739	1147.56	1071.15	1133.56	1051.01	1164.29	1118.83	1136.19	1012.26
Aggf1	1235.12	-0.0700341	0.0717688	-0.97583	0.329149	0.999739	0.999739	1287.79	1278.61	1270.49	1223.12	1267.34	1138.87	1210.48	1204.24
Agk	621.919	0.0447382	0.104647	0.427516	0.669003	0.999739	0.999739	547.598	601.018	661.246	641.264	654.976	691.151	587.034	591.067
Agl	1130	0.0429906	0.133162	0.322844	0.746813	0.999739	0.999739	1048.16	1146.83	1010.5	1245.83	891.798	1271.57	1268.75	1156.54
Agmat	6.75064	0.719275	0.649134	1.10805	0.267839	0.999739	0.999739	4.43758	2.67119	7.79976	5.24194	10.8997	2.86389	13.1099	6.98111
Agmo	69.8067	-0.122026	0.242431	-0.503343	0.614723	0.999739	0.999739	62.1261	90.8205	83.1974	55.0404	76.2982	71.5972	72.833	46.5407
Ago1	1854.45	0.0705328	0.133257	0.529298	0.596599	0.999739	0.999739	1693.38	1667.71	1596.35	2277.62	1681.53	1828.11	2040.78	2050.12
Ago2	164.082	0.474332	0.337261	1.40643	0.159598	0.999739	0.999739	91.4142	119.313	87.5306	250.74	108.997	208.109	218.499	228.049
Ago3	88.7492	0.413785	0.431537	0.958865	0.337627	0.999739	0.999739	41.7133	73.903	37.2655	151.143	46.5717	101.191	126.729	131.477
Ago4	86.6841	0.123503	0.2609	0.473374	0.635946	0.999739	0.999739	64.7887	85.4781	62.3981	118.817	61.4349	97.3722	96.1395	107.044
Agpat1	4340.69	0.0125517	0.086642	0.144869	0.884814	0.999739	0.999739	4581.36	4082.47	4713.65	3910.49	4588.79	4358.84	4323.37	4166.56
Agpat2	6.241	-0.210548	0.662074	-0.318013	0.750475	0.999739	0.999739	8.87516	9.79437	4.3332	3.49463	1.98177	5.72777	8.73996	6.98111
Agpat3	6247.06	-0.00985894	0.0553003	-0.17828	0.858503	0.999739	0.999739	6217.94	6239.01	6154.01	6461.57	5992.88	6342.56	6308.79	6259.72
Agpat4	1756.97	0.0186015	0.0742341	0.250579	0.80214	0.999739	0.999739	1814.97	1859.15	1673.48	1635.49	1807.38	1757.47	1762.56	1745.28
Agpat5	1082.62	-0.071684	0.0953083	-0.752127	0.451974	0.999739	0.999739	1009.11	1167.31	1033.03	1229.24	1012.69	1102.6	1022.58	1084.4
Agps	220.565	0.386723	0.291181	1.32812	0.184138	0.999739	0.999739	141.115	240.407	108.33	274.328	156.56	268.251	298.615	276.917
Agr2	1.35037	-0.046016	1.55925	-0.0295116	0.976457	0.999739	0.999739	2.66255	0	1.73328	0.873657	0	0	4.36998	1.16352
Agrn	1892.79	0.0291892	0.1468	0.198836	0.842391	0.999739	0.999739	1855.8	1602.71	1592.02	2442.75	1733.06	1849.12	2106.33	1960.53
Agrp	11.2981	0.0787542	0.448017	0.175784	0.860464	0.999739	0.999739	14.2003	9.79437	9.53304	10.4839	13.8724	12.4102	13.1099	6.98111
Agt	3105.7	0.101332	0.086944	1.16548	0.243824	0.999739	0.999739	3193.28	2778.04	3099.97	2912.77	3284.79	2892.53	3462.48	3221.78
Agtpbp1	4967.3	-0.0140665	0.0921729	-0.15261	0.878706	0.999739	0.999739	4710.94	4911.43	4670.32	5673.53	4590.78	5326.83	4952.64	4901.9
Agtr1a	7.95178	-0.176673	0.584015	-0.302515	0.76226	0.999739	0.999739	7.98765	7.12318	5.19984	13.1049	2.97266	8.59166	11.6533	6.98111
Agtr1b	0.980627	0.307541	1.82493	0.168523	0.866172	0.999739	0.999739	2.66255	0	0	0.873657	1.98177	0	0	2.32704
Agtr2	1.98874	0.335554	1.14395	0.293329	0.769271	0.999739	0.999739	3.55007	0	2.59992	0.873657	0.990886	3.81852	2.91332	1.16352
Agtrap	371.836	0.0081891	0.10275	0.079699	0.936477	0.999739	0.999739	386.957	361.501	349.256	386.156	365.637	370.396	345.228	409.558
Agxt2	0.338958	-0.363807	2.69932	-0.134778	0.892788	0.999739	0.999739	0	0.890397	0.86664	0	0	0.954629	0	0
Ahctf1	744.429	0.105454	0.141659	0.744424	0.45662	0.999739	0.999739	665.637	792.453	573.715	836.09	673.803	740.792	808.446	864.494
Ahcy	961.364	-0.0809487	0.0990612	-0.817158	0.413838	0.999739	0.999739	947.868	903.753	1094.57	1009.07	1024.58	953.674	875.452	881.946
Ahcyl1	8251.55	0.0101639	0.0572949	0.177395	0.859198	0.999739	0.999739	8074.62	8348.36	7965.28	8501.56	7982.58	8478.06	8269.46	8392.45
Ahcyl2	2916.36	0.0111597	0.109075	0.102313	0.918508	0.999739	0.999739	2820.53	2970.36	2612.92	3213.31	2759.62	2565.09	3319.73	3069.36
Ahdc1	1182.48	0.107601	0.0950394	1.13217	0.257562	0.999739	0.999739	1189.27	1145.05	998.369	1220.5	1127.63	1260.11	1230.88	1288.01
Ahi1	1975.02	-0.00640193	0.169696	-0.037726	0.969906	0.999739	0.999739	1792.78	1841.34	1563.42	2718.82	1675.59	1936.94	2225.78	2045.46
Ahnak	255.702	-0.10466	0.132958	-0.787169	0.431183	0.999739	0.999739	291.993	285.817	240.926	240.256	216.013	263.478	270.939	236.194
Ahr	148.448	-0.0661275	0.183417	-0.360532	0.71845	0.999739	0.999739	117.152	161.162	133.463	194.826	132.779	142.24	161.689	144.276
Ahrr	1.04155	0.423415	1.65218	0.256276	0.797737	0.999739	0.999739	0	0	2.59992	0.873657	0.990886	0.954629	2.91332	0
Ahsa1	3143.24	-0.066962	0.0889989	-0.752391	0.451816	0.999739	0.999739	3431.14	3157.35	3385.96	2891.8	3367.03	3026.17	2973.04	2913.45
Ahsa2	445.299	0.00459496	0.12679	0.0362407	0.97109	0.999739	0.999739	495.234	395.336	429.853	457.796	422.118	414.309	413.691	534.055
Ahsp	4.53845	-0.357339	0.69703	-0.512659	0.60819	0.999739	0.999739	6.21261	2.67119	5.19984	6.1156	2.97266	3.81852	5.82664	3.49055
AI467606	22.3439	-0.00455526	0.357547	-0.0127403	0.989835	0.999739	0.999739	17.7503	25.8215	28.5991	17.4731	16.8451	31.5028	23.3066	17.4528
AI593442	5250.19	0.037529	0.0877263	0.427796	0.6688	0.999739	0.999739	4805.01	5212.38	5270.04	5442.88	5899.74	5472.89	5015.28	4883.28
Aicda	0.243189	1.73991	3.50254	0.496756	0.619361	0.999739	0.999739	0	0	0	0	0.990886	0.954629	0	0
Aida	1007.9	-0.0316468	0.092016	-0.343927	0.730901	0.999739	0.999739	949.643	1099.64	1048.63	978.496	1069.17	1002.36	1012.38	902.89
Aif1	400.179	-0.36825	0.171658	-2.14525	0.031933	0.999739	0.999739	463.284	487.047	542.516	311.896	368.61	384.715	335.032	308.332
Aif1l	242.892	0.0841779	0.144711	0.581696	0.560771	0.999739	0.999739	261.817	252.873	246.992	180.847	241.776	234.839	262.199	261.791
Aifm1	599.859	-0.115028	0.0981443	-1.17203	0.241187	0.999739	0.999739	663.862	638.415	608.381	586.224	635.158	587.097	554.987	524.746
Aifm2	212.249	0.0995516	0.12677	0.785292	0.432283	0.999739	0.999739	195.254	197.668	216.66	208.804	192.232	212.882	230.152	244.339
Aifm3	895.966	-0.00560326	0.109097	-0.0513601	0.959039	0.999739	0.999739	957.63	958.958	852.773	822.111	842.253	883.032	814.273	1036.69
Aig1	1360	-0.0628079	0.0800678	-0.784435	0.432785	0.999739	0.999739	1291.34	1399.7	1445.55	1423.19	1436.78	1313.57	1299.34	1270.56
Aim2	23.4872	-0.226957	0.489171	-0.463962	0.642675	0.999739	0.999739	41.7133	30.2735	18.1994	10.4839	10.8997	21.0018	37.8731	17.4528
Aimp1	762.139	-0.256664	0.158776	-1.61652	0.105981	0.999739	0.999739	857.341	895.739	903.905	663.979	818.472	788.524	629.277	539.872
Aimp2	502.83	-0.0654171	0.122965	-0.531996	0.594729	0.999739	0.999739	558.248	455.883	557.249	486.627	574.714	473.496	471.958	444.464
Aip	973.724	-0.00278709	0.130214	-0.021404	0.982923	0.999739	0.999739	1045.49	981.218	1073.77	799.396	1150.42	945.083	926.436	867.984
Aire	1.35662	0.48016	1.75731	0.273235	0.784672	0.999739	0.999739	0.887516	3.56159	0	0	0	0	2.91332	3.49055
Ajap1	914.869	-0.0414168	0.0876881	-0.472319	0.636699	0.999739	0.999739	960.293	842.316	905.638	1004.71	892.788	921.217	862.342	929.651
Ajm1	4058.98	0.011222	0.100619	0.111529	0.911197	0.999739	0.999739	4331.97	3892.82	4101.81	3844.96	3923.91	3629.5	3998.53	4748.32
Ajuba	42.6006	0.0837652	0.257985	0.32469	0.745416	0.999739	0.999739	48.8134	40.0679	44.1986	33.199	43.599	57.2777	36.4165	37.2326
Ak2	242.058	-0.0726516	0.131996	-0.550406	0.582041	0.999739	0.999739	278.68	241.298	254.792	218.414	249.703	217.655	214.129	261.791
Ak3	712.333	-0.1344	0.141602	-0.949138	0.34255	0.999739	0.999739	826.278	804.919	773.909	577.487	795.682	641.511	671.52	607.356
Ak4	1817.28	0.192301	0.140888	1.36492	0.172277	0.999739	0.999739	1568.24	1644.56	1537.42	2033	1603.25	1745.06	2182.08	2224.65
Ak5	5268.29	-0.10154	0.0781452	-1.29937	0.193817	0.999739	0.999739	5177.77	5150.06	5398.3	6088.52	5231.88	5035.67	5075	4989.16
Ak7	97.6335	-0.368064	0.239415	-1.53735	0.124208	0.999739	0.999739	138.453	121.984	110.93	69.0189	98.0977	89.7351	88.8562	63.9935
Ak8	24.659	0.0033447	0.345635	0.00967699	0.992279	0.999739	0.999739	16.8628	31.1639	25.1325	26.2097	29.7266	31.5028	14.5666	22.1068
Ak9	43.0984	-0.222692	0.249472	-0.892655	0.372042	0.999739	0.999739	49.7009	53.4238	45.9319	35.8199	35.6719	33.412	46.6131	44.2137
Akain1	68.3645	0.254527	0.236902	1.0744	0.282644	0.999739	0.999739	45.2633	58.7662	68.4645	77.7555	72.3347	87.8259	53.8964	82.6098
Akap1	899.475	0.00258441	0.102608	0.0251872	0.979906	0.999739	0.999739	872.429	870.808	825.041	1024.8	814.508	895.442	946.829	945.94
Akap10	353.896	0.24862	0.147106	1.69007	0.0910137	0.999739	0.999739	291.993	349.036	269.525	382.662	321.047	407.627	407.865	401.414
Akap11	4399.86	0.247906	0.110727	2.2389	0.0251621	0.999739	0.999739	3542.08	4616.71	3632.09	4299.27	4318.28	4989.85	5072.09	4728.54
Akap12	708.96	0.381111	0.111786	3.4093	0.000651301	0.930663	0.930663	582.211	670.469	610.981	598.455	668.848	860.121	869.626	810.972
Akap13	678.199	0.0502543	0.238545	0.21067	0.833145	0.999739	0.999739	629.249	613.484	474.052	947.918	424.099	702.607	766.203	867.984
Akap14	8.78961	-0.196849	0.518795	-0.379435	0.704365	0.999739	0.999739	9.76268	6.23278	13.8662	7.86291	10.8997	8.59166	7.2833	5.81759
Akap17a	977.586	0.160335	0.166888	0.960735	0.336685	0.999739	0.999739	1049.04	861.904	996.636	784.544	1025.57	748.429	1056.08	1298.49
Akap17b	387.919	0.00404174	0.100194	0.0403392	0.967823	0.999739	0.999739	390.507	408.692	355.322	394.019	386.446	387.579	416.605	364.181
Akap2	2084.42	0.130087	0.158925	0.818541	0.413048	0.999739	0.999739	1764.38	1995.38	1618.02	2584.28	1846.02	2552.68	2238.89	2075.72
Akap3	21.7948	-0.169019	0.321312	-0.526027	0.598869	0.999739	0.999739	26.6255	17.8079	22.5326	25.3361	22.7904	19.0926	20.3932	19.7798
Akap5	1972.99	0.0674422	0.111905	0.602675	0.546725	0.999739	0.999739	1673.86	2055.93	1813.01	2164.92	1894.57	2247.2	2078.65	1855.81
Akap6	2202.07	0.176194	0.260286	0.676926	0.498453	0.999739	0.999739	1539.84	2003.39	1375.36	3352.22	1567.58	2850.52	2521.48	2406.15
Akap7	939.62	0.0315654	0.102397	0.308264	0.757882	0.999739	0.999739	918.579	969.642	866.64	962.77	1075.11	831.482	923.522	969.21
Akap8	1101.84	-0.12936	0.112746	-1.14736	0.251235	0.999739	0.999739	1139.57	1109.43	1010.5	1344.56	1044.39	960.357	1045.88	1160.03
Akap8l	1947.25	-0.166821	0.135798	-1.22845	0.219277	0.999739	0.999739	2293.34	1809.29	1832.08	2302.96	1760.8	1550.32	1832.48	2196.72
Akap9	1021.29	0.213503	0.104315	2.04671	0.0406863	0.999739	0.999739	904.379	1076.49	883.972	919.087	984.941	1205.7	1076.47	1119.3
Akip1	149.66	-0.101543	0.186335	-0.54495	0.585788	0.999739	0.999739	181.053	141.573	174.195	122.312	155.569	111.692	145.666	165.22
Akirin1	1928.09	-0.0552693	0.0781174	-0.707516	0.479246	0.999739	0.999739	1798.11	2007.85	1937.81	2117.74	1949.07	1899.71	1817.91	1896.53
Akirin2	1197.56	-0.0132236	0.082361	-0.160557	0.872442	0.999739	0.999739	1092.53	1180.67	1261.83	1278.16	1188.07	1231.47	1155.13	1192.61
Akna	184.006	-0.0533664	0.162346	-0.328721	0.742367	0.999739	0.999739	193.479	177.189	186.328	190.457	133.77	179.47	222.869	188.49
Aknad1	2.84701	0.447758	0.909088	0.492535	0.622341	0.999739	0.999739	1.77503	2.67119	0.86664	4.36829	5.94532	1.90926	2.91332	2.32704
Akp3	0.264768	1.79281	3.4031	0.526816	0.598321	0.999739	0.999739	0	0	0	0	0	0.954629	0	1.16352
Akr1a1	9048.67	-0.0450618	0.107272	-0.42007	0.674434	0.999739	0.999739	9339.33	8829.18	10358.1	8235.09	10233.9	8873.28	8434.06	8086.45
Akr1b1	1294.26	0.0424633	0.124375	0.341415	0.732791	0.999739	0.999739	1354.35	1262.58	1421.29	1063.24	1478.4	1324.07	1334.3	1115.81
Akr1b10	215.111	0.183819	0.155764	1.18012	0.237953	0.999739	0.999739	233.417	197.668	211.46	161.627	207.095	220.519	273.852	215.251
Akr1b1-ps2	0.601107	-0.226524	2.08498	-0.108646	0.913483	0.999739	0.999739	0	1.78079	0	0.873657	0.990886	0	0	1.16352
Akr1b7	4.42313	-2.15661	0.929525	-2.32012	0.0203344	0.999739	0.999739	8.87516	11.5752	6.93312	1.74731	2.97266	0.954629	0	2.32704
Akr1b8	4.09785	-0.300498	0.825635	-0.363959	0.715888	0.999739	0.999739	7.10013	3.56159	4.3332	2.62097	1.98177	0.954629	8.73996	3.49055
Akr1c12	4.34862	0.133934	0.780762	0.171543	0.863797	0.999739	0.999739	6.21261	5.34238	2.59992	2.62097	9.90886	2.86389	2.91332	2.32704
Akr1c13	13.1437	0.227868	0.453335	0.502648	0.615212	0.999739	0.999739	11.5377	17.8079	12.9996	6.1156	11.8906	13.3648	11.6533	19.7798
Akr1c14	17.5301	-0.152355	0.361275	-0.421713	0.673234	0.999739	0.999739	14.2003	24.0407	19.9327	15.7258	16.8451	17.1833	16.0233	16.2892
Akr1c15	103.412	-0.152524	0.240647	-0.633806	0.526208	0.999739	0.999739	81.6515	120.204	156.862	76.8818	107.016	95.4629	96.1395	93.0814
Akr1c19	89.9051	-0.27462	0.239629	-1.14602	0.251786	0.999739	0.999739	96.7393	122.875	102.263	72.5135	65.3985	113.601	77.203	68.6475
Akr1c2	0.583794	0.482874	2.4396	0.197932	0.843098	0.999739	0.999739	0	0.890397	0.86664	0	0	0	2.91332	0
Akr1e2	435.348	-0.196181	0.117342	-1.67188	0.0945477	0.999739	0.999739	496.122	447.87	509.584	406.251	449.862	368.487	396.211	408.395
Akr7a2	516.095	-0.0348729	0.13629	-0.255872	0.79805	0.999739	0.999739	570.673	478.143	611.848	429.839	560.842	500.226	455.934	521.256
Akr7a3	110.384	-0.0566819	0.231284	-0.245075	0.806398	0.999739	0.999739	111.827	139.792	131.729	67.2716	120.888	113.601	104.879	93.0814
Akt1	4009.62	-0.0381218	0.0775031	-0.491875	0.622808	0.999739	0.999739	4209.49	3952.47	4319.33	3768.08	4162.71	3720.19	4059.71	3884.99
Akt1s1	1096.36	0.00427544	0.0984873	0.0434111	0.965374	0.999739	0.999739	1171.52	1064.91	1168.23	974.128	1157.36	1001.41	1072.1	1161.19
Akt2	1427.16	-0.0797825	0.107609	-0.741414	0.458443	0.999739	0.999739	1643.68	1452.24	1455.09	1313.11	1278.24	1262.02	1482.88	1530.03
Akt3	3584.28	0.119129	0.137852	0.864178	0.38749	0.999739	0.999739	3123.17	3638.16	2903.24	4080.85	3056.88	4143.09	3692.63	4036.24
Aktip	2101.56	0.0570928	0.0739496	0.77205	0.440085	0.999739	0.999739	1995.14	2157.43	2138.87	1950	2243.37	2185.15	2112.16	2030.34
Alad	521.215	-0.0635004	0.117902	-0.538587	0.590172	0.999739	0.999739	571.561	469.239	613.581	477.017	538.051	504.999	487.981	507.294
Alas1	958.184	-0.114968	0.0914909	-1.2566	0.208897	0.999739	0.999739	1049.04	919.78	1071.17	946.171	951.251	957.493	923.522	847.041
Alas2	56.738	-0.475708	0.276744	-1.71894	0.0856247	0.999739	0.999739	88.7516	62.3278	64.1313	49.7985	43.599	68.7333	39.3298	37.2326
Alb	90.3799	-0.600857	0.327455	-1.83493	0.0665164	0.999739	0.999739	149.99	55.2046	135.196	95.2286	63.4167	93.5536	87.3996	43.0502
Albfm1	30.1727	-0.671802	0.429637	-1.56365	0.1179	0.999739	0.999739	25.738	30.2735	35.5322	55.9141	8.91798	17.1833	30.5899	37.2326
Alcam	3973.06	0.0325224	0.0970543	0.335095	0.737554	0.999739	0.999739	3571.37	3940.01	3632.09	4569.23	4014.08	4072.45	4157.31	3827.97
Aldh16a1	354.039	-0.0392424	0.128644	-0.305046	0.760331	0.999739	0.999739	355.894	300.954	405.587	373.052	386.446	314.073	337.945	358.363
Aldh18a1	695.756	0.0618347	0.0892135	0.693109	0.488241	0.999739	0.999739	707.351	636.634	650.846	730.377	736.228	734.11	670.063	700.438
Aldh1a1	604.734	0.308125	0.191482	1.60916	0.107581	0.999739	0.999739	517.422	518.211	452.386	674.463	938.369	540.32	575.381	621.318
Aldh1a2	65.0475	-0.0367064	0.278405	-0.131845	0.895107	0.999739	0.999739	49.7009	87.2589	66.7313	59.4087	46.5717	54.4139	59.723	96.572
Aldh1a3	2.39851	1.09483	0.956162	1.14503	0.252197	0.999739	0.999739	0.887516	2.67119	1.73328	0.873657	3.96354	3.81852	2.91332	2.32704
Aldh1a7	18.3726	-1.25166	0.503982	-2.48355	0.013008	0.999739	0.999739	21.3004	17.8079	49.3985	14.8522	8.91798	14.3194	14.5666	5.81759
Aldh1b1	299.115	-0.049985	0.119347	-0.41882	0.675348	0.999739	0.999739	339.919	282.256	301.591	291.801	300.239	273.024	330.662	273.427
Aldh1l1	515.9	-0.113828	0.0957453	-1.18887	0.234492	0.999739	0.999739	590.198	519.101	535.583	500.605	473.644	521.227	486.524	500.313
Aldh1l2	14.664	-0.238061	0.407298	-0.584488	0.558892	0.999739	0.999739	18.6378	10.6848	16.4662	17.4731	16.8451	9.54629	16.0233	11.6352
Aldh3a1	8.21204	-0.102262	0.581078	-0.175987	0.860304	0.999739	0.999739	8.87516	10.6848	6.93312	6.98926	7.92709	4.77315	16.0233	3.49055
Aldh3a2	1208.78	0.0182845	0.0677165	0.270016	0.787148	0.999739	0.999739	1234.54	1183.34	1209.83	1178.56	1236.63	1252.47	1185.72	1189.12
Aldh3b1	599.649	-0.158096	0.185327	-0.853065	0.393623	0.999739	0.999739	769.477	567.183	712.378	480.511	708.484	446.766	607.427	504.967
Aldh3b2	277.372	-0.274759	0.129335	-2.12439	0.0336372	0.999739	0.999739	343.469	282.256	290.324	297.917	278.439	214.792	265.112	246.666
Aldh4a1	1014.71	0.007287	0.0762781	0.0955321	0.923892	0.999739	0.999739	991.356	1045.33	957.637	1054.5	994.85	1014.77	993.442	1065.78
Aldh5a1	3307.88	0.0549704	0.113009	0.486427	0.626665	0.999739	0.999739	2940.34	3304.26	2917.98	3815.26	2994.46	3424.25	3656.22	3410.27
Aldh6a1	2032.97	0.0425336	0.0679661	0.625806	0.531442	0.999739	0.999739	2059.93	2026.54	1898.81	2026.88	2164.1	1984.67	2065.54	2037.32
Aldh7a1	1047.3	-0.0989504	0.0789365	-1.25355	0.210007	0.999739	0.999739	1144.01	1046.22	1088.5	1056.25	1067.18	1041.5	975.962	958.739
Aldh8a1	2.90577	0.962217	1.06386	0.904463	0.36575	0.999739	0.999739	1.77503	1.78079	0.86664	3.49463	0	5.72777	1.45666	8.14462
Aldh9a1	1121.5	-0.101014	0.10036	-1.00652	0.314167	0.999739	0.999739	1267.37	1225.19	1080.7	1071.98	1201.94	1088.28	1008.01	1028.55
Aldoart2	4.8465	1.4368	0.734072	1.9573	0.050312	0.999739	0.999739	1.77503	0.890397	3.46656	4.36829	10.8997	5.72777	5.82664	5.81759
Aldob	9.43317	-0.197924	0.481572	-0.410996	0.681075	0.999739	0.999739	12.4252	9.79437	10.3997	7.86291	6.9362	11.4555	7.2833	9.30814
Aldoc	20016.8	-0.0933148	0.11228	-0.831092	0.405922	0.999739	0.999739	22029	21556.5	22625.4	16445.7	20809.6	19121.2	18804	18743.1
Alg1	300.304	-0.121158	0.116502	-1.03996	0.298356	0.999739	0.999739	331.044	269.79	339.723	311.896	292.311	301.663	276.765	279.244
Alg10	152.085	0.40741	0.334639	1.21746	0.22343	0.999739	0.999739	70.1138	144.244	82.3308	226.277	117.915	198.563	163.146	214.087
Alg11	526.829	0.113947	0.127189	0.895885	0.370314	0.999739	0.999739	465.059	563.621	428.12	567.003	483.552	580.414	557.901	568.96
Alg12	236.142	-0.00623461	0.113414	-0.0549724	0.95616	0.999739	0.999739	251.167	244.859	227.06	223.656	248.712	225.292	234.522	233.867
Alg14	316.527	-0.0532098	0.135869	-0.391626	0.695334	0.999739	0.999739	294.655	352.597	349.256	295.296	352.755	322.665	252.002	312.986
Alg2	3543.69	0.0327137	0.0811791	0.402982	0.686962	0.999739	0.999739	3322.86	3383.51	3437.96	3870.3	3424.5	3841.43	3570.27	3498.7
Alg3	475.668	-0.0349852	0.10328	-0.338743	0.734804	0.999739	0.999739	487.246	430.062	539.05	469.154	471.662	479.224	482.154	446.791
Alg5	351.419	-0.130311	0.12131	-1.0742	0.282732	0.999739	0.999739	354.119	393.555	400.388	323.253	358.701	356.077	291.332	333.93
Alg6	175.44	0.0764998	0.163088	0.46907	0.639019	0.999739	0.999739	140.228	191.435	155.995	196.573	200.159	195.699	167.516	155.911
Alg8	112.268	-0.00373036	0.16624	-0.0224396	0.982097	0.999739	0.999739	117.152	96.1629	116.13	121.438	120.888	126.966	100.51	98.899
Alg9	410.407	0.0094425	0.106185	0.0889246	0.929142	0.999739	0.999739	395.832	376.638	415.12	449.06	445.899	408.581	415.148	376.98
Alk	115.109	0.0402027	0.238647	0.168461	0.866221	0.999739	0.999739	98.5143	113.971	80.5975	160.753	86.2071	137.467	122.359	121.006
Alkal2	65.7813	0.0914085	0.227504	0.401788	0.68784	0.999739	0.999739	55.9135	64.1086	57.1982	78.6291	66.3894	78.2796	46.6131	79.1192
Alkbh1	387.777	-0.125381	0.121512	-1.03184	0.302145	0.999739	0.999739	358.557	403.35	383.055	472.648	361.673	343.666	374.362	404.904
Alkbh2	151.294	-0.0502359	0.173215	-0.29002	0.771801	0.999739	0.999739	166.853	150.477	181.128	117.944	140.706	157.514	128.186	167.547
Alkbh3	454.227	-0.0421966	0.130416	-0.323553	0.746277	0.999739	0.999739	465.946	442.527	547.716	388.777	491.48	463.95	406.408	427.011
Alkbh4	146.359	-0.0199911	0.145381	-0.137508	0.890629	0.999739	0.999739	157.09	132.669	165.528	134.543	157.551	139.376	139.839	144.276
Alkbh5	343.387	0.147098	0.135224	1.08781	0.276678	0.999739	0.999739	292.88	363.282	271.258	376.546	342.847	381.852	349.598	368.835
Alkbh6	411.098	0.00754752	0.11426	0.0660556	0.947334	0.999739	0.999739	426.008	368.624	458.452	387.904	449.862	390.443	381.645	425.847
Alkbh7	429.232	0.045415	0.147009	0.308927	0.757377	0.999739	0.999739	500.559	394.446	473.185	322.379	461.753	441.993	413.691	425.847
Alkbh8	104.784	0.215563	0.276588	0.779364	0.435766	0.999739	0.999739	61.2386	122.875	71.9311	131.049	80.2618	109.782	141.296	119.842
Alms1	386.244	0.0337789	0.121119	0.278891	0.780329	0.999739	0.999739	373.644	413.144	320.657	419.355	358.701	401.899	386.015	416.539
Alox12	12.5188	0.161749	0.476763	0.339266	0.734409	0.999739	0.999739	7.98765	8.01357	12.133	19.2205	8.91798	16.2287	10.1966	17.4528
Alox12b	8.90543	-0.593858	0.517147	-1.14834	0.25083	0.999739	0.999739	15.0878	7.12318	12.133	8.73657	7.92709	8.59166	5.82664	5.81759
Alox15	20.7688	-0.080552	0.39393	-0.204483	0.837976	0.999739	0.999739	29.288	17.8079	20.7994	18.3468	22.7904	31.5028	11.6533	13.9622
Alox15b	2.03786	0.0250369	1.08795	0.023013	0.98164	0.999739	0.999739	0.887516	4.45199	0.86664	1.74731	0.990886	0.954629	2.91332	3.49055
Alox5	51.4198	0.215769	0.260621	0.827904	0.407725	0.999739	0.999739	54.1385	43.6295	58.9315	33.199	39.6354	60.1416	61.1797	60.5029
Alox5ap	60.432	0.154643	0.263823	0.586161	0.557767	0.999739	0.999739	51.476	73.0126	56.3316	47.1775	41.6172	73.5064	84.4863	55.8488
Aloxe3	126.542	-0.0203101	0.197902	-0.102627	0.918259	0.999739	0.999739	132.24	143.354	113.53	120.565	143.678	89.7351	112.163	157.075
Alpg	17.9914	-0.484719	0.40779	-1.18865	0.234578	0.999739	0.999739	19.5254	20.4791	12.9996	30.578	12.8815	10.5009	16.0233	20.9433
Alpk1	150.403	0.196668	0.206976	0.950199	0.342011	0.999739	0.999739	126.027	144.244	117.863	172.11	108.007	193.79	174.799	166.383
Alpk2	12.6476	-0.42842	0.444812	-0.963148	0.335473	0.999739	0.999739	14.2003	18.6983	12.9996	12.2312	5.94532	15.2741	10.1966	11.6352
Alpk3	45.6157	-0.35716	0.329224	-1.08485	0.277986	0.999739	0.999739	63.9012	48.9718	45.9319	45.4302	23.7813	28.6389	40.7865	67.484
Alpl	134.152	-0.165318	0.175934	-0.939661	0.347392	0.999739	0.999739	174.841	135.34	136.929	120.565	106.025	145.104	119.446	134.968
Alpp	0.441149	-2.09117	2.92807	-0.714182	0.475114	0.999739	0.999739	2.66255	0	0.86664	0	0	0	0	0
Als2	969.819	0.180767	0.149613	1.20823	0.22696	0.999739	0.999739	883.079	908.205	782.576	1062.37	854.144	1000.45	959.939	1307.79
Als2cl	230.88	0.0592359	0.142811	0.414785	0.678299	0.999739	0.999739	269.805	219.928	200.194	213.172	231.867	205.245	263.655	243.175
Alx1	0.930782	0.832239	1.85646	0.448294	0.653941	0.999739	0.999739	0	0.890397	1.73328	0	0	1.90926	2.91332	0
Alx3	6.51936	-0.00916673	0.591444	-0.0154989	0.987634	0.999739	0.999739	7.10013	4.45199	6.06648	8.73657	6.9362	9.54629	5.82664	3.49055
Alx4	0.929156	1.68455	1.72111	0.978759	0.327699	0.999739	0.999739	0	0	0.86664	0.873657	0	1.90926	1.45666	2.32704
Alyref	601.108	-0.0803625	0.144053	-0.557869	0.576934	0.999739	0.999739	617.711	614.374	694.178	546.909	747.128	547.002	509.831	531.728
Amacr	444.806	0.00508498	0.11435	0.0444687	0.964531	0.999739	0.999739	452.633	424.719	460.186	440.323	530.124	425.765	409.321	415.376
Ambp	4.50066	-0.0609008	0.682692	-0.0892068	0.928918	0.999739	0.999739	4.43758	2.67119	6.06648	5.24194	4.95443	4.77315	4.36998	3.49055
Ambra1	1054.05	0.0185747	0.104066	0.178489	0.858339	0.999739	0.999739	1067.68	1009.71	950.704	1161.09	971.068	1073	1006.55	1192.61
Amd1	2307.21	0.0849118	0.102098	0.831667	0.405597	0.999739	0.999739	1925.91	2389.83	2103.33	2537.97	2295.88	2375.12	2375.81	2453.86
Amdhd1	6.66349	-0.385125	0.618828	-0.622346	0.533714	0.999739	0.999739	7.98765	3.56159	11.2663	6.98926	3.96354	3.81852	8.73996	6.98111
Amdhd2	253.845	-0.151507	0.183351	-0.826319	0.408623	0.999739	0.999739	334.594	221.709	310.257	201.815	267.539	214.792	252.002	228.049
Amer1	198.939	0.199886	0.192749	1.03703	0.299721	0.999739	0.999739	145.553	194.107	154.262	246.371	176.378	212.882	214.129	247.829
Amer2	264.149	0.426604	0.231916	1.83947	0.0658455	0.999739	0.999739	189.929	255.544	162.062	293.549	200.159	315.982	307.355	388.615
Amer3	1034.57	-0.00763809	0.139611	-0.0547097	0.95637	0.999739	0.999739	1093.42	861.904	907.372	1285.15	1010.7	935.536	1131.82	1050.66
Amfr	6332.77	0.0219258	0.055659	0.393931	0.693632	0.999739	0.999739	6371.48	6093.88	6386.27	6286.84	6440.76	6467.61	6489.42	6125.92
Amh	3.69253	-0.532319	0.935146	-0.569236	0.569196	0.999739	0.999739	4.43758	1.78079	4.3332	6.98926	0.990886	2.86389	0	8.14462
Amhr2	8.72477	0.497327	0.531666	0.935413	0.349575	0.999739	0.999739	7.98765	5.34238	8.6664	6.98926	4.95443	14.3194	8.73996	12.7987
Amigo1	2656.93	0.0431602	0.0869915	0.496143	0.619794	0.999739	0.999739	2462.86	2534.07	2472.52	2999.26	2719.98	2661.51	2680.25	2724.96
Amigo2	294.556	-0.0425603	0.193836	-0.219568	0.826207	0.999739	0.999739	299.981	256.434	240.926	396.64	223.94	279.706	359.795	299.024
Amigo3	213.686	0.0380766	0.124532	0.305758	0.759789	0.999739	0.999739	224.542	184.312	220.993	214.046	233.849	209.064	209.759	212.924
Ammecr1	55.3215	0.460299	0.220992	2.08288	0.0372625	0.999739	0.999739	41.7133	55.2046	40.7321	48.0511	53.5079	60.1416	69.9197	73.3016
Ammecr1l	691.992	0.0719423	0.12127	0.59324	0.553021	0.999739	0.999739	628.362	651.771	597.115	820.364	682.721	669.195	760.376	726.035
Amn	3.78498	1.30769	0.866152	1.50977	0.131101	0.999739	0.999739	4.43758	0	2.59992	1.74731	3.96354	7.63703	2.91332	6.98111
Amn1	450.025	-0.0798411	0.146152	-0.54629	0.584866	0.999739	0.999739	378.969	456.774	552.916	463.038	503.37	465.859	380.188	399.087
Amot	332.851	0.160991	0.248113	0.64886	0.516429	0.999739	0.999739	251.167	310.749	214.06	480.511	242.767	365.623	403.495	394.432
Amotl1	191.73	0.240037	0.342603	0.700627	0.483536	0.999739	0.999739	137.565	190.545	108.33	265.592	105.034	151.786	324.835	250.156
Amotl2	492.13	0.107422	0.106042	1.01302	0.311052	0.999739	0.999739	481.921	490.609	466.252	456.049	443.917	525.046	499.634	573.614
Ampd1	0.88819	-0.0161763	1.58761	-0.0101891	0.99187	0.999739	0.999739	0.887516	0	1.73328	0.873657	0.990886	0	1.45666	1.16352
Ampd2	1731.84	-0.0703868	0.0986076	-0.713808	0.475346	0.999739	0.999739	1872.66	1645.45	1713.35	1861.76	1531.91	1557	1829.56	1843.01
Ampd3	1170.91	0.0143794	0.104855	0.137136	0.890923	0.999739	0.999739	1140.46	1270.6	1065.97	1180.31	1103.85	1044.36	1305.17	1256.6
Amph	5125.12	-0.0714851	0.10191	-0.701453	0.48302	0.999739	0.999739	4971.87	4854.44	4979.71	6202.96	5138.74	5244.73	4996.34	4612.18
Amt	1014.64	-0.0414015	0.0865723	-0.47823	0.632487	0.999739	0.999739	1066.79	986.56	1071.17	991.601	1030.52	910.716	984.702	1075.09
Amy1a	5.21084	-0.871488	1.35274	-0.64424	0.51942	0.999739	0.999739	2.66255	0	22.5326	1.74731	0.990886	0.954629	0	12.7987
Amz1	286.193	-0.0671206	0.202992	-0.330656	0.740904	0.999739	0.999739	332.819	292.941	264.325	278.697	208.086	211.928	388.928	311.823
Amz2	2702.12	0.0403127	0.0791623	0.509241	0.610583	0.999739	0.999739	2506.35	2721.94	2504.59	2925	2715.03	2838.11	2747.26	2658.64
Anapc1	1028.4	0.0706523	0.142737	0.494983	0.620612	0.999739	0.999739	886.629	1070.26	815.508	1239.72	924.497	1078.73	1109.97	1101.85
Anapc10	345.369	-0.0132921	0.124224	-0.107001	0.914788	0.999739	0.999739	324.831	390.884	376.988	295.296	330.956	366.578	348.142	329.275
Anapc13	522.468	-0.162736	0.155806	-1.04448	0.296265	0.999739	0.999739	615.936	542.252	648.246	401.882	541.024	507.863	479.241	443.3
Anapc15	498.179	-0.145499	0.110928	-1.31165	0.189638	0.999739	0.999739	542.273	501.294	589.315	460.417	497.425	478.269	483.611	432.829
Anapc16	280.835	-0.0341782	0.148687	-0.229866	0.818196	0.999739	0.999739	283.118	308.077	329.323	216.667	304.202	271.115	266.569	267.609
Anapc2	1758.39	0.00778841	0.0701975	0.11095	0.911656	0.999739	0.999739	1746.63	1818.19	1772.28	1680.04	1855.93	1795.66	1692.64	1705.72
Anapc4	936.989	-0.0703659	0.0841677	-0.836021	0.403143	0.999739	0.999739	970.055	982.998	959.37	927.824	997.822	902.124	919.152	836.569
Anapc5	4131.47	-0.015505	0.064708	-0.239615	0.810629	0.999739	0.999739	4314.22	3960.49	4341.86	3998.73	4125.06	4192.73	4103.41	4015.3
Anapc7	885.792	-0.0986041	0.0940831	-1.04805	0.294614	0.999739	0.999739	916.804	862.795	953.304	933.939	964.132	846.756	777.856	830.752
Angel1	265.498	-0.0622123	0.119785	-0.519368	0.603504	0.999739	0.999739	271.58	284.037	236.593	293.549	261.594	259.659	238.892	278.081
Angel2	1168.37	0.0621172	0.103649	0.599304	0.54897	0.999739	0.999739	1163.53	1185.12	975.836	1246.71	1113.76	1136.96	1261.47	1263.58
Angpt1	119.303	0.162096	0.211593	0.766074	0.443632	0.999739	0.999739	113.602	135.34	110.063	89.9867	115.934	88.7805	152.949	147.767
Angpt2	21.0485	0.0229906	0.367669	0.0625308	0.95014	0.999739	0.999739	15.0878	20.4791	25.9992	21.8414	12.8815	22.9111	18.9366	30.2515
Angpt4	11.3376	0.12753	0.497257	0.256466	0.797591	0.999739	0.999739	16.8628	10.6848	7.79976	7.86291	15.8542	5.72777	13.1099	12.7987
Angptl1	24.5008	0.164893	0.392533	0.420073	0.674432	0.999739	0.999739	15.0878	26.7119	34.6656	16.5995	34.681	32.4574	16.0233	19.7798
Angptl2	34.9522	-0.0931491	0.283912	-0.328091	0.742843	0.999739	0.999739	28.4005	37.3967	46.7985	32.3253	34.681	42.9583	29.1332	27.9244
Angptl4	100.962	0.0688358	0.185475	0.371133	0.710538	0.999739	0.999739	112.715	72.1222	110.063	98.7232	101.07	96.4175	110.706	105.88
Angptl6	21.2844	-0.119926	0.371396	-0.322907	0.746766	0.999739	0.999739	21.3004	23.1503	15.5995	28.8307	28.7357	13.3648	16.0233	23.2704
Angptl7	1.2816	-0.522558	1.39254	-0.375256	0.70747	0.999739	0.999739	2.66255	0.890397	2.59992	0	1.98177	0.954629	0	1.16352
Angptl8	0.34349	-0.363813	2.68957	-0.135268	0.8924	0.999739	0.999739	0	0.890397	0.86664	0	0.990886	0	0	0
Ank1	1125.51	0.173922	0.11015	1.57896	0.114346	0.999739	0.999739	978.931	1136.15	1051.23	1064.11	1041.42	1178.01	1152.22	1402.04
Ank2	8969.9	0.123081	0.23376	0.526526	0.598523	0.999739	0.999739	7419.64	8340.35	5868.02	12721.3	6042.42	10581.1	10731.2	10055.1
Ank3	5071.14	0.0897738	0.193608	0.463688	0.642872	0.999739	0.999739	4358.59	4719.1	3691.02	6884.42	3871.39	5892.93	5552.79	5598.85
Ankar	2.19255	0.0149911	1.21257	0.0123631	0.990136	0.999739	0.999739	0.887516	0.890397	6.06648	0.873657	4.95443	0.954629	2.91332	0
Ankdd1a	282.298	-0.129941	0.241991	-0.536966	0.591291	0.999739	0.999739	323.943	286.708	221.86	345.968	244.749	153.695	327.748	353.709
Ankdd1b	9.59374	-0.939569	0.539174	-1.74261	0.0814023	0.999739	0.999739	8.87516	11.5752	12.9996	16.5995	3.96354	3.81852	7.2833	11.6352
Ankef1	0.864688	-0.0677875	1.59168	-0.0425887	0.966029	0.999739	0.999739	1.77503	0	0.86664	0.873657	0.990886	0.954629	1.45666	0
Ankfn1	19.4022	0.666059	0.471292	1.41326	0.157579	0.999739	0.999739	11.5377	20.4791	7.79976	20.0941	9.90886	35.3213	29.1332	20.9433
Ankfy1	1362.54	0.15751	0.136581	1.15324	0.248812	0.999739	0.999739	1172.41	1339.16	1046.9	1593.55	1288.15	1432.9	1519.3	1507.92
Ankh	2697.51	0.128389	0.0934689	1.3736	0.169565	0.999739	0.999739	2406.06	2532.29	2495.06	2874.33	2533.7	2803.75	3057.53	2877.38
Ankib1	1076.16	0.104221	0.141594	0.736057	0.461696	0.999739	0.999739	888.404	1099.64	893.505	1266.8	939.36	1156.06	1174.07	1191.44
Ankk1	0.331446	-1.67781	2.65134	-0.632815	0.526855	0.999739	0.999739	0.887516	0.890397	0	0.873657	0	0	0	0
Ankle1	3.47366	0.486207	0.825919	0.588685	0.556072	0.999739	0.999739	2.66255	0.890397	3.46656	4.36829	2.97266	3.81852	7.2833	2.32704
Ankle2	1221.26	-0.00442616	0.11263	-0.0392983	0.968653	0.999739	0.999739	1104.96	1262.58	1132.7	1390.86	1135.56	1119.78	1242.53	1381.1
Ankmy1	76.0921	-0.197255	0.18613	-1.05977	0.289248	0.999739	0.999739	90.5267	76.5741	71.0644	86.492	75.3073	62.0509	75.7463	70.9746
Ankmy2	1873.18	-0.0803486	0.0922791	-0.870713	0.383911	0.999739	0.999739	1830.95	1891.2	2046.14	1936.02	1975.83	1959.85	1701.38	1644.05
Ankrd1	13.761	0.224937	0.409768	0.548937	0.583048	0.999739	0.999739	9.76268	10.6848	17.3328	13.1049	14.8633	18.138	14.5666	11.6352
Ankrd10	632.995	-0.0304708	0.148789	-0.204792	0.837734	0.999739	0.999739	618.599	595.676	588.448	753.966	587.596	490.679	689	739.997
Ankrd11	3453.43	0.0637162	0.140139	0.454663	0.649351	0.999739	0.999739	3160.45	3392.41	2766.31	4188.31	2989.5	3487.26	3764.01	3879.17
Ankrd12	871.892	0.236712	0.156518	1.51236	0.130442	0.999739	0.999739	659.425	929.574	737.51	874.531	725.329	1054.87	1073.56	920.342
Ankrd13a	1224.91	-0.129414	0.0913794	-1.41622	0.15671	0.999739	0.999739	1342.81	1352.51	1278.29	1146.24	1090.97	1220.97	1126	1241.47
Ankrd13b	1473.71	-0.00659328	0.073929	-0.0891839	0.928936	0.999739	0.999739	1585.99	1422.85	1494.09	1405.71	1493.27	1438.63	1443.55	1505.59
Ankrd13c	1379.56	0.0668923	0.093452	0.715794	0.474119	0.999739	0.999739	1185.72	1452.24	1291.29	1460.75	1351.57	1441.49	1424.61	1428.8
Ankrd13d	1505.29	-0.120675	0.0976804	-1.23541	0.21668	0.999739	0.999739	1718.23	1358.75	1590.28	1605.78	1560.65	1381.35	1445.01	1382.26
Ankrd16	89.291	-0.0174538	0.188643	-0.0925229	0.926283	0.999739	0.999739	115.377	79.2453	81.4641	83.8711	93.1433	93.5536	81.5729	86.1003
Ankrd17	2489.09	0.0467247	0.173548	0.269232	0.787751	0.999739	0.999739	2188.62	2367.57	1994.14	3243.89	1891.6	2723.56	2769.11	2734.27
Ankrd2	0.25377	0.355472	3.46111	0.102705	0.918198	0.999739	0.999739	0	0	0.86664	0	0	0	0	1.16352
Ankrd22	0.706637	-0.655497	1.81477	-0.361202	0.717949	0.999739	0.999739	0.887516	1.78079	0.86664	0	0	0.954629	0	1.16352
Ankrd23	11.4189	0.656077	0.471783	1.39063	0.164336	0.999739	0.999739	8.87516	10.6848	7.79976	7.86291	9.90886	9.54629	14.5666	22.1068
Ankrd24	307.104	-0.0776187	0.150846	-0.514554	0.606864	0.999739	0.999739	327.494	309.858	370.922	254.234	343.838	275.888	259.285	315.313
Ankrd26	219.331	0.178982	0.185017	0.96738	0.333354	0.999739	0.999739	203.241	241.298	146.462	230.645	205.113	199.517	272.395	255.974
Ankrd27	811.179	-0.184612	0.11753	-1.57076	0.116238	0.999739	0.999739	848.466	808.48	753.976	1040.53	767.937	711.199	767.66	791.192
Ankrd28	1817.82	0.00219256	0.105704	0.0207424	0.983451	0.999739	0.999739	1647.23	1966.89	1670.88	1978.83	1625.05	1758.43	1924.25	1971
Ankrd29	452.812	0.124243	0.105557	1.17702	0.239188	0.999739	0.999739	390.507	416.706	457.586	469.154	464.726	512.636	469.044	442.137
Ankrd33b	249.306	0.337176	0.210215	1.60396	0.108723	0.999739	0.999739	192.591	217.257	171.595	298.791	196.195	278.752	320.465	318.804
Ankrd34a	1516.1	0.0277649	0.0785791	0.353336	0.723836	0.999739	0.999739	1579.78	1359.64	1581.62	1485.22	1517.05	1544.59	1513.47	1547.48
Ankrd34b	490.225	0.183492	0.157134	1.16774	0.242912	0.999739	0.999739	382.52	476.362	497.451	481.385	538.051	648.193	495.264	402.577
Ankrd34c	114.709	0.257359	0.208468	1.23452	0.217008	0.999739	0.999739	76.3264	134.45	102.263	105.713	117.915	156.559	115.076	109.371
Ankrd35	163.377	0.0100971	0.150171	0.0672371	0.946393	0.999739	0.999739	183.716	146.025	171.595	151.143	181.332	159.423	136.926	176.855
Ankrd37	64.6369	0.034558	0.210418	0.164235	0.869546	0.999739	0.999739	62.1261	64.999	78.8642	49.7985	71.3438	66.824	62.6364	60.5029
Ankrd39	38.0579	-0.473797	0.252124	-1.87923	0.0602137	0.999739	0.999739	42.6008	40.9583	47.6652	46.3038	34.681	37.2305	30.5899	24.4339
Ankrd40	4220.24	0.0414684	0.0756842	0.547914	0.583751	0.999739	0.999739	4180.2	4343.36	4358.33	3757.6	4183.52	4469.57	4180.61	4288.73
Ankrd42	261.002	0.0417818	0.153572	0.272067	0.785571	0.999739	0.999739	285.78	277.804	227.06	240.256	321.047	258.704	209.759	267.609
Ankrd44	270.261	0.199413	0.13622	1.46391	0.14322	0.999739	0.999739	225.429	294.721	219.26	267.339	266.548	301.663	275.309	311.823
Ankrd45	565.565	0.105466	0.147347	0.715761	0.474139	0.999739	0.999739	564.46	534.238	418.587	661.358	511.297	588.051	632.19	614.337
Ankrd46	4520.69	-0.0613254	0.0657496	-0.932712	0.350969	0.999739	0.999739	4434.03	4554.38	4776.92	4704.64	4656.17	4513.49	4241.79	4284.07
Ankrd49	364.851	-0.13449	0.11783	-1.14139	0.253709	0.999739	0.999739	410.033	385.542	368.322	365.189	410.227	334.12	321.922	323.458
Ankrd50	340.067	0.205293	0.177377	1.15738	0.247118	0.999739	0.999739	289.33	291.16	264.325	418.482	283.393	411.445	377.275	385.124
Ankrd52	386.745	0.351785	0.453311	0.776034	0.437729	0.999739	0.999739	227.204	334.789	184.594	612.434	239.794	471.587	530.224	493.331
Ankrd53	0.85406	-0.0560728	2.21065	-0.0253649	0.979764	0.999739	0.999739	0	0	3.46656	0	0	1.90926	1.45666	0
Ankrd54	271.564	0.102193	0.126984	0.804772	0.420951	0.999739	0.999739	282.23	263.558	271.258	230.645	289.339	250.113	266.569	318.804
Ankrd55	159.873	-0.139146	0.151759	-0.916887	0.359202	0.999739	0.999739	148.215	148.696	188.061	186.089	169.442	154.65	144.209	139.622
Ankrd6	1253.23	0.132338	0.1007	1.31417	0.188788	0.999739	0.999739	1215.9	1220.73	1039.97	1304.37	1214.83	1253.43	1424.61	1352.01
Ankrd60	0.325867	-1.65726	3.19156	-0.519264	0.603577	0.999739	0.999739	0	0	1.73328	0.873657	0	0	0	0
Ankrd61	1.1228	0.0320744	1.51729	0.0211393	0.983135	0.999739	0.999739	3.55007	0	0.86664	0	0.990886	0.954629	1.45666	1.16352
Ankrd63	503.771	0.0598319	0.136107	0.439596	0.66023	0.999739	0.999739	455.296	495.951	435.053	588.845	499.407	588.051	436.998	530.564
Ankrd66	44.2054	-0.310443	0.276312	-1.12352	0.261215	0.999739	0.999739	53.251	39.1775	62.3981	41.0619	37.6537	49.6407	43.6998	26.7609
Ankrd7	1.94399	0.93999	1.07487	0.874513	0.381839	0.999739	0.999739	2.66255	0.890397	0.86664	0.873657	0.990886	2.86389	2.91332	3.49055
Ankrd9	396.215	0.22812	0.0933013	2.44498	0.0144861	0.999739	0.999739	371.869	342.803	383.055	362.568	424.099	441.993	420.975	422.357
Anks1a	711.913	0.110606	0.0919097	1.20342	0.228812	0.999739	0.999739	686.05	638.415	708.045	704.168	673.803	720.745	764.746	799.337
Anks1b	4494.61	0.113849	0.12615	0.902487	0.366798	0.999739	0.999739	3786.14	4654.11	3695.35	5133.61	4138.93	5006.07	4715.21	4827.43
Anks3	844.647	-0.0193649	0.0960306	-0.201654	0.840187	0.999739	0.999739	873.316	834.302	854.507	837.837	887.834	720.745	849.233	899.399
Anks4b	13.994	-0.326229	0.394453	-0.827039	0.408215	0.999739	0.999739	13.3127	16.9175	15.5995	16.5995	14.8633	10.5009	10.1966	13.9622
Anks6	213.789	0.0604085	0.134805	0.448116	0.654069	0.999739	0.999739	224.542	202.12	198.46	212.299	230.876	189.971	199.562	252.483
Ankub1	51.0752	0.348263	0.270381	1.28804	0.197731	0.999739	0.999739	46.1509	58.7662	46.7985	27.957	46.5717	56.3231	53.8964	72.1381
Ankzf1	510.917	-0.122865	0.11965	-1.02687	0.304481	0.999739	0.999739	599.961	489.718	477.518	562.635	470.671	446.766	485.068	554.998
Anln	664.825	0.132495	0.138578	0.956101	0.339021	0.999739	0.999739	679.838	714.098	558.116	582.729	589.577	630.055	828.839	735.343
Ano1	48.9675	-0.0667038	0.294827	-0.226247	0.821009	0.999739	0.999739	64.7887	50.7526	41.5987	42.8092	25.763	59.187	56.8097	50.0313
Ano10	734.03	-0.00137315	0.104435	-0.0131483	0.989509	0.999739	0.999739	733.089	726.564	813.775	666.6	783.791	790.433	665.693	692.293
Ano2	93.3739	-0.0941023	0.275331	-0.341779	0.732517	0.999739	0.999739	100.289	97.9437	48.5318	138.911	96.116	82.0981	88.8562	94.2449
Ano3	1008.45	0.149266	0.181083	0.824298	0.40977	0.999739	0.999739	899.942	996.354	698.512	1229.24	813.518	1051.05	1217.77	1161.19
Ano4	750.458	-0.0505208	0.108543	-0.465444	0.641614	0.999739	0.999739	760.602	812.932	819.841	663.106	748.119	820.981	684.63	693.457
Ano5	34.1698	-0.235321	0.396038	-0.594186	0.552388	0.999739	0.999739	33.7256	52.5334	15.5995	45.4302	17.836	33.412	42.2431	32.5785
Ano6	338.715	-0.157268	0.167521	-0.938797	0.347835	0.999739	0.999739	329.269	326.776	299.857	471.775	266.548	322.665	343.772	349.055
Ano7	0.305943	1.81337	3.25658	0.556834	0.577641	0.999739	0.999739	0	0	0	0	0.990886	0	1.45666	0
Ano8	962.876	0.032633	0.117817	0.276979	0.781796	0.999739	0.999739	1057.03	897.52	893.505	959.275	923.506	873.486	929.349	1169.34
Ano9	2.81376	0.622225	0.859995	0.723522	0.469359	0.999739	0.999739	1.77503	1.78079	2.59992	2.62097	3.96354	1.90926	4.36998	3.49055
Anp32a	4588.46	-0.118691	0.10621	-1.11751	0.263777	0.999739	0.999739	5009.14	5012.04	4959.78	4128.03	5058.47	4030.44	4352.5	4157.25
Anp32b	1358.22	-0.158763	0.125865	-1.26137	0.207174	0.999739	0.999739	1546.94	1492.31	1524.42	1168.08	1493.27	1149.37	1284.77	1206.57
Anp32e	2876.35	0.0434332	0.0773286	0.56167	0.574341	0.999739	0.999739	2659.89	2979.27	2832.18	2861.23	3157.95	2819.97	2949.74	2750.56
Anpep	36.3933	0.228012	0.307523	0.741445	0.458424	0.999739	0.999739	31.9506	19.5887	39.8654	41.9355	34.681	30.5481	49.5264	43.0502
Antkmt	802.238	-0.162455	0.129087	-1.25849	0.208213	0.999739	0.999739	960.293	796.905	929.904	702.42	854.144	673.013	747.266	753.959
Antxr1	144.055	0.208671	0.188161	1.109	0.267428	0.999739	0.999739	134.015	148.696	103.13	148.522	114.943	175.652	158.776	168.71
Antxr2	124.618	-0.120481	0.150856	-0.798653	0.424492	0.999739	0.999739	136.678	136.231	113.53	131.922	111.97	110.737	126.729	129.15
Anxa1	47.5904	-0.504499	0.256378	-1.96779	0.0490919	0.999739	0.999739	53.251	59.6566	58.0649	51.5458	43.599	36.2759	53.8964	24.4339
Anxa11	3331.15	-0.19646	0.120825	-1.62599	0.103951	0.999739	0.999739	3646.8	3165.36	3439.69	3976.01	3172.82	2508.77	3431.89	3307.88
Anxa13	0.341568	-0.374449	2.69582	-0.1389	0.889529	0.999739	0.999739	0.887516	0.890397	0	0	0	0.954629	0	0
Anxa2	149.881	-0.17828	0.187956	-0.948517	0.342866	0.999739	0.999739	171.291	145.135	202.794	117.944	153.587	148.922	132.556	126.823
Anxa3	1130.04	-0.199506	0.112327	-1.77612	0.0757134	0.999739	0.999739	1218.56	1218.06	1357.16	1039.65	1156.36	1086.37	1035.68	928.487
Anxa4	522.247	0.160964	0.172026	0.935696	0.34943	0.999739	0.999739	425.12	530.677	590.182	427.218	652.003	589.961	563.727	399.087
Anxa5	1221.65	-0.0454407	0.112842	-0.402694	0.687173	0.999739	0.999739	1315.3	1198.47	1382.29	1068.48	1352.56	1189.47	1179.89	1086.73
Anxa6	2118.32	-0.2236	0.107179	-2.08623	0.0369582	0.999739	0.999739	2435.34	1963.33	2506.32	2221.71	2047.17	1768.93	2128.18	1875.59
Anxa7	1765.48	-0.00520723	0.0847787	-0.0614215	0.951024	0.999739	0.999739	1661.43	1665.93	1794.81	1952.62	1769.72	1829.07	1794.6	1655.69
Anxa8	8.24502	1.10643	0.763687	1.4488	0.147393	0.999739	0.999739	7.10013	5.34238	8.6664	0	22.7904	9.54629	4.36998	8.14462
Anxa9	4.47369	-0.194683	0.846688	-0.229934	0.818143	0.999739	0.999739	10.6502	1.78079	5.19984	1.74731	5.94532	6.6824	1.45666	2.32704
Aoah	1.71012	-0.797676	1.47831	-0.539588	0.589482	0.999739	0.999739	2.66255	5.34238	0.86664	0	0.990886	3.81852	0	0
Aoc1	0.412351	1.07094	2.55664	0.418888	0.675298	0.999739	0.999739	0.887516	0	0	0	0	0.954629	1.45666	0
Aopep	251.528	-0.0447905	0.154197	-0.290476	0.771452	0.999739	0.999739	280.455	219.928	251.325	269.086	265.557	189.971	252.002	283.898
Aox1	117.989	0.0377258	0.39812	0.09476	0.924505	0.999739	0.999739	160.64	56.095	109.197	140.659	133.77	138.421	36.4165	168.71
Aox2	0.37763	1.08918	2.61312	0.416814	0.676814	0.999739	0.999739	0	0	0.86664	0	0.990886	0	0	1.16352
Aox4	10.254	-0.0172196	0.485268	-0.0354848	0.971693	0.999739	0.999739	10.6502	10.6848	12.9996	6.98926	8.91798	14.3194	11.6533	5.81759
Ap1ar	1657.33	-0.119899	0.0688701	-1.74095	0.0816932	0.999739	0.999739	1667.64	1752.3	1757.55	1725.47	1600.28	1493.04	1606.7	1655.69
Ap1b1	2776.33	-0.018317	0.0640711	-0.285886	0.774965	0.999739	0.999739	2840.05	2636.47	2791.45	2906.66	2701.16	2783.7	2827.38	2723.79
Ap1g1	1297.31	0.239265	0.174229	1.37328	0.169667	0.999739	0.999739	1011.77	1208.27	956.77	1582.19	1094.93	1481.58	1557.17	1485.81
Ap1g2	707.507	0.0806157	0.12973	0.62141	0.53433	0.999739	0.999739	678.95	737.249	578.915	753.966	623.267	675.877	793.879	817.953
Ap1m1	1942.95	-0.0673345	0.0756122	-0.890523	0.373185	0.999739	0.999739	2113.18	1926.82	1956.87	1958.74	1965.92	2001.86	1841.22	1779.02
Ap1m2	18.5175	-0.165347	0.425646	-0.388461	0.697675	0.999739	0.999739	15.9753	24.0407	25.1325	13.9785	24.7722	23.8657	8.73996	11.6352
Ap1s1	2981.96	-0.0913562	0.10234	-0.892677	0.37203	0.999739	0.999739	3166.66	3013.99	3317.5	2808.81	3368.02	2700.65	2722.5	2757.54
Ap1s2	621.841	-0.0510528	0.111363	-0.458435	0.64664	0.999739	0.999739	571.561	686.496	692.445	581.856	663.894	626.237	603.057	549.18
Ap1s3	103.127	0.0647557	0.221734	0.292043	0.770254	0.999739	0.999739	75.4389	143.354	101.397	82.9974	93.1433	109.782	104.879	114.025
Ap2a1	4098.69	0.0510091	0.085307	0.597947	0.549875	0.999739	0.999739	4103.88	3582.07	4126.07	4292.28	3995.25	4396.07	4337.93	3955.96
Ap2a2	8561.74	-0.00540908	0.0758373	-0.0713248	0.943139	0.999739	0.999739	8376.38	8210.35	8322.34	9401.42	8085.63	8963.01	8763.26	8371.51
Ap2b1	5726.31	0.0291657	0.11714	0.248981	0.803376	0.999739	0.999739	5432.49	5200.81	5238.84	6801.42	5063.43	6406.52	5858.68	5808.28
Ap2m1	16000.9	-0.0516449	0.0852364	-0.605902	0.54458	0.999739	0.999739	16490.9	15437.7	17271.3	15952.1	17278.1	16364.3	14860.8	14352
Ap2s1	2577.98	0.0356638	0.125211	0.28483	0.775774	0.999739	0.999739	2671.42	2497.56	2956.11	2060.96	2738.81	2644.32	2268.02	2786.62
Ap3b1	508.791	-0.0587439	0.132884	-0.442071	0.658438	0.999739	0.999739	510.322	511.088	446.319	607.192	418.154	492.589	544.791	539.872
Ap3b2	3623.85	-0.1183	0.0931235	-1.27036	0.203957	0.999739	0.999739	3899.75	3296.25	3716.15	4178.7	3416.58	3706.82	3302.25	3474.26
Ap3d1	4746.09	0.0105513	0.0662505	0.159264	0.873461	0.999739	0.999739	4734.9	4516.09	4659.92	5001.69	4549.16	4793.19	4975.95	4737.84
Ap3m1	928.067	-0.0471691	0.0824366	-0.572186	0.567196	0.999739	0.999739	907.042	1031.97	912.572	922.582	953.233	916.444	892.932	887.764
Ap3m2	2301.16	-0.0157848	0.0853513	-0.184939	0.853277	0.999739	0.999739	2256.07	2270.51	2141.47	2587.77	2235.44	2431.44	2266.56	2219.99
Ap3s1	1367.33	-0.142036	0.114105	-1.24478	0.213214	0.999739	0.999739	1401.39	1429.98	1650.08	1258.94	1463.54	1277.29	1150.76	1306.63
Ap3s2	998.301	-0.0782436	0.113109	-0.691755	0.489091	0.999739	0.999739	1061.47	965.19	1145.7	931.318	1113.76	990.905	885.649	892.418
Ap4b1	384.418	0.116475	0.11861	0.982004	0.326098	0.999739	0.999739	362.994	353.488	383.055	376.546	470.671	348.44	384.558	395.596
Ap4e1	125.377	0.215227	0.254414	0.84597	0.397569	0.999739	0.999739	80.764	107.738	94.4637	180.847	105.034	138.421	139.839	155.911
Ap4m1	787.844	-0.0979015	0.0917028	-1.0676	0.285703	0.999739	0.999739	881.304	736.358	798.175	843.953	799.645	759.885	716.677	766.758
Ap4s1	416.072	-0.0970626	0.101864	-0.952869	0.340656	0.999739	0.999739	434.883	412.254	467.119	407.124	436.981	402.853	390.385	376.98
Ap5b1	235.488	0.0785089	0.128913	0.609006	0.542521	0.999739	0.999739	229.867	191.435	253.925	240.256	244.749	231.975	257.829	233.867
Ap5m1	193.585	0.268468	0.247942	1.08279	0.278903	0.999739	0.999739	163.303	197.668	110.93	229.772	150.615	182.334	235.979	278.081
Ap5s1	146.92	-0.00739147	0.162366	-0.0455234	0.96369	0.999739	0.999739	135.79	173.627	159.462	120.565	132.779	159.423	141.296	152.421
Apaf1	434.965	0.0835002	0.18121	0.460792	0.644948	0.999739	0.999739	357.669	439.856	316.323	575.74	400.318	476.36	434.085	479.369
Apba1	1562.43	0.247342	0.209295	1.18178	0.237292	0.999739	0.999739	1217.67	1484.29	1086.77	1925.54	1117.72	1766.06	1954.84	1946.56
Apba2	4005.01	0.0159868	0.129958	0.123014	0.902096	0.999739	0.999739	3881.11	3663.98	3476.09	4909.08	3472.07	4333.06	4368.52	3936.18
Apba3	352.354	0.0464494	0.177252	0.262053	0.793281	0.999739	0.999739	444.646	319.653	310.257	311.022	349.783	270.16	381.645	431.665
Apbb1	9070.75	-0.0352667	0.0790469	-0.446149	0.655489	0.999739	0.999739	9337.56	8800.68	9969.82	8620.37	9639.34	8986.88	8623.42	8587.92
Apbb1ip	193.393	-0.158992	0.144215	-1.10247	0.270257	0.999739	0.999739	212.116	209.243	209.727	184.342	170.432	201.427	209.759	150.094
Apbb2	1146.83	0.0334604	0.125928	0.265711	0.790462	0.999739	0.999739	1028.63	1195.8	1036.5	1272.04	939.36	1210.47	1206.11	1285.69
Apbb3	959.054	-0.0366441	0.0826374	-0.443433	0.657453	0.999739	0.999739	980.706	969.642	921.238	1012.57	990.886	866.803	949.742	980.845
Apc	4126.97	0.169934	0.209122	0.812609	0.416442	0.999739	0.999739	3097.43	4338.9	2779.31	5320.57	3149.04	4945.93	4820.09	4564.48
Apc2	2900.92	0.154115	0.140205	1.09921	0.271676	0.999739	0.999739	2652.79	2528.73	2487.26	3314.65	2450.46	3041.45	3115.79	3616.21
Apcdd1	701.013	-0.135667	0.117824	-1.15144	0.249552	0.999739	0.999739	796.102	729.235	701.111	705.915	603.45	579.46	774.943	717.89
Apcdd1l	0.744482	-0.633808	1.97207	-0.321392	0.747913	0.999739	0.999739	1.77503	0	1.73328	0	0.990886	0	1.45666	0
Apeg3	0.228536	0.355471	3.53381	0.100591	0.919875	0.999739	0.999739	0	0	0	0.873657	0	0.954629	0	0
Apeh	765.226	-0.0440212	0.0961334	-0.457917	0.647012	0.999739	0.999739	855.566	718.55	805.975	726.009	762.982	698.788	789.51	764.431
Apela	6.08865	3.0361	2.00912	1.51116	0.130747	0.999739	0.999739	0	3.56159	1.73328	0	0.990886	2.86389	0	39.5596
Apex1	1518.48	-0.122492	0.109327	-1.12042	0.262533	0.999739	0.999739	1672.08	1460.25	1753.21	1446.78	1670.63	1364.16	1433.35	1347.35
Apex2	93.4064	0.0456111	0.176079	0.259037	0.795606	0.999739	0.999739	92.3017	87.2589	95.3304	91.734	104.043	75.4157	109.249	91.9179
Aph1a	1103.8	-0.00944453	0.0698686	-0.135176	0.892473	0.999739	0.999739	1089.87	1097.86	1140.5	1100.81	1054.3	1107.37	1098.32	1141.41
Aph1b	51.0423	0.151947	0.230394	0.659512	0.509567	0.999739	0.999739	52.3635	50.7526	48.5318	41.9355	68.3711	43.9129	52.4397	50.0313
Api5	2277.94	0.116113	0.0622826	1.8643	0.06228	0.999739	0.999739	2114.06	2274.96	2164.87	2190.26	2347.41	2309.25	2387.47	2435.24
Apip	200.389	-0.146165	0.131776	-1.10919	0.267347	0.999739	0.999739	197.916	238.626	198.46	207.057	210.068	176.606	195.192	179.182
Aplf	114.723	0.136379	0.16656	0.818794	0.412904	0.999739	0.999739	122.477	102.396	97.9303	113.575	129.806	98.3268	131.099	122.169
Aplnr	80.6376	0.13013	0.326523	0.398533	0.690237	0.999739	0.999739	124.252	48.0814	81.4641	53.2931	59.4532	67.7787	116.533	94.2449
Aplp1	28496.5	-0.0304701	0.0967785	-0.314844	0.75288	0.999739	0.999739	31222.8	28251.4	30920	24797	30604.5	27977.3	26576.8	27621.9
Aplp2	10250.4	0.00468375	0.0829911	0.0564367	0.954994	0.999739	0.999739	9775.99	10087.3	9563.37	11508.7	9822.65	10811.2	10294.2	10140.1
Apmap	842.182	-0.0609534	0.0934228	-0.652446	0.514113	0.999739	0.999739	848.466	837.864	873.573	882.394	822.436	933.627	785.14	753.959
Apoa1	5.41238	-0.14262	0.653215	-0.218335	0.827168	0.999739	0.999739	6.21261	7.12318	4.3332	5.24194	8.91798	4.77315	4.36998	2.32704
Apoa2	0.21927	-1.08482	3.53315	-0.307039	0.758813	0.999739	0.999739	0.887516	0	0.86664	0	0	0	0	0
Apoa5	16.1183	0.860774	0.619275	1.38997	0.164538	0.999739	0.999739	13.3127	16.9175	9.53304	6.1156	18.8268	9.54629	5.82664	48.8677
Apobec1	22.2024	0.187941	0.335407	0.560338	0.575249	0.999739	0.999739	20.4129	24.0407	22.5326	16.5995	32.6992	22.9111	17.4799	20.9433
Apobec2	3.08186	0.392831	0.933431	0.420847	0.673867	0.999739	0.999739	0	2.67119	5.19984	2.62097	1.98177	2.86389	5.82664	3.49055
Apobec3	6.03842	-0.147119	0.609215	-0.24149	0.809175	0.999739	0.999739	7.98765	8.01357	4.3332	5.24194	5.94532	5.72777	2.91332	8.14462
Apobec4	0.94422	1.69851	1.71926	0.987933	0.323186	0.999739	0.999739	0	0	0.86664	0.873657	0.990886	1.90926	2.91332	0
Apobr	89.8737	-0.332404	0.195467	-1.70056	0.0890258	0.999739	0.999739	115.377	109.519	97.9303	76.8818	69.362	73.5064	90.3129	86.1003
Apoc2	2.00108	-0.232764	1.20451	-0.193243	0.846769	0.999739	0.999739	0	2.67119	4.3332	1.74731	1.98177	3.81852	1.45666	0
Apoc3	0.725076	-0.55074	2.27356	-0.242237	0.808597	0.999739	0.999739	0	0	2.59992	0.873657	0	0	0	2.32704
Apoc4	12.7774	-0.429321	0.432316	-0.993072	0.320675	0.999739	0.999739	16.8628	18.6983	12.133	11.3575	13.8724	12.4102	8.73996	8.14462
Apod	3960.74	-0.0736587	0.175158	-0.420526	0.674101	0.999739	0.999739	4068.38	4459.11	5075.04	2645.43	4362.87	3740.24	3579.01	3755.83
Apoe	59941.4	0.00140311	0.137649	0.0101934	0.991867	0.999739	0.999739	68678.7	57854.4	67416.8	45698.4	60806.7	52533.2	60822.8	65720.1
Apoh	4.26544	0.0694982	0.852508	0.081522	0.935027	0.999739	0.999739	0	8.01357	5.19984	3.49463	5.94532	4.77315	4.36998	2.32704
Apol2	1.07728	-0.016458	1.55859	-0.0105595	0.991575	0.999739	0.999739	1.77503	0	1.73328	0.873657	0	1.90926	0	2.32704
Apol3	41.3448	-0.0567211	0.253408	-0.223833	0.822887	0.999739	0.999739	43.4883	43.6295	48.5318	32.3253	41.6172	31.5028	46.6131	43.0502
Apol9a	11.8231	-0.429868	0.576407	-0.745771	0.455806	0.999739	0.999739	18.6378	17.8079	4.3332	13.9785	7.92709	19.0926	5.82664	6.98111
Apold1	107.753	-0.170391	0.342029	-0.498177	0.618359	0.999739	0.999739	88.7516	90.8205	128.263	149.395	59.4532	155.605	52.4397	137.295
Apom	20.6952	-0.0569224	0.323254	-0.176092	0.860222	0.999739	0.999739	23.0754	16.9175	23.3993	20.9678	19.8177	20.0472	20.3932	20.9433
Apon	0.217537	-1.08269	3.53326	-0.306427	0.759279	0.999739	0.999739	0	0	0.86664	0.873657	0	0	0	0
Apoo	613.435	-0.12255	0.13915	-0.880704	0.378478	0.999739	0.999739	640.787	671.359	724.511	522.447	624.258	664.422	576.837	482.86
Apool	129.096	-0.0976598	0.161129	-0.606096	0.544451	0.999739	0.999739	112.715	149.587	147.329	124.059	136.742	118.374	131.099	112.861
App	30822.3	-0.00356315	0.0653642	-0.0545122	0.956527	0.999739	0.999739	29910.2	30074.9	31008.4	32451.1	30874	32706.5	29334.2	30218.9
Appbp2	1969.34	0.0830617	0.119651	0.694202	0.487555	0.999739	0.999739	1668.53	1991.82	1712.48	2276.75	1812.33	2060.09	2132.55	2100.15
Appl1	995.554	0.223673	0.146161	1.53032	0.125938	0.999739	0.999739	723.326	1055.12	810.308	1085.08	949.269	1155.1	1109.97	1076.25
Appl2	926.746	-0.017179	0.0963297	-0.178335	0.85846	0.999739	0.999739	877.754	971.423	994.036	885.015	811.536	975.631	941.002	957.575
Aprt	696.48	-0.138396	0.118628	-1.16664	0.243354	0.999739	0.999739	804.977	673.14	805.975	636.896	743.165	667.286	619.08	621.318
Aptx	376.188	0.207856	0.163063	1.2747	0.202415	0.999739	0.999739	312.406	322.324	307.657	453.428	331.947	403.808	413.691	464.244
Aqp1	14.6417	0.306377	0.430221	0.712139	0.476378	0.999739	0.999739	15.0878	19.5887	7.79976	9.61023	12.8815	14.3194	20.3932	17.4528
Aqp11	217.197	0.0217325	0.136154	0.159617	0.873183	0.999739	0.999739	189.929	221.709	247.859	203.562	246.731	213.837	206.846	207.106
Aqp2	0.256739	0.355472	3.4477	0.103104	0.91788	0.999739	0.999739	0	0.890397	0	0	0	0	0	1.16352
Aqp3	0.865048	-0.0699689	1.5087	-0.0463771	0.96301	0.999739	0.999739	0.887516	0.890397	0.86664	0.873657	0.990886	0.954629	1.45666	0
Aqp4	11630.2	0.167721	0.116489	1.4398	0.149923	0.999739	0.999739	11098.4	11673.1	10628.5	10416.6	10120.9	11473.7	14260.7	13370
Aqp5	4.00677	-0.0618001	0.773756	-0.0798703	0.93634	0.999739	0.999739	4.43758	2.67119	6.06648	3.49463	3.96354	7.63703	1.45666	2.32704
Aqp9	240.34	-0.175136	0.164305	-1.06592	0.28646	0.999739	0.999739	257.38	253.763	315.457	193.952	239.794	247.249	212.672	202.452
Aqr	910.079	0.0443753	0.138483	0.32044	0.748635	0.999739	0.999739	832.49	873.479	747.91	1129.64	813.518	942.219	968.679	972.701
Ar	54.0448	0.3727	0.387077	0.962858	0.335619	0.999739	0.999739	29.288	42.7391	32.0657	83.8711	29.7266	69.6879	78.6596	66.3205
Araf	2591.54	-0.00532006	0.0837022	-0.0635594	0.949321	0.999739	0.999739	2430.02	2619.55	2726.45	2611.36	2720.97	2758.88	2528.76	2336.34
Arap1	541.375	0.0566284	0.115117	0.491922	0.622774	0.999739	0.999739	531.622	536.909	519.984	532.931	470.671	525.046	562.271	651.57
Arap2	1118.98	0.202582	0.138552	1.46214	0.143703	0.999739	0.999739	1000.23	1277.72	1091.1	793.281	1204.92	1228.61	1213.4	1142.57
Arap3	181.599	0.058456	0.141621	0.412763	0.67978	0.999739	0.999739	170.403	168.285	168.995	202.688	191.241	171.833	214.129	165.22
Arc	1859.19	-0.0777557	0.220398	-0.352797	0.724241	0.999739	0.999739	1624.15	1530.59	2379.79	2104.64	1827.19	2496.35	1114.34	1796.47
Arcn1	3224.33	0.00292777	0.0778318	0.0376166	0.969993	0.999739	0.999739	2983.83	3252.62	3136.37	3511.23	3143.09	3365.07	3293.51	3108.92
Areg	0.794625	-1.00926	1.78128	-0.566591	0.570992	0.999739	0.999739	0	2.67119	0.86664	0.873657	0.990886	0.954629	0	0
Arel1	2720.24	0.0467429	0.128614	0.363435	0.71628	0.999739	0.999739	2485.93	2628.45	2350.33	3240.39	2404.88	3188.46	2726.87	2736.59
Arf1	12492.6	-0.0243187	0.0744729	-0.326545	0.744012	0.999739	0.999739	12484.7	11974.1	13411.2	12523.9	13247.2	12729	11997	11573.5
Arf2	667.778	0.0129644	0.107303	0.12082	0.903833	0.999739	0.999739	672.737	658.003	695.045	635.149	775.864	677.787	642.387	585.249
Arf4	2480.35	-0.018448	0.0603849	-0.305507	0.75998	0.999739	0.999739	2485.05	2533.18	2474.26	2494.29	2585.22	2435.26	2399.12	2436.41
Arf5	4243.43	-0.0345538	0.125905	-0.274444	0.783743	0.999739	0.999739	4563.61	4129.66	4936.38	3548.79	4893	4004.67	3822.27	4049.04
Arf6	1465.45	0.0396715	0.0919818	0.431298	0.666252	0.999739	0.999739	1280.69	1583.13	1458.55	1459.88	1575.51	1508.31	1468.31	1389.24
Arfgap1	1.72522	-1.16247	1.15955	-1.00251	0.316096	0.999739	0.999739	3.55007	2.67119	1.73328	1.74731	1.98177	0.954629	0	1.16352
Arfgap2	1371.01	-0.131888	0.0869074	-1.51757	0.129122	0.999739	0.999739	1452.86	1359.64	1564.28	1358.54	1419.94	1276.34	1294.97	1241.47
Arfgap3	415.898	-0.109594	0.094916	-1.15464	0.248236	0.999739	0.999739	434.883	418.487	443.719	429.839	430.045	372.305	391.841	406.068
Arfgef1	1740.78	0.200059	0.0909943	2.19859	0.0279068	0.999739	0.999739	1520.32	1808.4	1479.35	1672.18	1762.79	1905.44	1941.73	1836.03
Arfgef2	685.152	0.213617	0.238191	0.896833	0.369808	0.999739	0.999739	515.647	624.168	441.986	955.781	497.425	800.934	786.596	858.676
Arfgef3	560.859	0.324122	0.577667	0.561088	0.574738	0.999739	0.999739	277.793	525.334	206.26	982.864	285.375	639.601	786.596	783.047
Arfip1	427.418	0.0165066	0.107148	0.154053	0.877568	0.999739	0.999739	420.683	480.814	422.053	375.673	418.154	428.628	448.651	424.684
Arfip2	2004.47	0.00686531	0.079303	0.0865706	0.931013	0.999739	0.999739	2102.53	1948.19	2102.47	1846.91	2137.34	2001.86	1970.86	1925.62
Arfrp1	1156.05	-0.0611256	0.0776338	-0.787358	0.431072	0.999739	0.999739	1162.65	1176.21	1227.16	1159.34	1203.93	1157.97	1042.97	1118.14
Arg1	253.816	-0.342187	0.122872	-2.7849	0.0053544	0.999739	0.999739	307.968	266.229	287.724	270.834	217.995	205.245	259.285	215.251
Arg2	76.8514	-0.152955	0.219336	-0.697354	0.485582	0.999739	0.999739	63.0137	73.0126	108.33	79.5028	75.3073	67.7787	64.093	83.7733
Arglu1	1572.35	-0.0997786	0.101398	-0.984034	0.325099	0.999739	0.999739	1561.14	1612.51	1649.22	1683.54	1663.7	1285.89	1474.14	1648.7
Arhgap1	1263.85	0.0333753	0.0879643	0.379418	0.704377	0.999739	0.999739	1270.92	1153.06	1202.03	1369.89	1202.94	1329.8	1337.21	1244.96
Arhgap10	245.808	-0.119987	0.119867	-1.001	0.316829	0.999739	0.999739	245.842	279.585	259.992	239.382	256.64	219.565	219.956	245.502
Arhgap11a	66.7261	-0.0839459	0.253267	-0.331452	0.740303	0.999739	0.999739	70.1138	83.6973	76.2643	43.6829	60.4441	60.1416	85.9429	53.5218
Arhgap12	1289.02	0.129865	0.104989	1.23695	0.216107	0.999739	0.999739	1176.85	1356.07	1340.69	1051.88	1424.89	1368.94	1274.58	1318.27
Arhgap15	68.4233	-0.214948	0.192803	-1.11486	0.264911	0.999739	0.999739	85.2016	77.4645	67.5979	63.777	63.4167	63.0055	64.093	62.83
Arhgap17	153.662	0.113618	0.22843	0.497386	0.618917	0.999739	0.999739	165.966	137.121	103.997	182.594	114.943	145.104	168.973	210.597
Arhgap18	104.429	-0.136698	0.170371	-0.802355	0.422348	0.999739	0.999739	124.252	107.738	100.53	104.839	114.943	90.6898	106.336	86.1003
Arhgap19	65.8402	0.240004	0.236524	1.01471	0.310243	0.999739	0.999739	60.3511	50.7526	50.2651	80.3764	58.4623	79.2342	61.1797	86.1003
Arhgap20	1038.44	0.16286	0.185178	0.879481	0.37914	0.999739	0.999739	874.204	1031.08	695.045	1318.35	898.734	1127.42	1241.07	1121.63
Arhgap21	5007.83	0.0365923	0.192307	0.190281	0.849089	0.999739	0.999739	4775.73	4768.08	3520.29	6712.31	3805.99	5061.44	5475.58	5943.25
Arhgap22	167.568	-0.00437707	0.18224	-0.0240181	0.980838	0.999739	0.999739	185.491	162.943	196.727	125.807	194.214	149.877	183.539	141.949
Arhgap23	2580.33	0.186658	0.103071	1.81096	0.0701465	0.999739	0.999739	2494.81	2591.06	2274.93	2292.48	2336.51	2771.29	2809.9	3071.69
Arhgap24	117.963	-0.0203715	0.177008	-0.115088	0.908376	0.999739	0.999739	88.7516	137.121	129.996	119.691	113.952	128.875	113.619	111.698
Arhgap25	261.938	-0.0449104	0.133262	-0.337009	0.73611	0.999739	0.999739	254.717	268.9	301.591	239.382	292.311	256.795	260.742	221.068
Arhgap26	567.789	0.222121	0.381934	0.58157	0.560857	0.999739	0.999739	364.769	479.034	337.123	915.593	405.272	733.155	662.78	644.589
Arhgap27	155.312	-0.00753774	0.13516	-0.0557691	0.955526	0.999739	0.999739	152.653	153.148	168.995	146.774	152.596	146.058	173.342	148.93
Arhgap28	15.7876	0.249899	0.424346	0.588904	0.555926	0.999739	0.999739	15.0878	16.0271	14.7329	11.3575	10.8997	20.0472	27.6765	10.4717
Arhgap29	197.987	0.0752605	0.164745	0.45683	0.647793	0.999739	0.999739	156.203	185.203	205.394	223.656	164.487	226.247	227.239	195.471
Arhgap30	20.3493	-0.0116997	0.385474	-0.0303513	0.975787	0.999739	0.999739	23.9629	14.2464	14.7329	28.8307	21.7995	15.2741	16.0233	27.9244
Arhgap31	191.461	0.104243	0.231952	0.449416	0.653132	0.999739	0.999739	182.828	176.299	132.596	245.498	128.815	220.519	246.175	198.962
Arhgap32	1894.44	0.385219	0.242155	1.5908	0.111655	0.999739	0.999739	1348.14	1706.89	1047.77	2468.95	1464.53	2538.36	2301.52	2279.33
Arhgap33	2449.03	0.0671464	0.0825489	0.813414	0.415981	0.999739	0.999739	2573.8	2172.57	2374.59	2446.24	2336.51	2605.18	2589.94	2493.42
Arhgap35	4183.82	0.0804531	0.132348	0.607891	0.54326	0.999739	0.999739	4039.09	3970.28	3347.83	4910.83	3607.82	4567.9	4482.14	4544.7
Arhgap36	17.0627	-0.123268	0.651155	-0.189307	0.849852	0.999739	0.999739	28.4005	6.23278	10.3997	26.2097	8.91798	32.4574	20.3932	3.49055
Arhgap39	1764.91	-0.0299773	0.117551	-0.255016	0.798711	0.999739	0.999739	1798.11	1717.58	1605.88	2009.41	1521.01	1615.23	1836.85	2015.21
Arhgap4	160.227	-0.139366	0.22215	-0.627351	0.530429	0.999739	0.999739	168.628	170.066	122.196	209.678	125.843	114.555	171.886	198.962
Arhgap40	1.90217	0.550553	1.09857	0.501157	0.616261	0.999739	0.999739	1.77503	0	2.59992	1.74731	0.990886	2.86389	2.91332	2.32704
Arhgap42	98.3886	0.0960352	0.198285	0.484328	0.628153	0.999739	0.999739	82.539	89.9301	84.064	123.186	87.198	108.828	119.446	91.9179
Arhgap44	3766.44	0.00345857	0.0748687	0.0461952	0.963155	0.999739	0.999739	3688.52	3769.94	3738.68	3851.08	3475.04	4125.91	3774.21	3708.13
Arhgap45	127.94	0.0637653	0.160983	0.3961	0.692031	0.999739	0.999739	151.765	126.436	115.263	106.586	123.861	128.875	136.926	133.805
Arhgap5	1114.28	0.461802	0.220937	2.0902	0.0366	0.999739	0.999739	885.741	1386.35	849.307	627.286	1121.68	1072.05	1631.46	1340.37
Arhgap6	414.116	0.0799881	0.229209	0.348975	0.727108	0.999739	0.999739	354.119	389.994	361.389	505.847	337.892	650.102	412.235	301.351
Arhgap8	16.1252	-0.327895	0.410816	-0.798154	0.424781	0.999739	0.999739	15.0878	12.4656	16.4662	27.957	17.836	12.4102	11.6533	15.1257
Arhgap9	78.6768	-0.372293	0.226203	-1.64584	0.0997972	0.999739	0.999739	93.1892	80.1357	116.996	65.5243	67.3803	76.3703	55.3531	74.4651
Arhgdia	7240.9	-0.0156282	0.0931915	-0.1677	0.866819	0.999739	0.999739	7627.32	6995.85	8045.02	6453.7	7583.25	7493.84	7041.49	6686.74
Arhgdib	196.374	-0.26633	0.171226	-1.55542	0.119845	0.999739	0.999739	240.517	178.97	244.392	193.952	167.46	210.018	193.736	141.949
Arhgdig	0.55779	1.70863	2.09372	0.816072	0.414459	0.999739	0.999739	0.887516	0	0	0	0	0.954629	1.45666	1.16352
Arhgef1	1004.35	-0.0163611	0.132024	-0.123925	0.901375	0.999739	0.999739	1175.96	917.999	914.305	1030.04	988.904	812.389	1079.38	1115.81
Arhgef10	877.308	0.023791	0.116001	0.205092	0.8375	0.999739	0.999739	915.917	971.423	816.375	775.807	754.064	918.353	903.129	963.393
Arhgef10l	1168.25	0.0307762	0.0953628	0.322727	0.746902	0.999739	0.999739	1286.9	1107.65	1186.43	1040.53	1161.32	1100.69	1233.79	1228.67
Arhgef11	2002.5	0.0211024	0.132544	0.15921	0.873503	0.999739	0.999739	1977.39	1885.86	1719.41	2366.74	1663.7	1974.17	2253.45	2179.27
Arhgef12	1144.83	0.143111	0.370088	0.386694	0.698983	0.999739	0.999739	828.94	1181.56	636.113	1705.38	736.228	1262.97	1415.87	1391.57
Arhgef15	90.4886	0.0992651	0.189074	0.525005	0.599579	0.999739	0.999739	104.727	83.6973	82.3308	78.6291	90.1706	105.009	104.879	74.4651
Arhgef16	21.8333	0.292273	0.333523	0.876322	0.380855	0.999739	0.999739	26.6255	18.6983	18.1994	14.8522	26.7539	20.0472	26.2199	23.2704
Arhgef17	2998.24	0.00409671	0.126917	0.0322788	0.97425	0.999739	0.999739	3107.19	2774.48	2614.65	3477.16	2546.58	2844.79	3402.76	3218.29
Arhgef18	788.481	0.110384	0.112409	0.981986	0.326107	0.999739	0.999739	773.027	717.66	747.91	792.407	691.639	775.159	876.909	933.141
Arhgef19	204.502	0.0744901	0.165704	0.449537	0.653045	0.999739	0.999739	207.679	206.572	223.593	158.132	188.268	228.156	249.089	174.528
Arhgef2	2591.25	-0.0900259	0.0716779	-1.25598	0.209124	0.999739	0.999739	2777.93	2536.74	2543.59	2828.9	2416.77	2518.31	2554.98	2552.76
Arhgef25	4300.79	-0.144803	0.0957559	-1.51221	0.13048	0.999739	0.999739	4817.44	4211.58	4750.92	4284.41	4280.63	3542.63	4142.74	4375.99
Arhgef26	780.52	0.0340523	0.103572	0.328779	0.742323	0.999739	0.999739	713.563	752.385	728.844	890.257	750.101	784.705	769.116	855.185
Arhgef28	884.47	-0.0195228	0.0995322	-0.196146	0.844496	0.999739	0.999739	917.692	893.959	795.575	952.286	849.189	859.166	987.615	820.28
Arhgef3	1375.74	0.00796453	0.102651	0.0775886	0.938155	0.999739	0.999739	1194.6	1297.31	1417.82	1577.82	1383.28	1339.34	1357.61	1438.11
Arhgef33	66.6858	0.212168	0.330511	0.64194	0.520912	0.999739	0.999739	61.2386	70.3414	51.9984	63.777	59.4532	54.4139	40.7865	131.477
Arhgef37	107.764	-0.000218898	0.221396	-0.000988716	0.999211	0.999785	0.999785	91.4142	89.0397	104.863	145.027	83.2344	100.236	112.163	136.132
Arhgef38	2.90523	-3.23749	1.31214	-2.46734	0.0136123	0.999739	0.999739	0.887516	9.79437	5.19984	5.24194	0	0.954629	0	1.16352
Arhgef39	6.14097	0.0996901	0.656145	0.151933	0.87924	0.999739	0.999739	10.6502	2.67119	6.06648	4.36829	9.90886	3.81852	5.82664	5.81759
Arhgef4	5032.71	-0.0253953	0.0631853	-0.401919	0.687744	0.999739	0.999739	5218.6	4990.68	5328.1	4771.04	5055.5	4977.44	4961.38	4958.91
Arhgef40	521.46	0.0833255	0.169733	0.490921	0.623482	0.999739	0.999739	558.248	515.54	461.052	489.248	431.035	434.356	566.641	715.563
Arhgef5	24.4261	0.0618847	0.366115	0.169031	0.865772	0.999739	0.999739	23.0754	16.0271	22.5326	33.199	22.7904	21.0018	39.3298	17.4528
Arhgef6	173.753	0.038912	0.222792	0.174656	0.86135	0.999739	0.999739	141.115	175.408	129.129	239.382	130.797	199.517	202.476	172.201
Arhgef7	1905.6	0.0393751	0.113176	0.347909	0.727908	0.999739	0.999739	1889.52	1818.19	1684.75	2123.86	1631	1930.26	2096.13	2071.06
Arhgef9	7542.79	0.0609317	0.160138	0.380496	0.703578	0.999739	0.999739	6273.85	7332.42	5988.48	9938.72	6618.13	8165.9	8214.1	7810.69
Arid1a	1877.76	0.0391824	0.163527	0.239607	0.810635	0.999739	0.999739	1751.07	1733.6	1532.22	2391.2	1448.68	2030.5	2050.98	2083.86
Arid1b	1771.49	0.0543403	0.152332	0.356723	0.7213	0.999739	0.999739	1585.1	1686.41	1471.55	2207.73	1509.12	1660.1	2002.91	2048.95
Arid2	443.289	0.376294	0.257055	1.46386	0.143231	0.999739	0.999739	320.393	382.871	255.659	583.603	321.047	494.498	562.271	625.972
Arid3a	62.8103	0.321265	0.290648	1.10534	0.269012	0.999739	0.999739	46.1509	57.8758	37.2655	81.2501	50.5352	58.2324	87.3996	83.7733
Arid3b	118.052	0.0588323	0.175858	0.334545	0.737968	0.999739	0.999739	114.49	129.998	95.3304	122.312	125.843	97.3722	119.446	139.622
Arid3c	2.55283	-0.0916009	0.949605	-0.0964622	0.923154	0.999739	0.999739	5.3251	1.78079	0.86664	2.62097	2.97266	1.90926	1.45666	3.49055
Arid4a	760.837	0.149902	0.100528	1.49114	0.135925	0.999739	0.999739	686.05	787.111	649.98	760.955	726.32	811.435	843.406	821.443
Arid4b	767.415	0.181794	0.134678	1.34985	0.177066	0.999739	0.999739	629.249	894.849	718.444	635.149	906.661	829.573	763.29	762.104
Arid5a	246.324	0.072399	0.140367	0.515782	0.606007	0.999739	0.999739	213.891	292.05	236.593	219.288	255.649	267.296	222.869	262.955
Arid5b	304.005	0.392857	0.426787	0.9205	0.357312	0.999739	0.999739	203.241	270.681	137.796	439.449	189.259	390.443	431.171	369.999
Arih1	1633.55	0.198265	0.107454	1.84511	0.065021	0.999739	0.999739	1327.72	1653.47	1394.42	1708.87	1639.92	1689.69	1848.5	1805.78
Arih2	1297.69	0.00921444	0.0705554	0.130599	0.896093	0.999739	0.999739	1246.96	1260.8	1309.49	1358.54	1337.7	1324.07	1262.92	1281.03
Arl1	2337.48	-0.0845801	0.119786	-0.706094	0.48013	0.999739	0.999739	2395.41	2477.08	2738.58	2014.65	2552.52	2370.34	2126.72	2024.52
Arl10	595.748	0.0429008	0.109168	0.392978	0.694336	0.999739	0.999739	581.323	552.046	569.382	646.506	699.566	587.097	562.271	567.797
Arl11	46.7773	0.115832	0.229858	0.503928	0.614312	0.999739	0.999739	37.2757	44.5199	53.7317	44.5565	53.5079	51.55	43.6998	45.3772
Arl13b	247.155	-0.0332183	0.115734	-0.287023	0.774095	0.999739	0.999739	267.142	258.215	241.792	233.266	256.64	229.111	231.609	259.464
Arl14ep	896.034	0.0287975	0.114771	0.250913	0.801881	0.999739	0.999739	775.689	941.15	794.709	1037.03	866.035	947.947	895.846	909.871
Arl15	1385.09	0.0172906	0.119871	0.144244	0.885308	0.999739	0.999739	1411.15	1224.3	1240.16	1631.12	1280.22	1365.12	1359.06	1569.59
Arl16	854.765	-0.156331	0.111129	-1.40675	0.159502	0.999739	0.999739	957.63	892.178	977.569	778.428	913.597	777.068	739.983	801.664
Arl2	1189.96	0.0130918	0.136654	0.0958024	0.923678	0.999739	0.999739	1295.77	1065.81	1403.09	975.001	1332.74	1257.25	1099.78	1090.22
Arl2bp	5616.58	-0.0630232	0.0819309	-0.769224	0.44176	0.999739	0.999739	5510.59	5907.78	6277.07	5262.91	5702.55	5679.09	5399.84	5192.78
Arl3	3137	-0.230488	0.125469	-1.83701	0.0662081	0.999739	0.999739	3396.53	3255.29	4156.4	2740.66	3058.87	2903.98	2801.16	2783.13
Arl4a	502.013	0.0988768	0.132209	0.747881	0.454532	0.999739	0.999739	469.496	525.334	526.917	419.355	591.559	563.231	479.241	440.973
Arl4c	355.689	0.0442541	0.123333	0.358817	0.719732	0.999739	0.999739	288.443	349.036	376.122	387.03	356.719	345.576	353.968	388.615
Arl4d	291.251	0.270174	0.164484	1.64255	0.100475	0.999739	0.999739	267.142	269.79	306.79	213.172	404.282	285.434	302.985	280.408
Arl5a	919.361	0.234538	0.166235	1.41089	0.158278	0.999739	0.999739	700.25	907.315	690.712	1079.84	817.481	963.221	1077.93	1118.14
Arl5b	135.95	0.437897	0.297913	1.46988	0.141594	0.999739	0.999739	77.2139	121.984	71.0644	191.331	122.87	145.104	160.233	197.798
Arl6	743.709	-0.0598498	0.0972188	-0.61562	0.538145	0.999739	0.999739	735.751	822.727	801.642	676.211	752.083	728.382	754.55	678.331
Arl6ip1	5839.72	0.0170713	0.0693061	0.246317	0.805437	0.999739	0.999739	5581.59	5767.1	6069.08	5805.45	6225.74	6038.98	5704.28	5525.55
Arl6ip4	1192.95	-0.188004	0.133599	-1.40722	0.159362	0.999739	0.999739	1275.36	1192.24	1562.55	1052.76	1261.4	1076.82	1088.12	1034.37
Arl6ip5	3446.41	-0.116983	0.0862008	-1.3571	0.17475	0.999739	0.999739	3627.28	3495.7	3899.01	3324.27	3623.67	3322.11	3178.43	3100.77
Arl6ip6	174.464	0.142324	0.126791	1.12251	0.261646	0.999739	0.999739	157.09	184.312	159.462	162.5	186.287	180.425	186.452	179.182
Arl8a	5040.93	-0.0262605	0.0763691	-0.343862	0.73095	0.999739	0.999739	5115.64	5051.22	5497.1	4684.55	5165.49	5144.5	4949.73	4719.23
Arl8b	8543.37	0.0109072	0.0610543	0.178647	0.858215	0.999739	0.999739	8125.21	8551.37	8759.13	8610.76	8831.77	8828.41	8428.23	8212.11
Arl9	0.697753	-1.69332	2.22206	-0.762052	0.446029	0.999739	0.999739	0	2.67119	0	1.74731	0	0	0	1.16352
Armc1	1692.04	-0.0217367	0.072736	-0.298844	0.765059	0.999739	0.999739	1625.04	1750.52	1742.81	1702.76	1794.49	1685.87	1631.46	1603.33
Armc10	841.872	0.0482531	0.100905	0.478203	0.632506	0.999739	0.999739	828.053	763.07	908.238	813.375	966.114	844.847	814.273	797.01
Armc12	0.330209	-1.67363	3.18051	-0.526216	0.598738	0.999739	0.999739	1.77503	0	0.86664	0	0	0	0	0
Armc2	105.912	0.202171	0.172857	1.16958	0.242169	0.999739	0.999739	98.5143	89.9301	85.7973	118.817	106.025	103.1	125.273	119.842
Armc3	38.162	-0.63499	0.327319	-1.93997	0.0523831	0.999739	0.999739	46.1509	49.8622	65.8646	23.5887	30.7175	27.6842	33.5032	27.9244
Armc5	686.342	-0.0174352	0.130917	-0.133178	0.894053	0.999739	0.999739	787.227	614.374	772.176	588.845	735.238	632.919	623.45	736.507
Armc6	430.891	-0.0550073	0.151326	-0.363503	0.716229	0.999739	0.999739	495.234	402.459	504.384	355.578	482.562	397.126	358.338	451.445
Armc7	180.011	0.0142515	0.153189	0.0930318	0.925878	0.999739	0.999739	193.479	154.929	181.128	188.71	214.031	179.47	145.666	182.672
Armc8	1311.65	0.0320909	0.0888068	0.361356	0.717833	0.999739	0.999739	1162.65	1276.83	1331.16	1417.95	1324.81	1388.03	1338.67	1253.11
Armc9	1194.51	-0.102622	0.0790432	-1.2983	0.194185	0.999739	0.999739	1343.7	1182.45	1233.23	1189.05	1206.9	1128.37	1144.93	1127.45
Armcx1	702.149	0.115253	0.141382	0.815187	0.414965	0.999739	0.999739	626.587	704.304	796.442	570.498	844.235	773.25	687.543	614.337
Armcx2	1911.71	-0.02102	0.0933428	-0.225192	0.82183	0.999739	0.999739	1789.23	1890.31	1934.34	2090.66	1989.7	2060.09	1844.13	1695.25
Armcx3	4193.73	0.00150169	0.0854675	0.0175703	0.985982	0.999739	0.999739	3821.65	4429.73	4316.73	4199.67	4327.2	4493.44	4160.22	3801.21
Armcx4	1114.32	0.0405291	0.1306	0.310329	0.756311	0.999739	0.999739	983.368	1102.31	943.771	1364.65	1105.83	1166.56	1214.85	1033.2
Armcx5	588.898	0.0281575	0.130327	0.216053	0.828947	0.999739	0.999739	502.334	574.306	611.848	646.506	673.803	652.966	514.201	535.218
Armcx6	159.422	0.115517	0.153195	0.754056	0.450816	0.999739	0.999739	144.665	146.025	157.728	163.374	196.195	145.104	179.169	143.113
Armh1	21.7094	-0.376362	0.336983	-1.11686	0.264054	0.999739	0.999739	26.6255	26.7119	22.5326	22.7151	25.763	15.2741	13.1099	20.9433
Armh2	0.328477	-1.66751	2.65645	-0.62772	0.530187	0.999739	0.999739	0.887516	0	0.86664	0.873657	0	0	0	0
Armh3	428.77	0.0596465	0.0977953	0.609912	0.54192	0.999739	0.999739	408.258	408.692	398.654	463.038	428.063	438.175	461.761	423.52
Armh4	485.321	0.00145843	0.0994749	0.0146613	0.988302	0.999739	0.999739	473.046	460.335	474.052	531.183	445.899	475.405	508.374	514.275
Armt1	621.414	-0.0841095	0.100659	-0.835593	0.403384	0.999739	0.999739	688.713	602.799	617.914	648.254	643.085	597.598	642.387	530.564
Arnt	539.015	0.0245593	0.134984	0.181942	0.855628	0.999739	0.999739	520.972	532.457	446.319	637.77	476.616	557.503	527.311	613.174
Arnt2	1521.99	0.131055	0.127475	1.02808	0.303912	0.999739	0.999739	1378.31	1480.73	1200.3	1751.68	1459.58	1699.24	1708.66	1497.45
Arntl	712.694	0.065175	0.118777	0.548717	0.5832	0.999739	0.999739	765.039	698.071	671.646	654.369	740.192	864.894	645.3	662.042
Arntl2	15.9352	-0.1386	0.639154	-0.216848	0.828326	0.999739	0.999739	15.0878	23.1503	6.06648	21.8414	5.94532	14.3194	36.4165	4.65407
Arpc1a	4819.79	-0.0931129	0.0785029	-1.18611	0.23558	0.999739	0.999739	5268.3	4682.6	5299.5	4652.22	4882.1	4742.6	4560.8	4470.23
Arpc1b	279.815	-0.137895	0.159503	-0.864528	0.387298	0.999739	0.999739	277.793	302.735	359.655	232.393	306.184	231.975	269.482	258.301
Arpc2	7417.52	-0.187335	0.0790063	-2.37114	0.0177331	0.999739	0.999739	8237.93	7527.42	8297.21	7534.42	7526.77	7012.7	6458.83	6744.91
Arpc3	3584.37	-0.191625	0.119717	-1.60065	0.109455	0.999739	0.999739	4091.45	3663.09	4165.94	3370.57	3871.39	3568.4	2981.78	2962.32
Arpc4	3855.84	-0.0815481	0.0855544	-0.953172	0.340503	0.999739	0.999739	4409.18	3622.14	4048.94	3779.44	3959.58	3607.54	3678.07	3741.87
Arpc5	4427.15	-0.0956885	0.0659653	-1.45059	0.146894	0.999739	0.999739	4642.6	4401.23	4624.39	4631.26	4494.66	4415.16	4037.86	4170.05
Arpc5l	920.906	-0.0253444	0.126891	-0.199735	0.841688	0.999739	0.999739	920.354	907.315	1071.17	818.617	1096.91	853.438	830.296	869.148
Arpin	153.078	-0.0945786	0.144435	-0.654816	0.512586	0.999739	0.999739	174.841	149.587	153.395	154.637	131.788	168.969	152.949	138.459
Arpp21	4300.93	0.0285058	0.13826	0.206174	0.836655	0.999739	0.999739	3673.43	4284.59	4769.12	4308.88	5051.54	4911.57	3892.19	3516.15
Arr3	2.25779	1.24131	1.04702	1.18556	0.235795	0.999739	0.999739	1.77503	2.67119	0	0.873657	2.97266	1.90926	4.36998	3.49055
Arrb1	654.572	0.261246	0.282323	0.925345	0.354787	0.999739	0.999739	494.347	601.908	350.989	933.939	415.181	757.021	853.603	829.588
Arrb2	1072.68	-0.171006	0.0810768	-2.10919	0.0349281	0.999739	0.999739	1178.62	1094.3	1161.3	1109.54	1078.08	935.536	1038.6	985.499
Arrdc1	220.411	-0.0735731	0.145583	-0.505368	0.613301	0.999739	0.999739	257.38	189.655	225.326	231.519	237.813	182.334	211.216	228.049
Arrdc2	532.644	-0.00644875	0.177434	-0.0363445	0.971008	0.999739	0.999739	602.624	589.443	513.917	429.839	557.869	438.175	431.171	698.111
Arrdc3	896.41	0.222922	0.120304	1.85299	0.063884	0.999739	0.999739	687.825	995.464	793.842	832.595	946.296	996.633	924.979	993.644
Arrdc4	169.74	-0.000790622	0.14915	-0.00530085	0.995771	0.999739	0.999739	145.553	164.723	168.995	199.194	159.533	157.514	170.429	191.98
Arsa	1020.03	0.0906726	0.101549	0.892896	0.371913	0.999739	0.999739	1088.98	988.341	948.97	922.582	998.813	967.994	1197.37	1047.17
Arsb	2880.84	0.0398013	0.0905005	0.439791	0.660089	0.999739	0.999739	2708.7	2764.68	2742.91	3146.91	2596.12	3034.77	2994.89	3057.72
Arse	236.064	0.172615	0.184829	0.933915	0.350348	0.999739	0.999739	264.48	211.024	207.994	203.562	237.813	186.153	244.719	332.766
Arsg	216.344	-0.224334	0.140967	-1.5914	0.111519	0.999739	0.999739	210.341	237.736	209.727	276.076	212.05	205.245	174.799	204.779
Arsi	34.8957	0.104857	0.28195	0.371898	0.709969	0.999739	0.999739	46.1509	32.0543	29.4657	27.0834	30.7175	42.9583	33.5032	37.2326
Arsj	6.22649	0.686849	0.698843	0.982837	0.325687	0.999739	0.999739	1.77503	3.56159	3.46656	10.4839	7.92709	12.4102	4.36998	5.81759
Arsk	334.821	0.0781124	0.137712	0.567217	0.570567	0.999739	0.999739	266.255	376.638	311.124	348.589	313.12	372.305	367.078	323.458
Art1	0.695201	1.03975	2.05309	0.506429	0.612555	0.999739	0.999739	0.887516	0.890397	0	0	0	0	1.45666	2.32704
Art2b	0.347864	1.00519	3.17632	0.316464	0.751651	0.999739	0.999739	0	0	0	0.873657	0	1.90926	0	0
Art3	76.818	0.0642262	0.236592	0.271464	0.786034	0.999739	0.999739	82.539	76.5741	89.2639	53.2931	99.0886	86.8712	58.2664	68.6475
Art4	8.17786	-0.429024	0.589266	-0.728065	0.466574	0.999739	0.999739	5.3251	16.9175	8.6664	6.98926	9.90886	8.59166	4.36998	4.65407
Art5	1.77913	-0.692347	1.20939	-0.572478	0.566998	0.999739	0.999739	4.43758	2.67119	0.86664	0.873657	2.97266	0.954629	1.45666	0
Artn	8.50849	0.132675	0.580885	0.228402	0.819334	0.999739	0.999739	2.66255	7.12318	7.79976	14.8522	10.8997	6.6824	8.73996	9.30814
Arv1	344.469	-0.0555944	0.110741	-0.502023	0.615652	0.999739	0.999739	367.432	321.433	363.122	352.957	380.5	315.028	330.662	324.621
Arvcf	777.562	0.128956	0.114418	1.12707	0.259715	0.999739	0.999739	849.353	694.51	701.111	724.262	809.554	695.925	887.106	858.676
Arx	376.442	0.0193056	0.106485	0.181299	0.856133	0.999739	0.999739	410.033	381.09	356.189	348.589	360.683	378.033	362.708	414.212
As3mt	171.674	-0.196747	0.155953	-1.26158	0.207099	0.999739	0.999739	200.579	192.326	196.727	144.153	145.66	180.425	158.776	154.748
Asah1	1214.2	0.00672317	0.0888322	0.075684	0.939671	0.999739	0.999739	1090.76	1281.28	1189.03	1286.02	1250.5	1283.98	1181.35	1150.72
Asah2	268.349	0.149291	0.176826	0.844278	0.398514	0.999739	0.999739	225.429	303.625	255.659	234.14	226.913	373.26	257.829	269.936
Asap1	1581.01	0.216939	0.126762	1.71139	0.0870087	0.999739	0.999739	1348.14	1476.28	1532.22	1493.95	1543.8	2118.32	1680.99	1454.4
Asap2	1380.63	0.247224	0.121784	2.03003	0.0423538	0.999739	0.999739	1229.21	1216.28	1122.3	1480.85	1325.81	1542.68	1724.68	1403.2
Asap3	60.7406	0.0792411	0.263481	0.300747	0.763607	0.999739	0.999739	73.6639	67.6702	54.5983	40.1882	51.5261	55.3685	56.8097	86.1003
Asb1	401.462	0.249543	0.253495	0.984408	0.324915	0.999739	0.999739	268.917	355.268	272.991	569.624	285.375	494.498	487.981	477.042
Asb11	6.78252	0.673448	0.587276	1.14673	0.251492	0.999739	0.999739	5.3251	7.12318	5.19984	3.49463	12.8815	8.59166	5.82664	5.81759
Asb12	0.34574	-0.376087	3.19133	-0.117846	0.906189	0.999739	0.999739	1.77503	0	0	0	0.990886	0	0	0
Asb13	671.02	0.0284742	0.109965	0.25894	0.795682	0.999739	0.999739	632.799	731.906	664.713	626.412	605.431	715.017	764.746	627.136
Asb14	15.8363	0.212632	0.373345	0.569532	0.568995	0.999739	0.999739	15.0878	15.1367	16.4662	12.2312	20.8086	18.138	16.0233	12.7987
Asb15	246.829	-0.0900367	1.71878	-0.0523841	0.958223	0.999739	0.999739	243.179	558.279	212.327	4.36829	0.990886	294.026	2.91332	658.551
Asb16	2.26487	0.66181	0.985583	0.671491	0.501908	0.999739	0.999739	0.887516	0.890397	1.73328	3.49463	3.96354	1.90926	2.91332	2.32704
Asb18	1.11971	0.656386	1.61331	0.406856	0.684114	0.999739	0.999739	0	0	2.59992	0.873657	0	2.86389	1.45666	1.16352
Asb2	131.016	0.113229	0.159935	0.707969	0.478965	0.999739	0.999739	147.328	105.067	136.062	114.449	134.761	129.83	145.666	134.968
Asb3	450.314	0.0271036	0.102729	0.263837	0.791906	0.999739	0.999739	405.595	443.418	484.452	451.681	487.516	462.04	450.108	417.703
Asb4	1.00018	-0.358288	1.55253	-0.230778	0.817487	0.999739	0.999739	2.66255	0.890397	0	0.873657	0	0.954629	1.45666	1.16352
Asb5	20.509	0.0572404	0.352278	0.162487	0.870923	0.999739	0.999739	25.738	17.8079	22.5326	14.8522	26.7539	22.9111	16.0233	17.4528
Asb6	705.247	0.0169136	0.099442	0.170085	0.864943	0.999739	0.999739	738.414	624.168	747.91	695.431	766.946	690.197	654.04	724.871
Asb7	265.185	0.18518	0.129866	1.42593	0.153888	0.999739	0.999739	230.754	256.434	218.393	285.686	267.539	264.432	313.182	285.062
Asb8	1693.84	-0.0206423	0.0770125	-0.268038	0.78867	0.999739	0.999739	1720.89	1624.08	1805.21	1674.8	1818.28	1640.05	1648.94	1618.45
Asb9	1.49974	0.019338	1.30543	0.0148135	0.988181	0.999739	0.999739	0.887516	0.890397	2.59992	1.74731	3.96354	1.90926	0	0
Ascc1	418.414	-0.0890329	0.115881	-0.76831	0.442303	0.999739	0.999739	449.971	439.856	464.519	372.178	455.808	389.489	378.731	396.76
Ascc2	208.782	-0.0468429	0.137496	-0.340685	0.733341	0.999739	0.999739	206.791	196.778	196.727	248.992	188.268	227.202	193.736	211.76
Ascc3	423.263	0.101751	0.106879	0.952025	0.341084	0.999739	0.999739	414.47	443.418	366.589	407.998	393.382	453.449	458.848	447.954
Ascl1	208.103	0.173656	0.150317	1.15527	0.247982	0.999739	0.999739	205.016	221.709	202.794	153.764	222.949	247.249	211.216	200.125
Ascl2	20.0676	-0.167001	0.373899	-0.446647	0.65513	0.999739	0.999739	27.513	11.5752	25.9992	20.0941	22.7904	19.0926	16.0233	17.4528
Ascl3	4.26457	-0.246704	0.731577	-0.337221	0.73595	0.999739	0.999739	4.43758	7.12318	3.46656	3.49463	4.95443	1.90926	2.91332	5.81759
Ascl4	1.74751	0.342704	1.34669	0.254479	0.799126	0.999739	0.999739	3.55007	0.890397	0.86664	0.873657	1.98177	0	0	5.81759
Ascl5	0.693964	0.228448	1.80598	0.126496	0.89934	0.999739	0.999739	0.887516	0.890397	0	0.873657	0.990886	1.90926	0	0
Asf1a	365.897	0.0860363	0.115913	0.742251	0.457935	0.999739	0.999739	309.743	385.542	346.656	377.42	339.874	399.99	393.298	374.653
Asf1b	3.36479	1.0252	0.819298	1.25131	0.210821	0.999739	0.999739	3.55007	2.67119	1.73328	0.873657	4.95443	3.81852	5.82664	3.49055
Asgr1	6.81447	0.179008	0.57346	0.312154	0.754924	0.999739	0.999739	7.98765	8.01357	5.19984	4.36829	9.90886	4.77315	7.2833	6.98111
Asgr2	14.5249	-0.221134	0.408474	-0.541367	0.588255	0.999739	0.999739	16.8628	14.2464	19.0661	12.2312	17.836	8.59166	14.5666	12.7987
Ash1l	2824.16	0.204477	0.164143	1.24572	0.212866	0.999739	0.999739	2254.29	2875.98	2097.27	3269.22	2352.36	3321.15	3227.96	3195.02
Ash2l	867.237	-0.0236674	0.0843107	-0.280717	0.778928	0.999739	0.999739	898.167	842.316	832.841	921.708	862.071	800.934	917.696	862.167
Asic1	993.607	0.0676792	0.0875336	0.77318	0.439416	0.999739	0.999739	1011.77	964.3	993.169	914.719	1104.84	1053.91	949.742	956.411
Asic2	996.221	-0.0427702	0.0901666	-0.474347	0.635253	0.999739	0.999739	1061.47	979.437	913.438	1090.32	939.36	1037.68	961.395	986.663
Asic3	11.3279	-0.395665	0.466139	-0.848814	0.395985	0.999739	0.999739	15.9753	8.01357	16.4662	11.3575	12.8815	10.5009	7.2833	8.14462
Asic4	249.65	0.261812	0.241354	1.08476	0.278026	0.999739	0.999739	205.016	205.682	246.126	249.866	307.175	189.017	409.321	184.999
Asl	267.565	-0.140754	0.108619	-1.29585	0.195027	0.999739	0.999739	277.793	283.146	288.591	273.455	279.43	244.385	250.545	243.175
Asmt	4.09662	-0.193324	0.81765	-0.236439	0.813092	0.999739	0.999739	1.77503	5.34238	2.59992	7.86291	1.98177	4.77315	1.45666	6.98111
Asmtl	606.019	0.0316997	0.159139	0.199195	0.842111	0.999739	0.999739	705.576	583.21	677.712	430.713	653.985	536.502	608.884	651.57
Asns	1513.26	-0.0738016	0.0975937	-0.756213	0.449522	0.999739	0.999739	1523.87	1451.35	1459.42	1770.9	1468.49	1375.62	1606.7	1449.74
Asnsd1	874.539	-0.0664501	0.0844601	-0.786764	0.43142	0.999739	0.999739	871.541	953.615	911.705	843.953	867.025	910.716	818.643	819.116
Aspa	478.568	-0.0840616	0.172465	-0.487411	0.625967	0.999739	0.999739	518.31	586.772	538.183	327.621	484.543	502.135	431.171	439.81
Aspdh	83.1529	-0.189514	0.21993	-0.861704	0.388851	0.999739	0.999739	74.5514	73.903	81.4641	124.933	78.28	83.0527	69.9197	79.1192
Aspg	22.2108	-0.0803939	0.391688	-0.20525	0.837377	0.999739	0.999739	34.6131	13.356	22.5326	20.0941	18.8268	15.2741	32.0465	20.9433
Asph	1496.2	0.120757	0.0717294	1.68351	0.0922759	0.999739	0.999739	1367.66	1472.72	1442.95	1452.02	1630.01	1576.09	1564.45	1463.71
Asphd1	410.786	0.0841551	0.167867	0.501319	0.616146	0.999739	0.999739	451.746	331.228	487.918	325	509.315	397.126	397.668	386.288
Asphd2	1737.3	-0.0983081	0.0993783	-0.989231	0.32255	0.999739	0.999739	1964.07	1669.49	1945.61	1605.78	1769.72	1553.18	1740.71	1649.87
Aspm	20.3742	0.0470243	0.391167	0.120215	0.904312	0.999739	0.999739	28.4005	24.9311	15.5995	11.3575	17.836	26.7296	21.8499	16.2892
Aspn	9.04376	-0.685611	0.61574	-1.11347	0.265505	0.999739	0.999739	6.21261	4.45199	19.9327	13.9785	3.96354	9.54629	7.2833	6.98111
Aspscr1	904.728	-0.0981574	0.129165	-0.75994	0.447291	0.999739	0.999739	1028.63	882.383	1058.17	774.06	1003.77	865.849	824.469	800.5
Asrgl1	3918.45	-0.0814688	0.0908797	-0.896447	0.370014	0.999739	0.999739	3946.79	4159.04	4282.93	3728.77	4316.3	3587.5	3686.81	3639.48
Ass1	261.329	-0.148132	0.153483	-0.965138	0.334476	0.999739	0.999739	284.893	283.146	284.258	248.119	224.931	320.755	231.609	212.924
Aste1	86.3181	0.039463	0.180341	0.218824	0.826787	0.999739	0.999739	86.9766	87.2589	70.1978	95.2286	79.2709	82.0981	97.5962	91.9179
Astl	0.232191	0.355471	3.53381	0.100591	0.919875	0.999739	0.999739	0	0	0.86664	0	0.990886	0	0	0
Astn1	6027.37	-0.0163342	0.140889	-0.115936	0.907703	0.999739	0.999739	5692.53	5541.83	5163.44	7847.19	5221.97	6255.68	6464.66	6031.68
Astn2	650.5	-0.00580904	0.100278	-0.0579295	0.953805	0.999739	0.999739	663.862	641.086	664.713	638.643	578.678	711.199	603.057	702.765
Asxl1	872.504	0.0272812	0.129862	0.210078	0.833607	0.999739	0.999739	861.778	804.919	756.576	1032.66	743.165	946.037	954.112	880.783
Asxl2	146.616	0.383824	0.275093	1.39525	0.162941	0.999739	0.999739	102.952	129.998	84.064	191.331	103.052	177.561	190.822	193.144
Asxl3	44.9106	0.377216	0.359204	1.05014	0.293652	0.999739	0.999739	26.6255	55.2046	23.3993	50.6721	27.7448	59.187	64.093	52.3583
Atad1	2412.69	0.0512279	0.0897614	0.570712	0.568195	0.999739	0.999739	2184.18	2551.88	2371.13	2373.73	2518.83	2659.6	2444.27	2197.88
Atad2	95.553	0.16358	0.202684	0.807067	0.419628	0.999739	0.999739	72.7763	110.409	90.1305	87.3657	123.861	80.1888	96.1395	103.553
Atad2b	99.6878	0.422506	0.301184	1.40281	0.160672	0.999739	0.999739	60.3511	103.286	52.865	124.059	74.3165	121.238	113.619	147.767
Atad3a	681.014	0.0209165	0.0879913	0.237711	0.812105	0.999739	0.999739	676.287	650.88	738.377	639.517	722.356	674.923	668.607	677.167
Atad5	76.6531	-0.0447421	0.192196	-0.232793	0.815922	0.999739	0.999739	74.5514	69.451	80.5975	87.3657	65.3985	89.7351	67.0063	79.1192
Atat1	2153.96	-0.0375574	0.0660589	-0.568544	0.569666	0.999739	0.999739	2211.69	2124.49	2241.13	2153.56	2232.47	2140.28	2017.47	2110.62
Atcay	6458.91	0.0309004	0.0830034	0.372278	0.709686	0.999739	0.999739	6533.01	6119.7	6667.93	6241.41	6871.8	7092.89	6196.63	5947.9
Ate1	1385.47	0.0951343	0.129425	0.735052	0.462308	0.999739	0.999739	1142.23	1399.7	1200.3	1616.27	1263.38	1531.22	1519.3	1411.35
Atf1	403.599	-0.0399252	0.123779	-0.322553	0.747034	0.999739	0.999739	373.644	443.418	353.589	467.407	411.218	420.037	368.535	390.942
Atf2	2863.05	0.114225	0.0977181	1.16892	0.242435	0.999739	0.999739	2440.67	2874.2	2573.05	3111.97	2967.7	3165.55	2943.91	2827.35
Atf3	17.1626	-0.0971483	0.472807	-0.205471	0.837204	0.999739	0.999739	11.5377	11.5752	21.666	26.2097	6.9362	23.8657	14.5666	20.9433
Atf4	3942.18	0.0154451	0.104506	0.147791	0.882508	0.999739	0.999739	3818.98	3848.3	4399.93	3619.56	4529.34	4045.72	3625.63	3649.95
Atf5	1508.57	-0.102496	0.152123	-0.67377	0.500457	0.999739	0.999739	1811.42	1509.22	1820.81	1106.92	1496.24	1372.76	1459.57	1491.63
Atf6	897.937	0.0876316	0.183625	0.477232	0.633197	0.999739	0.999739	730.426	868.137	686.379	1196.91	731.274	986.132	1031.32	952.921
Atf6b	1991.97	0.0795106	0.0920561	0.863719	0.387742	0.999739	0.999739	2184.18	1844.01	1971.61	1748.19	2004.56	1984.67	2026.21	2172.29
Atf7	115.381	0.242952	0.284578	0.853727	0.393256	0.999739	0.999739	78.989	113.08	67.5979	162.5	84.2253	130.784	148.579	137.295
Atf7ip	1308.58	0.102487	0.141887	0.722315	0.470101	0.999739	0.999739	1167.08	1222.52	1090.23	1567.34	1128.62	1446.26	1529.49	1317.1
Atf7ip2	1.82988	0.110053	1.21505	0.0905754	0.92783	0.999739	0.999739	1.77503	4.45199	0	0.873657	3.96354	0.954629	1.45666	1.16352
Atg10	134.084	-0.119766	0.180865	-0.662184	0.507853	0.999739	0.999739	163.303	146.916	143.862	104.839	123.861	147.967	132.556	109.371
Atg101	863.048	-0.0359523	0.1208	-0.297619	0.765994	0.999739	0.999739	914.142	813.823	997.502	771.439	985.932	845.801	782.226	793.519
Atg12	1814.44	0.07251	0.0688796	1.05271	0.292476	0.999739	0.999739	1751.07	1771	1813.01	1742.07	1995.64	1813.8	1797.52	1831.38
Atg13	2858.7	0.0259898	0.0590415	0.440195	0.659796	0.999739	0.999739	2832.06	2786.94	2810.51	2899.67	2797.27	2830.48	2970.13	2942.54
Atg14	453.136	-0.0140257	0.0912968	-0.153627	0.877904	0.999739	0.999739	429.558	443.418	482.718	466.533	458.78	455.358	432.628	456.099
Atg16l1	1117.86	-0.016834	0.0770381	-0.218515	0.827028	0.999739	0.999739	1080.99	1059.57	1161.3	1196.04	1104.84	1141.74	1107.06	1091.38
Atg16l2	92.0252	0.167739	0.172299	0.973537	0.330287	0.999739	0.999739	90.5267	80.1357	81.4641	93.4813	90.1706	95.4629	116.533	88.4273
Atg2a	1060.76	0.0812479	0.114545	0.709313	0.478131	0.999739	0.999739	1080.99	924.232	960.237	1155.85	949.269	1054.87	1201.74	1158.86
Atg2b	980.651	0.157248	0.205257	0.766103	0.443615	0.999739	0.999739	826.278	875.26	668.179	1338.44	790.727	1026.23	1150.76	1169.34
Atg3	1208.24	-0.0316388	0.111686	-0.283284	0.776959	0.999739	0.999739	1161.76	1305.32	1325.96	1093.82	1389.22	1119.78	1168.24	1101.85
Atg4b	1308.57	0.0147295	0.0662873	0.222207	0.824153	0.999739	0.999739	1341.92	1255.46	1299.96	1311.36	1309.95	1342.21	1284.77	1322.92
Atg4c	975.486	-0.127771	0.107776	-1.18552	0.23581	0.999739	0.999739	931.892	1096.97	927.304	1116.53	832.344	912.625	994.899	991.317
Atg4d	671.443	0.0209223	0.107702	0.19426	0.845972	0.999739	0.999739	655.875	730.126	681.179	601.076	769.919	661.558	619.08	652.733
Atg5	607.033	-0.0353123	0.0945374	-0.373528	0.708756	0.999739	0.999739	610.611	630.401	645.647	571.372	655.967	553.685	592.86	595.721
Atg7	410.996	0.069763	0.103471	0.674225	0.500168	0.999739	0.999739	402.932	363.282	411.654	425.471	381.491	439.129	436.998	427.011
Atg9a	3378.45	0.0572597	0.0589913	0.970647	0.331724	0.999739	0.999739	3372.56	3229.47	3287.16	3356.59	3311.54	3558.86	3434.8	3476.59
Atg9b	4.40856	-0.717349	0.818852	-0.876043	0.381007	0.999739	0.999739	5.3251	3.56159	7.79976	5.24194	6.9362	0	2.91332	3.49055
Atic	945.999	-0.0339622	0.0909853	-0.373272	0.708946	0.999739	0.999739	977.156	860.124	994.036	998.59	897.743	988.996	873.996	977.355
Atl1	3977.76	-0.00238202	0.0986158	-0.0241546	0.980729	0.999739	0.999739	3558.05	3982.75	3984.81	4400.61	4237.03	4277.69	3809.16	3572
Atl2	744.021	0.162559	0.138693	1.17208	0.241166	0.999739	0.999739	565.348	764.851	634.38	843.953	714.429	813.344	767.66	848.204
Atl3	213.636	0.236667	0.19804	1.19504	0.232071	0.999739	0.999739	165.078	201.23	152.529	264.718	184.305	226.247	269.482	245.502
Atm	162.052	0.480605	0.22803	2.10764	0.0350621	0.999739	0.999739	123.365	172.737	95.3304	149.395	131.788	228.156	219.956	175.691
Atmin	520.349	0.139296	0.122126	1.14059	0.254042	0.999739	0.999739	411.808	502.184	484.452	581.856	514.27	562.276	575.381	530.564
Atn1	4847.78	0.091623	0.0838731	1.0924	0.274657	0.999739	0.999739	5177.77	4426.16	4675.52	4496.71	4697.79	5164.54	4805.52	5338.22
Atoh7	5.53478	-0.184696	0.6729	-0.274477	0.783718	0.999739	0.999739	6.21261	4.45199	6.93312	6.1156	6.9362	2.86389	1.45666	9.30814
Atoh8	45.1372	0.359437	0.300476	1.19623	0.231608	0.999739	0.999739	25.738	46.3006	55.4649	30.578	43.599	46.7768	45.1564	67.484
Atox1	580.214	0.0349973	0.157762	0.221837	0.824441	0.999739	0.999739	585.761	535.129	739.244	432.46	638.131	551.776	597.23	561.979
Atp10a	182.861	0.0247438	0.166879	0.148274	0.882127	0.999739	0.999739	174.841	177.189	170.728	202.688	139.715	216.701	170.429	210.597
Atp10b	22.5621	0.262489	0.355998	0.737334	0.460919	0.999739	0.999739	21.3004	24.9311	14.7329	20.9678	13.8724	30.5481	26.2199	27.9244
Atp10d	86.1296	0.00645346	0.197566	0.0326648	0.973942	0.999739	0.999739	86.0891	90.8205	64.998	101.344	75.3073	92.599	97.5962	80.2827
Atp11a	941.918	0.280877	0.196658	1.42825	0.153219	0.999739	0.999739	748.176	919.78	657.779	1075.47	690.648	1124.55	1150.76	1168.17
Atp11b	834.094	0.176918	0.130149	1.35935	0.174037	0.999739	0.999739	639.899	851.22	742.71	898.119	774.873	975.631	894.389	895.909
Atp11c	142.375	0.382999	0.199681	1.91806	0.0551036	0.999739	0.999739	102.952	158.491	103.997	127.554	145.66	128.875	198.106	173.364
Atp12a	1.54521	-0.375666	1.20435	-0.311925	0.755097	0.999739	0.999739	2.66255	1.78079	1.73328	0.873657	0.990886	2.86389	1.45666	0
Atp13a1	866.717	-0.0742977	0.0887796	-0.836878	0.402661	0.999739	0.999739	948.755	839.644	850.173	916.466	798.654	817.162	844.863	918.015
Atp13a2	4732.15	0.0815746	0.0765364	1.06583	0.286501	0.999739	0.999739	4939.03	4242.74	4649.52	4562.24	4665.09	4862.88	4748.71	5186.96
Atp13a3	948.048	0.249635	0.152255	1.63959	0.101091	0.999739	0.999739	742.851	918.89	730.577	1071.1	858.107	988.996	1158.04	1115.81
Atp13a4	227.126	-0.0313518	0.137367	-0.228233	0.819465	0.999739	0.999739	213.891	194.107	256.525	253.361	211.059	237.703	237.436	212.924
Atp13a5	110.128	0.202536	0.257917	0.785273	0.432293	0.999739	0.999739	99.4018	68.5606	98.7969	142.406	75.3073	137.467	131.099	127.987
Atp1a1	11391.3	0.00102753	0.100936	0.01018	0.991878	0.999739	0.999739	10988.3	10793.4	10980.3	12787.7	12774.5	10270.9	10620.5	11914.4
Atp1a2	26783.1	-0.0764888	0.086051	-0.888877	0.374069	0.999739	0.999739	28334	27468.7	25806.8	28358	23734.7	25650.9	29401.2	25510.1
Atp1a3	37422.1	-0.0451014	0.104517	-0.431524	0.666088	0.999739	0.999739	40805.3	32703.4	37391.2	41129.2	34961.4	41599.9	36525.7	34260.9
Atp1a4	3.60881	-0.137861	0.776672	-0.177502	0.859114	0.999739	0.999739	5.3251	2.67119	2.59992	4.36829	2.97266	1.90926	4.36998	4.65407
Atp1b1	44442.1	-0.0271619	0.0797579	-0.340554	0.733439	0.999739	0.999739	42493.4	43183.4	47127	46641.1	46470.6	46889.5	41807.6	40924.4
Atp1b2	9632.92	0.0443458	0.0743636	0.596338	0.55095	0.999739	0.999739	9633.99	9540.6	9299.04	9464.33	8744.57	10067.5	9959.18	10354.1
Atp1b3	2179.77	-0.00863508	0.085527	-0.100963	0.91958	0.999739	0.999739	2299.55	2106.68	2330.39	2010.28	2354.35	2174.64	2094.68	2067.57
Atp23	113.62	-0.242135	0.183148	-1.32207	0.186144	0.999739	0.999739	138.453	107.738	121.33	125.807	132.779	87.8259	90.3129	104.717
Atp2a2	15839.3	0.135658	0.131356	1.03275	0.30172	0.999739	0.999739	13674	14149.3	13627	18930.4	14437.2	18622.9	16758.9	16515
Atp2a3	180.545	0.754799	0.285411	2.64461	0.00817862	0.999739	0.999739	144.665	124.656	140.396	127.554	165.478	161.332	171.886	408.395
Atp2b1	9051.13	0.0566737	0.133151	0.425635	0.670374	0.999739	0.999739	7726.72	8425.83	7925.42	11415.2	8360.11	9711.44	9372.15	9472.2
Atp2b2	7352.51	0.0212833	0.126444	0.168322	0.86633	0.999739	0.999739	6903.99	7065.3	6255.4	8967.22	6441.75	7727.72	8008.71	7450
Atp2b3	4405.07	0.303758	0.728754	0.416817	0.676812	0.999739	0.999739	4741.11	350.816	4133.87	6546.31	4086.41	4817.06	5227.95	5337.06
Atp2b4	2616.64	0.397617	0.174709	2.27588	0.0228533	0.999739	0.999739	1829.17	2518.93	1949.07	2736.29	3100.48	3423.3	3239.61	2136.22
Atp2c1	4586.43	0.0627688	0.0879082	0.714026	0.475211	0.999739	0.999739	4063.05	4775.2	4271.67	4838.31	4653.2	5056.67	4560.8	4472.56
[truncated: 18,024 more rows]
